# Supplementary material for: Rh(iii)-catalyzed double C–H activation of aldehyde hydrazones: a route for functionalized 1H-indazole synthesis
Source: PubMed Central journal article supplement (PMC5460599; doi:10.1039/c6sc03888c), 2016-10-07

# **Rh(III)-catalyzed double C-H activation of aldehyde hydrazones: en route to functionalized 1*H*-Indazole synthesis**

Pan Xu, Guoqiang Wang, Zhongkai Wu, Shuhua li\*, Chengjian Zhu\*

## **Table of Contents**

|                                                               |           |
|---------------------------------------------------------------|-----------|
| <b>1 General Information.....</b>                             | <b>2</b>  |
| <b>2 General Procedure for the Aldehyde Hydrazones.....</b>   | <b>2</b>  |
| <b>3 General Procedure for the 1<i>H</i>-indazoles .....</b>  | <b>12</b> |
| <b>4 X-ray Structure Characterization .....</b>               | <b>24</b> |
| <b>5 Optimization of the Reaction Conditions .....</b>        | <b>26</b> |
| <b>6 Deuterium Labeling Experiment.....</b>                   | <b>27</b> |
| <b>7 Computational Details of Mechanistic Studies .....</b>   | <b>30</b> |
| <b>8 Copies of <sup>1</sup>H NMR, <sup>13</sup>C NMR.....</b> | <b>62</b> |

## 1. General Information

All reactions were carried out under an atmosphere of argon atmosphere in flame-dried glassware unless otherwise noted. Reactions were monitored by TLC on silica gel plates (GF254), and the analytical thin-layer chromatography (TLC) was performed on precoated, glass-backed silica gel plates.  $^1\text{H}$  NMR,  $^{13}\text{C}$  NMR spectra were recorded on a Bruker AVANCE III-400 spectrometer at room temperature. Chemical shifts ( $\delta$ ) are reported in ppm downfield from tetramethylsilane. Abbreviations for signal couplings are: s, singlet; d, doublet; t, triplet; m, multiplet. The high and low resolution mass spectra were recorded in a positive and negative ion mode on a hybrid quadrupole time-of-flight mass spectrometer with an Electrospray Ionization (ESI) ion source. Hydrazine was obtained from commercial sources or prepared following the previous literature.<sup>1</sup> Solvents and all other reagents were obtained from commercial sources and used as received.

## 2. General Procedure for the Aldehyde Hydrazones

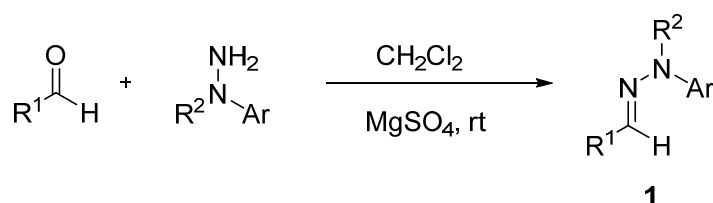

General procedure **A**: A mixture of hydrazine (2.4 mmol), aldehyde (2.0 mmol) and anhydrous  $\text{MgSO}_4$  (0.5 g) in  $\text{CH}_2\text{Cl}_2$  (10 mL) was stirred overnight at room temperature. After filtration of  $\text{MgSO}_4$ ,  $\text{CH}_2\text{Cl}_2$  was removed under reduced pressure and the residue was subjected to column chromatography to give the desired product **1**.

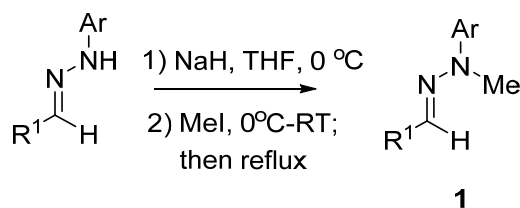

General procedure **B**<sup>2</sup>: To a solution of aldehyde hydrazone (5 mmol) in dry THF (20 mL) was added NaH (60%, 50 mmol) at 0 °C. The mixture was stirred at 0 °C for 15 min, and then MeI (7.5 mmol) was added dropwise. The reaction mixture was stirring at room temperature for 3 h then refluxed for another 2 h. The reaction mixture was cooled to the room temperature, and the solvent was removed under reduced pressure with a rotary evaporator. The residue was diluted with water, extracted with ethyl acetate, and dried over  $\text{MgSO}_4$ . After removal of the solvent, the residue was purified

<sup>1</sup> a) N. Giuseppone, J. L. Schmitt, E. Schwartz, J. M. Lehn, *J. Am. Chem. Soc.* **2005**, *127*, 5528; b) R. F. Smith, L. A. Dennis, W. J. Ryan, G. Rodriguez, K. A. Brophy, *J. Heterocycl. Chem.* **1992**, *29*, 181; c) S. Zhou, J. Wang, F. Zhang, C. Song, J. Zhu, *Org. Lett.* **2016**, *18*, 2427.

<sup>2</sup> S. D. Sharma, S. B. Pandhi, *J. Org. Chem.* **1990**, *55*, 2196.

by silica gel column chromatography to give the product **1**.

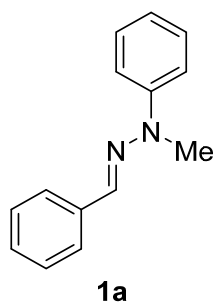

The title compound **1a** was prepared according to the general procedure **A** as slightly yellow solid, m.p. 106-107 °C. <sup>1</sup>H NMR (400 MHz, CDCl<sub>3</sub>): δ = 7.69 (d, *J* = 7.6 Hz, 2H), 7.48 (s, 1H), 7.39-7.30 (m, 6H), 7.27-7.24 (m, 1H), 6.93 (t, *J* = 7.2 Hz, 1H), 3.41 (s, 3H); <sup>13</sup>C NMR (100 MHz, CDCl<sub>3</sub>): δ 147.9, 136.8, 131.9, 129.1, 128.6, 127.7, 126.1, 120.6, 115.3, 33.1 ppm. MS (ESI, *m/z*): 211.05([M+H<sup>+</sup>]).

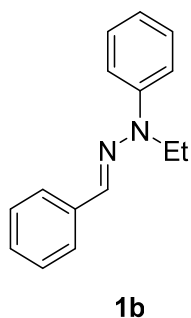

The title compound **1b** was prepared according to the general procedure **A** as yellow solid, m.p. 50-51 °C. <sup>1</sup>H NMR (400 MHz, CDCl<sub>3</sub>): δ = 7.70-7.68 (m, 2H), 7.52(s, 1H), 7.37-7.27 (m, 6H), 7.26-7.19 (m, 1H), 6.93-6.90 (m, 1H), 3.97 (q, *J* = 7.2 Hz, 2H), 3.41 (t, *J* = 7.2 Hz, 3H); <sup>13</sup>C NMR (100 MHz, CDCl<sub>3</sub>): δ 146.9, 137.0, 131.0, 129.2, 128.7, 127.8, 126.1, 120.4, 114.7, 39.5, 10.2 ppm. MS (ESI, *m/z*): 225.05([M+H<sup>+</sup>]).

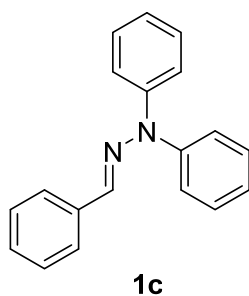

The title compound **1c** was prepared according to the general procedure **A** as white solid, m.p. 126-127 °C. <sup>1</sup>H NMR (400 MHz, CDCl<sub>3</sub>): δ = 7.60 (d, *J* = 7.6 Hz, 2H), 7.42 (s, *J* = 7.6 Hz, 4H), 7.33 (t, *J* = 7.6 Hz, 2H), 7.27-7.24 (m, 1H), 7.21-7.15 (m, 6H), 7.15 (s, 1H); <sup>13</sup>C NMR (100 MHz, CDCl<sub>3</sub>): δ 143.7, 136.2, 135.5, 129.8, 128.6, 128.1, 126.3, 124.5, 122.6 ppm. MS (ESI, *m/z*): 273.05([M+H<sup>+</sup>]).

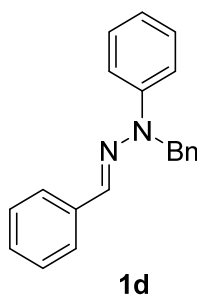

The title compound **1d** was prepared according to the general procedure **A** as white solid, m.p. 111-112 °C. <sup>1</sup>H NMR (400 MHz, CDCl<sub>3</sub>): δ = 7.62 (d, *J* = 8.0 Hz, 2H), 7.31 (d, *J* = 8.0 Hz, 2H), 7.39 (s, 1H), 7.36-7.30 (m, 6H), 7.28-7.25 (m, 3H), 7.23-7.22 (m, 1H), 6.95 (t, *J* = 7.2 Hz, 1H), 5.19 (s, 2H); <sup>13</sup>C NMR (100 MHz, CDCl<sub>3</sub>): δ 147.9, 136.6, 135.7, 132.5, 129.2, 129.0, 128.6, 127.9, 127.3, 126.2, 126.0, 120.8, 114.8, 50.5 ppm. MS (ESI, *m/z*): 287.05([M+H<sup>+</sup>]).

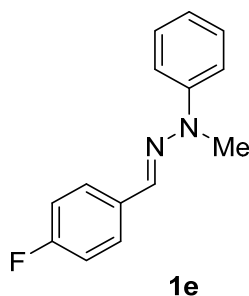

The title compound **1e** was prepared according to the general procedure **A** as white solid, m.p. 108-109 °C. <sup>1</sup>H NMR (400 MHz, CDCl<sub>3</sub>): δ = 7.68-7.65 (m, 2H), 7.46 (s, 1H), 7.36 (d, *J* = 8.0 Hz, 2H), 7.34-7.30 (m, 2H), 7.06 (t, *J* = 8.4 Hz, 2H), 6.94 (t, *J* = 7.2 Hz, 1H); <sup>13</sup>C NMR (100 MHz, CDCl<sub>3</sub>): δ 162.5 (d, *J* = 245.5 Hz), 147.8, 133.0 (d, *J* = 3.2 Hz), 130.7, 129.1, 127.6 (d, *J* = 6.8 Hz), 120.7, 115.5 (d, *J* = 21.6 Hz), 115.3, 33.1 ppm. MS (ESI, *m/z*): 229.05([M+H<sup>+</sup>]).

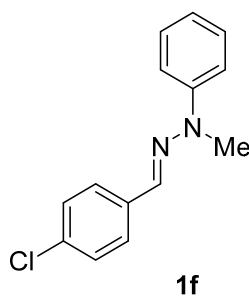

The title compound **1f** was prepared according to the general procedure **A** as yellow solid, m.p. 110-111 °C. <sup>1</sup>H NMR (400 MHz, CDCl<sub>3</sub>): δ = 7.63-7.61 (m, 2H), 7.43 (s, 1H), 7.38-7.30 (m, 6H), 6.95 (t, *J* = 7.2 Hz, 1H), 7.21-7.19 (m, 1H), 6.97-6.95 (m, 1H), 3.42 (s, 3H); <sup>13</sup>C NMR (100 MHz, CDCl<sub>3</sub>): δ 147.7, 135.4, 133.2, 130.4, 129.1, 128.8, 127.1, 120.9, 115.4, 33.2 ppm. MS (ESI, *m/z*): 245.00([M+H<sup>+</sup>]).

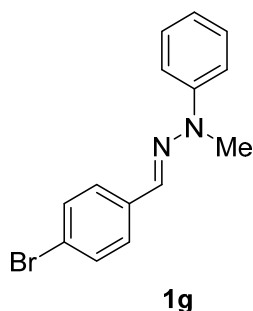

The title compound **1g** was prepared according to the general procedure **A** as white solid, m.p. 127-128 °C. <sup>1</sup>H NMR (400 MHz, CDCl<sub>3</sub>): δ = 7.57-7.54 (m, 2H), 7.49-7.47 (m, 2H), 7.41 (s, 1H), 7.38-7.31 (m, 4H), 6.95 (d, *J* = 7.2 Hz, 1H), 3.42 (s, 3H); <sup>13</sup>C NMR (100 MHz, CDCl<sub>3</sub>): δ 147.7, 135.8, 131.7, 130.4, 129.1, 127.5, 121.3, 120.9, 115.4, 33.2 ppm. MS (ESI, *m/z*): 288.95([M+H<sup>+</sup>]).

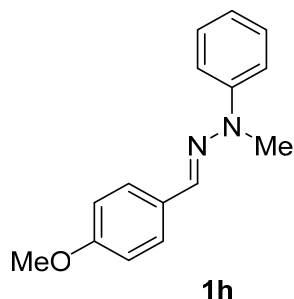

The title compound **1h** was prepared according to the general procedure **A** as white solid, m.p. 116-117 °C. <sup>1</sup>H NMR (400 MHz, CDCl<sub>3</sub>): δ = 7.64 (d, *J* = 8.8 Hz, 2H), 7.48 (s, 1H), 7.36 (d, *J* = 8.0 Hz, 2H), 7.31 (t, *J* = 8.0 Hz, 2H), 6.92-6.89 (m, 3H), 3.83 (s, 3H), 3.40 (s, 3H); <sup>13</sup>C NMR (100 MHz, CDCl<sub>3</sub>): δ 159.5, 148.1, 131.9, 129.7, 129.0, 127.4, 120.2, 115.1, 114.1, 55.4, 33.0 ppm. MS (ESI, *m/z*): 241.05([M+H<sup>+</sup>]).

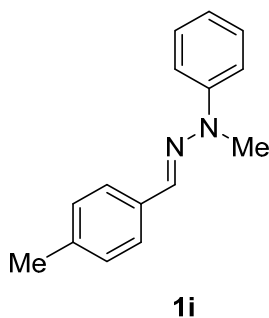

The title compound **1i** was prepared according to the general procedure **A** as white solid, m.p. 121-122 °C. <sup>1</sup>H NMR (400 MHz, CDCl<sub>3</sub>): δ = 7.59 (d, *J* = 8.0 Hz, 2H), 7.49 (s, 1H), 7.39-7.37 (m, 2H), 7.34-7.30 (m, 2H), 7.17 (d, *J* = 8.0 Hz, 2H), 6.92 (t, *J* = 7.2 Hz, 1H), 3.41 (s, 3H), 2.36 (s, 3H) ppm; <sup>13</sup>C NMR (100 MHz, CDCl<sub>3</sub>): δ 148.0, 137.7, 134.1, 132.1, 129.3, 129.0, 126.0, 120.4, 115.2, 33.0, 21.4 ppm. MS (ESI, *m/z*): 225.05([M+H<sup>+</sup>]).

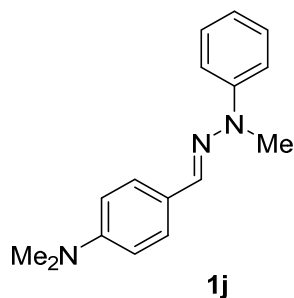

The title compound **1j** was prepared according to the general procedure **A** as yellow solid, m.p. 149-150 °C. <sup>1</sup>H NMR (400 MHz, CDCl<sub>3</sub>): δ = 7.61-7.58 (m, 2H), 7.49 (s, 1H), 7.37-7.35 (m, 2H), 7.32-7.28 (m, 2H), 6.89-6.86 (m, 1H), 6.74-6.72 (m, 2H), 3.39 (s, 3H), 2.99 (s, 6H) ppm; <sup>13</sup>C NMR (100 MHz, CDCl<sub>3</sub>): δ 150.4, 148.3, 133.2, 129.0, 127.3, 125.3, 119.7, 114.8, 112.4, 40.5, 33.0 ppm. MS (ESI, *m/z*): 254.05([M+H<sup>+</sup>]).

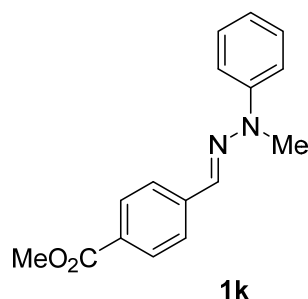

The title compound **1k** was prepared according to the general procedure **A** as yellow solid, m.p. 105-106 °C. <sup>1</sup>H NMR (400 MHz, CDCl<sub>3</sub>): δ = 8.03 (d, *J* = 7.6 Hz, 2H), 7.73 (d, *J* = 8.0 Hz, 2H), 7.48 (s, 1H), 7.41-7.39 (m, 2H), 7.36-7.32 (m, 2H), 7.00-6.98 (m, 1H), 6.74-6.72 (m, 2H), 3.92 (s, 3H), 3.45 (s, 3H) ppm; <sup>13</sup>C NMR (100 MHz, CDCl<sub>3</sub>): δ 167.1, 147.6, 141.2, 130.3, 130.0, 129.1, 128.7, 125.7, 121.3, 115.6, 52.1, 33.3 ppm. MS (ESI, *m/z*): 269.05([M+H<sup>+</sup>]).

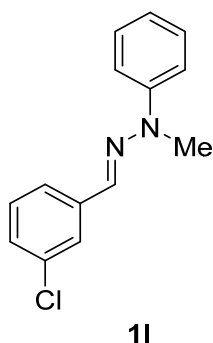

The title compound **1l** was prepared according to the general procedure **A** as slightly yellow solid, m.p. 69-70 °C. <sup>1</sup>H NMR (400 MHz, CDCl<sub>3</sub>): δ = 7.70 (t, *J* = 2.0 Hz, 1H), 7.52 (d, *J* = 7.6 Hz, 2H), 7.40-7.30 (m, 5H), 7.28-7.25 (m, 1H), 7.23-7.20 (m, 1H), 3.42 (s, 3H) ppm; <sup>13</sup>C NMR (100 MHz, CDCl<sub>3</sub>): δ 147.6, 138.7, 134.6, 130.1, 129.8, 129.1, 127.5, 125.7, 124.3, 121.1, 115.5, 33.3 ppm. MS (ESI, *m/z*): 245.00([M+H<sup>+</sup>]).

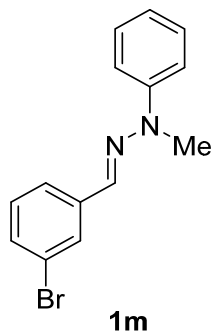

The title compound **1m** was prepared according to the general procedure **A** as brown solid, m.p. 87-88 °C. <sup>1</sup>H NMR (400 MHz, CDCl<sub>3</sub>): δ = 7.83 (s, 1H), 7.53 (d, *J* = 8.0 Hz, 1H), 7.36-7.30 (m, 6H), 7.19 (t, *J* = 8.0 Hz, 1H), 6.96-6.94 (m, 1H), 3.36 (s, 3H) ppm; <sup>13</sup>C NMR (100 MHz, CDCl<sub>3</sub>): δ 147.6, 139.0, 130.4, 130.1, 129.9, 129.1, 128.6, 124.8, 122.9, 121.1, 115.5, 33.3 ppm. MS (ESI, *m/z*): 288.95([M+H<sup>+</sup>]).

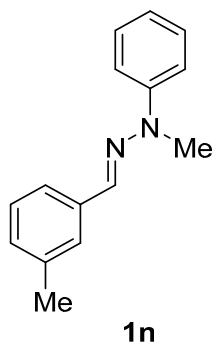

The title compound **1n** was prepared according to the general procedure **A** as yellow solid, m.p. 87-88 °C. <sup>1</sup>H NMR (400 MHz, CDCl<sub>3</sub>): δ = 7.53 (s, 1H), 7.48 (d, *J* = 8.4 Hz, 2H), 7.38 (d, *J* = 8.0 Hz, 2H), 7.34-7.30 (m, 2H), 7.25 (d, *J* = 6.4 Hz, 1H), 7.08 (d, *J* = 7.6 Hz, 1H), 6.93 (t, *J* = 7.2 Hz, 1H), 3.41 (s, 3H), 3.39 (s, 3H) ppm; <sup>13</sup>C NMR (100 MHz, CDCl<sub>3</sub>): δ 148.0, 138.2, 136.7, 132.2, 129.1, 128.6, 128.5, 126.6, 123.5, 120.5, 115.3, 33.1, 21.5 ppm. MS (ESI, *m/z*): 225.05([M+H<sup>+</sup>]).

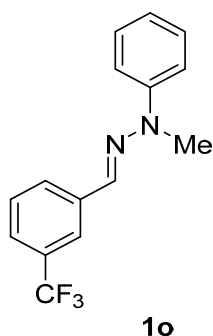

The title compound **1o** was prepared according to the general procedure **A** as slightly yellow solid, m.p. 88-89 °C. <sup>1</sup>H NMR (400 MHz, CDCl<sub>3</sub>): δ = 7.91 (s, 1H), 7.86 (d, *J* = 7.2 Hz, 1H), 7.50-7.46 (m, 3H), 7.40-7.33 (m, 4H), 7.00-6.98 (m, 1H), 3.44 (s, 3H) ppm; <sup>13</sup>C NMR (100 MHz, CDCl<sub>3</sub>): δ 147.6, 137.7, 131.0 (q, *J* = 31.2 Hz), 130.0,

129.2, 129.0, 128.9, 124.2 (q,  $J = 270.8$  Hz), 123.9 (q,  $J = 3.9$  Hz), 123.9 (q,  $J = 4.0$  Hz), 121.2, 115.6, 33.3 ppm. MS (ESI,  $m/z$ ): 279.00([M+H<sup>+</sup>]).

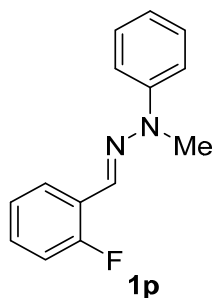

The title compound **1p** was prepared according to the general procedure **A** as white solid, m.p. 81-82 °C. <sup>1</sup>H NMR (400 MHz, CDCl<sub>3</sub>):  $\delta = 8.04$ -8.00 (m, 1H), 7.66 (s, 1H), 7.39-7.37 (m, 2H), 7.37-7.30 (m, 2H), 7.23-7.18 (m, 1H), 7.14 (t,  $J = 7.2$  Hz), 7.07-7.02 (m, 1H), 6.96-6.92 (m, 1H), 3.42 (s, 3H) ppm; <sup>13</sup>C NMR (100 MHz, CDCl<sub>3</sub>):  $\delta$  160.6 (d,  $J = 246.6$  Hz), 147.8, 129.1, 128.8 (d,  $J = 8.2$  Hz), 125.8 (d,  $J = 4.2$  Hz), 124.6 (d,  $J = 4.9$  Hz), 124.5, 124.2 (d,  $J = 2.5$  Hz), 120.9, 115.6, 115.4, 33.2 ppm. MS (ESI,  $m/z$ ): 229.05([M+H<sup>+</sup>]).

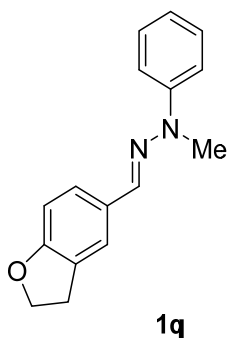

The title compound **1q** was prepared according to the general procedure **A** as brown solid, m.p. 120-121 °C. <sup>1</sup>H NMR (400 MHz, CDCl<sub>3</sub>):  $\delta = 7.64$  (s, 1H), 7.45 (s, 1H), 7.34 (d,  $J = 7.6$  Hz, 3H), 7.32-7.28 (m, 2H), 6.89 (t,  $J = 7.2$  Hz, 1H), 6.76 (d,  $J = 8.0$  Hz, 1H), 4.57 (t,  $J = 8.8$  Hz, 2H), 3.35 (s, 3H), 3.21 (t,  $J = 8.8$  Hz, 2H) ppm; <sup>13</sup>C NMR (100 MHz, CDCl<sub>3</sub>):  $\delta$  160.2, 148.1, 132.5, 129.8, 129.1, 127.8, 127.1, 122.1, 120.1, 115.0, 109.2, 71.6, 33.0, 29.6 ppm. MS (ESI,  $m/z$ ): 253.05([M+H<sup>+</sup>]).

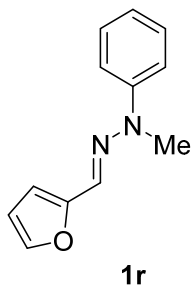

The title compound **1r** was prepared according to the general procedure **A** as slightly yellow solid, m.p. 54-55 °C. <sup>1</sup>H NMR (400 MHz, CDCl<sub>3</sub>):  $\delta = 7.43$ -7.24 (m, 6H), 6.93 (t,  $J = 6.4$  Hz, 1H), 6.53 (s, 1H), 6.45-6.44 (m, 1H), 3.36 (s, 3H) ppm; <sup>13</sup>C NMR (100 MHz, CDCl<sub>3</sub>):  $\delta$  152.4, 147.6, 142.2, 129.1, 122.8, 120.9, 115.6, 111.5, 107.6, 33.3



ppm. MS (ESI,  $m/z$ ): 201.00([M+H<sup>+</sup>]).

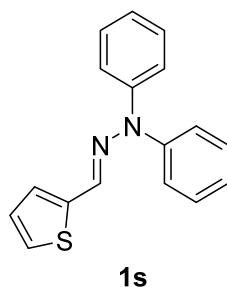

The title compound **1s** was prepared according to the general procedure **A** as slightly green solid, m.p. 129-130 °C. <sup>1</sup>H NMR (400 MHz, CDCl<sub>3</sub>):  $\delta$  = 7.43-7.39 (m, 4H), 7.30 (s, 1H), 7.21-7.17 (m, 7H), 6.95-6.94 (m, 1H), 6.91-6.90 (m, 1H) ppm; <sup>13</sup>C NMR (100 MHz, CDCl<sub>3</sub>):  $\delta$  143.4, 141.9, 130.5, 129.9, 127.2, 126.4, 125.5, 124.7, 122.5 ppm. MS (ESI,  $m/z$ ): 278.95([M+H<sup>+</sup>]).

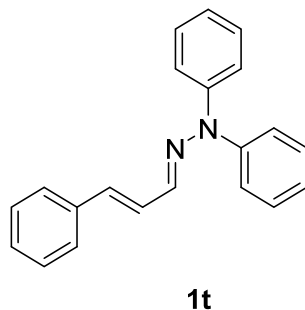

The title compound **1t** was prepared according to the general procedure **A** as slightly green solid, m.p. 130-131 °C. <sup>1</sup>H NMR (400 MHz, CDCl<sub>3</sub>):  $\delta$  = 7.43-7.38 (m, 6H), 7.31 (t,  $J$  = 7.6 Hz, 2H), 7.25-7.14 (m, 7H), 7.09-7.04 (m, 2H), 6.53-6.45 (m, 1H) ppm; <sup>13</sup>C NMR (100 MHz, CDCl<sub>3</sub>):  $\delta$  143.5, 138.3, 137.0, 134.1, 129.8, 128.7, 127.8, 126.9, 126.4, 124.6, 122.5 ppm. MS (ESI,  $m/z$ ): 299.05([M+H<sup>+</sup>]).

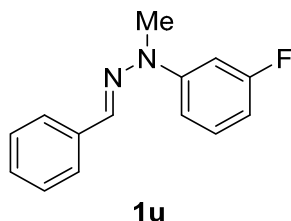

The title compound **1u** was prepared according to the general procedure **B** as pink solid, m.p. 124-125 °C. <sup>1</sup>H NMR (400 MHz, CDCl<sub>3</sub>):  $\delta$  = 7.68 (d,  $J$  = 7.6 Hz, 2H), 7.50 (s, 1H), 7.37 (t,  $J$  = 7.6 Hz, 2H), 7.28 (d,  $J$  = 7.2 Hz, 1H), 7.24-7.15 (m, 2H), 7.05 (dd,  $J$  = 2.0 Hz, 8.4 Hz, 1H), 6.60 (dt,  $J$  = 2.4 Hz, 8.0 Hz, 1H), 3.37 (s, 3H) ppm; <sup>13</sup>C NMR (100 MHz, CDCl<sub>3</sub>):  $\delta$  163.8 (d,  $J$  = 241.2 Hz), 139.5 (d,  $J$  = 11.1 Hz), 136.4, 132.9, 130.0 (d,  $J$  = 9.7 Hz), 128.7, 128.2, 126.3, 110.0 (d,  $J$  = 2.3 Hz), 106.8 (d,  $J$  = 21.4 Hz), 102.4 (d,  $J$  = 26.9 Hz), 32.8 ppm. MS (ESI,  $m/z$ ): 229.05([M+H<sup>+</sup>]).

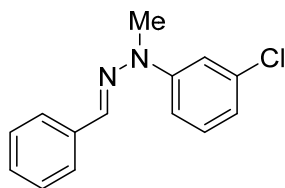

**1v**

The title compound **1v** was prepared according to the general procedure **B** as white solid, m.p. 100-101 °C. <sup>1</sup>H NMR (400 MHz, CDCl<sub>3</sub>): δ = 7.69 (d, *J* = 8.4 Hz, 2H), 7.51 (s, 1H), 7.40-7.36 (m, 3H), 7.28 (t, *J* = 7.6 Hz, 1H), 7.21-7.20 (m, 2H), 6.89-6.86 (m, 1H), 6.60 (dt, *J* = 2.4 Hz, 8.0 Hz, 1H), 3.38 (s, 3H) ppm; <sup>13</sup>C NMR (100 MHz, CDCl<sub>3</sub>): δ 148.9, 136.3, 134.9, 133.1, 130.0, 128.7, 128.2, 126.3, 120.2, 115.2, 112.9, 32.8 ppm. MS (ESI, *m/z*): 245.00([M+H<sup>+</sup>]).

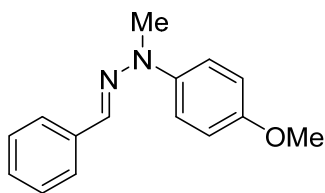

**1w**

The title compound **1w** was prepared according to the general procedure **B** as yellow solid, m.p. 131-132 °C. <sup>1</sup>H NMR (400 MHz, CDCl<sub>3</sub>): δ = 7.67 (d, *J* = 7.6 Hz, 2H), 7.42 (s, 1H), 7.35 (t, *J* = 8.0 Hz, 2H), 7.30-7.24 (m, 3H), 6.91-6.88 (m, 2H), 3.80 (s, 3H), 3.39 (s, 3H) ppm; <sup>13</sup>C NMR (100 MHz, CDCl<sub>3</sub>): δ 154.3, 142.4, 137.0, 131.2, 128.6, 127.4, 125.9, 117.2, 114.4, 55.7, 34.3 ppm. MS (ESI, *m/z*): 241.05([M+H<sup>+</sup>]).

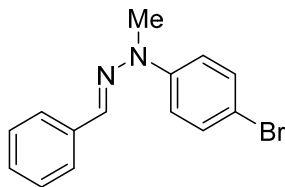

**1x**

The title compound **1x** was prepared according to the general procedure **B** as yellow solid, m.p. 104-105 °C. <sup>1</sup>H NMR (400 MHz, CDCl<sub>3</sub>): δ = 7.68 (d, *J* = 7.2 Hz, 2H), 7.50 (s, 1H), 7.41-7.35 (m, 4H), 7.30-7.28 (m, 1H), 7.26-7.24 (m, 2H), 3.38 (s, 3H) ppm; <sup>13</sup>C NMR (100 MHz, CDCl<sub>3</sub>): δ 146.9, 136.4, 132.7, 131.8, 128.7, 128.1, 126.2, 116.7, 112.8, 32.9 ppm. MS (ESI, *m/z*): 290.95([M+H<sup>+</sup>]).

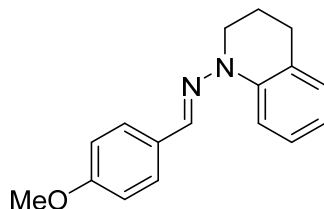

**3a**

The title compound **3a** was prepared according to the general procedure **A** as yellow solid, m.p. 101-102 °C. <sup>1</sup>H NMR (400 MHz, CDCl<sub>3</sub>): δ = 7.75 (d, *J* = 7.6 Hz, 1H), 7.64-7.61 (m, 2H), 7.47 (s, 1H), 7.20-7.17 (m, 1H), 6.99 (d, *J* = 6.4 Hz, 1H),

6.91-6.88 (m, 2H), 6.76 (dt,  $J = 1.2$  Hz, 7.6 Hz, 1H), 3.81 (s, 3H), 3.61 (t,  $J = 6.4$  Hz, 2H), 2.73 (t,  $J = 6.4$  Hz, 2H), 2.16-2.10 (m, 2H) ppm;  $^{13}\text{C}$  NMR (100 MHz,  $\text{CDCl}_3$ ):  $\delta$  159.4, 143.2, 130.5, 130.0, 128.2, 127.4, 127.3, 123.4, 119.2, 114.2, 114.1, 55.4, 44.7, 27.2, 22.0 ppm. MS (ESI,  $m/z$ ): 267.05 ( $[\text{M}+\text{H}^+]$ ).

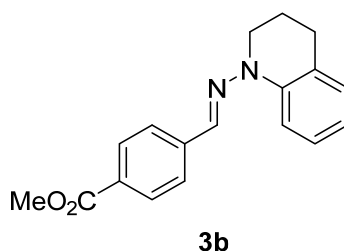

The title compound **3b** was prepared according to the general procedure **A** as yellow solid, m.p. 129-130 °C.  $^1\text{H}$  NMR (400 MHz,  $\text{CDCl}_3$ ):  $\delta$  = 8.03-8.00 (m, 2H), 7.77 (d,  $J = 8.0$  Hz, 1H), 7.73-7.71 (m, 2H), 7.48 (s, 1H), 7.24-7.20 (m, 1H), 7.02 (d,  $J = 7.6$  Hz, 1H), 7.02 (dt,  $J = 1.2$  Hz, 7.6 Hz, 1H), 3.91 (s, 3H), 3.65 (t,  $J = 6.4$  Hz, 2H), 2.75 (t,  $J = 6.4$  Hz, 2H), 2.19-2.13 (m, 2H) ppm;  $^{13}\text{C}$  NMR (100 MHz,  $\text{CDCl}_3$ ):  $\delta$  167.1, 142.6, 141.5, 130.0, 129.0, 128.6, 128.3, 127.5, 125.6, 124.1, 120.3, 114.7, 52.1, 45.1, 27.0, 21.9 ppm. MS (ESI,  $m/z$ ): 295.05( $[\text{M}+\text{H}^+]$ ).

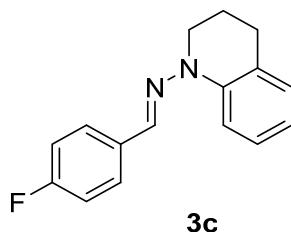

The title compound **3c** was prepared according to the general procedure **A** as white solid, m.p. 113-114 °C.  $^1\text{H}$  NMR (400 MHz,  $\text{CDCl}_3$ ):  $\delta$  = 7.73 (d,  $J = 8.0$  Hz, 1H), 7.66-7.63 (m, 2H), 7.44 (s, 1H), 7.22-7.19 (m, 1H), 7.06-7.00 (m, 3H), 6.79 (t,  $J = 7.6$  Hz, 1H), 3.60 (t,  $J = 6.0$  Hz, 2H), 2.73 (t,  $J = 6.0$  Hz, 2H), 2.16-2.12 (m, 2H) ppm;  $^{13}\text{C}$  NMR (100 MHz,  $\text{CDCl}_3$ ):  $\delta$  162.4 (d,  $J = 244.5$  Hz), 142.9, 133.2 (d,  $J = 2.6$  Hz), 129.3, 128.2, 127.5, 127.4 (d,  $J = 1.9$  Hz), 123.6, 119.6, 115.6, 115.4, 114.3, 44.8, 27.0, 21.9 ppm. MS (ESI,  $m/z$ ): 255.05( $[\text{M}+\text{H}^+]$ ).

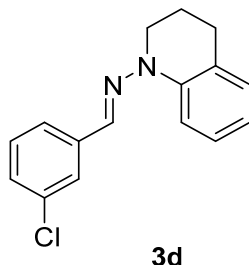

The title compound **3d** was prepared according to the general procedure **A** as yellow solid, m.p. 56-57 °C.  $^1\text{H}$  NMR (400 MHz,  $\text{CDCl}_3$ ):  $\delta$  = 7.74 (d,  $J = 8.4$  Hz, 1H), 7.68 (t,  $J = 2.0$  Hz, 1H), 7.49 (dt,  $J = 1.2$  Hz, 7.6 Hz, 1H), 7.37 (s, 1H), 7.27-7.17 (m, 3H), 7.00 (d,  $J = 7.2$  Hz, 1H), 6.81 (dt,  $J = 1.2$  Hz, 7.2 Hz, 1H), 3.59 (t,  $J = 6.4$  Hz, 2H), 2.72 (t,  $J = 6.4$  Hz, 2H), 2.16-2.09 (m, 2H) ppm;  $^{13}\text{C}$  NMR (100 MHz,  $\text{CDCl}_3$ ):  $\delta$

142.7, 139.0, 134.6, 129.8, 128.7, 128.4, 127.5, 1274, 125.6, 124.3, 123.9, 120.0, 114.6, 45.0, 27.0, 21.9 ppm. MS (ESI,  $m/z$ ): 271.00([M+H<sup>+</sup>]).

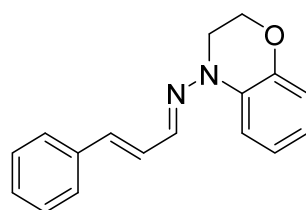

**3e**

The title compound **3e** was prepared according to the general procedure **A** as slightly green solid, m.p. 106-107 °C. <sup>1</sup>H NMR (400 MHz, CDCl<sub>3</sub>): δ = 7.64 (d,  $J$  = 8.4 Hz, 1H), 7.45 (d,  $J$  = 8.0 Hz, 2H), 7.39 (d,  $J$  = 8.8 Hz, 1H), 7.34 (t,  $J$  = 7.2 Hz, 2H), 7.25 (t,  $J$  = 7.2 Hz, 1H), 7.12-7.05 (m, 1H), 6.98-6.94 (m, 1H), 6.86 (d,  $J$  = 8.0 Hz, 1H), 6.81-6.71 (m, 2H), 4.37 (t,  $J$  = 4.4 Hz, 2H), 3.71 (t,  $J$  = 4.4 Hz, 2H) ppm; <sup>13</sup>C NMR (100 MHz, CDCl<sub>3</sub>): δ 143.5, 137.0, 134.9, 133.8, 132.6, 128.8, 127.9, 127.1, 126.5, 122.5, 120.5, 116.8, 114.4, 63.5, 43.0 ppm. MS (ESI,  $m/z$ ): 265.05

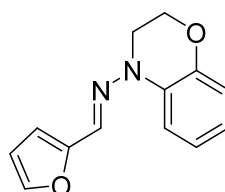

**3f**

The title compound **3f** was prepared according to the general procedure **A** as yellow solid, m.p. 75-76 °C. <sup>1</sup>H NMR (400 MHz, CDCl<sub>3</sub>): δ = 7.69 (dd,  $J$  = 1.6 Hz, 8.0 Hz, 1H), 7.46-7.45 (m, 1H), 7.39 (s, 1H), 6.99-6.94 (m, 1H), 6.87-6.85 (m, 1H), 6.81-6.77 (m, 1H), 6.57 (d,  $J$  = 3.2 Hz, 1H), 6.46-6.45 (m, 1H), 4.38 (t,  $J$  = 4.8 Hz, 2H), 3.70 (t,  $J$  = 4.8 Hz, 2H) ppm; <sup>13</sup>C NMR (100 MHz, CDCl<sub>3</sub>): δ 151.8, 143.5, 142.6, 132.6, 123.0, 122.5, 120.6, 116.7, 114.7, 111.6, 108.3, 63.5, 42.9 ppm. MS (ESI,  $m/z$ ): 229.05([M+H<sup>+</sup>]).

### 3. General procedure for Rh(III)-Catalyzed C-H/C-H bonds cross coupling of aldehyde hydrazone

An oven-dried Schlenk tube (10 mL) was equipped with a magnetic stir bar, **1** or **3** (0.2 mmol), [RhCp\*Cl<sub>2</sub>]<sub>2</sub> (0.025 equiv, 0.005 mmol, 3.1 mg), AgOTf (0.10 equiv, 0.02 mmol, 5.1 mg), Cu(OAc)<sub>2</sub> (2.0 equiv, 0.40 mmol, 72 mg), K<sub>2</sub>CO<sub>3</sub> (1.0 equiv, 0.20 mmol, 27 mg). The flask was evacuated and backfilled with Argon for 3 times. 0.5 mL DCE was added with syringe under Argon. The resulting solution was stirred at 120°C for 24 h. Then the mixture was concentrated under vacuum to remove DCE, and the residue was purified by chromatography on silica gel to afford the **2** or **4**.

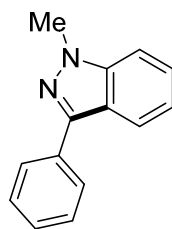

**2a**

Following general procedure, the crude product was purified by flash column chromatography (15:1 petroleum ether: ethyl acetate) to afford **2a** (33.3 mg, 80% yield) as yellow solid. m.p. 69-70 °C. Reaction time: 24h. <sup>1</sup>H NMR (400 MHz, CDCl<sub>3</sub>): δ = 7.92 (d, *J* = 8.0 Hz, 1H), 7.87 (d, *J* = 8.0 Hz, 2H), 7.41 (t, *J* = 7.6 Hz, 2H), 7.33-7.28 (m, 3H), 7.15-7.10 (m, 1H), 4.03 (s, 3H) ppm; <sup>13</sup>C NMR (100 MHz, CDCl<sub>3</sub>): δ 143.8, 141.5, 133.7, 128.8, 127.9, 127.4, 126.3, 121.6, 121.4, 121.0, 109.2, 35.6 ppm. HRMS (ESI) *m/z* calcd for C<sub>14</sub>H<sub>13</sub>N<sub>2</sub> [M+H]<sup>+</sup>: 209.1073, found: 209.1073.

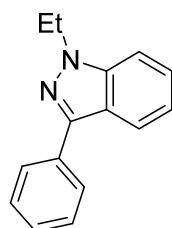

**2b**

Following general procedure, the crude product was purified by flash column chromatography (20:1 petroleum ether: ethyl acetate) to afford **2b** (41.4 mg, 92% yield) as slight yellow oil. Reaction time: 24h. <sup>1</sup>H NMR (400 MHz, CDCl<sub>3</sub>): δ = 8.00 (d, *J* = 8.0 Hz, 1H), 7.97-7.95 (m, 2H), 7.49 (t, *J* = 8.0 Hz, 2H), 7.42-7.35 (m, 3H), 7.20-7.16 (m, 1H), 4.46 (q, *J* = 7.6 Hz, 2H), 1.53 (t, *J* = 7.6 Hz, 3H); <sup>13</sup>C NMR (100 MHz, CDCl<sub>3</sub>): δ 143.7, 140.5, 133.9, 128.9, 127.8, 127.5, 126.2, 121.8, 121.5, 120.9, 109.3, 43.9, 15.1 ppm. HRMS (ESI) *m/z* calcd for C<sub>15</sub>H<sub>15</sub>N<sub>2</sub> [M+H]<sup>+</sup>: 223.1230, found: 223.1231.

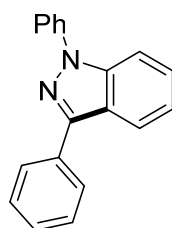

**2c**

Following general procedure, the crude product was purified by flash column chromatography (15:1 petroleum ether: ethyl acetate) to afford **2c** (51.2 mg, 95% yield) as slight yellow solid. m.p. 110-111 °C. Reaction time: 24h. <sup>1</sup>H NMR (400 MHz, CDCl<sub>3</sub>): δ = 8.08-8.03 (m, 3H), 7.80-7.75 (m, 3H), 7.55-7.50 (m, 4H), 7.45-7.40 (m, 2H), 7.37-7.32 (m, 1H), 7.28-7.24 (m, 1H) ppm; <sup>13</sup>C NMR (100 MHz, CDCl<sub>3</sub>): δ 146.2, 140.4, 140.2, 133.3, 129.5, 128.9, 128.3, 127.8, 127.2, 126.7, 123.1,

122.0, 121.7, 117.9, 110.7 ppm. HRMS (ESI)  $m/z$  calcd for  $C_{19}H_{15}N_2$   $[M+H]^+$ : 271.1230, found: 271.1231.

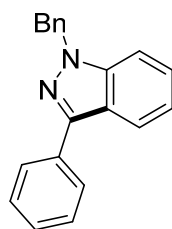

**2d**

Following general procedure, the crude product was purified by flash column chromatography (15:1 petroleum ether: ethyl acetate) to afford **2d** (44.5 mg, 78% yield) as slight yellow solid. m.p. 65-66 °C. Reaction time: 24h.  $^1H$  NMR (400 MHz,  $CDCl_3$ ):  $\delta$  = 7.94-7.90 (m, 3H), 7.42-7.39 (m, 2H), 7.32-7.27 (m, 1H), 7.24-7.23 (m, 2H), 7.20-7.07 (m, 6H), 5.54 (s, 2H) ppm;  $^{13}C$  NMR (100 MHz,  $CDCl_3$ ):  $\delta$  144.2, 141.1, 137.0, 133.7, 128.9, 128.8, 128.0, 127.8, 127.6, 127.2, 126.5, 122.2, 121.5, 121.2, 109.7, 53.1 ppm. HRMS (ESI)  $m/z$  calcd for  $C_{20}H_{17}N_2$   $[M+H]^+$ : 285.1386, found: 285.1390.

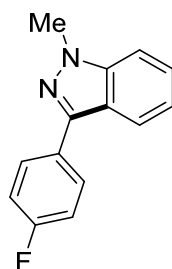

**2e**

Following general procedure, the crude product was purified by flash column chromatography (15:1 petroleum ether: ethyl acetate) to afford **2e** (30.1 mg, 67% yield) as white solid. m.p. 97-98 °C. Reaction time: 24h.  $^1H$  NMR (400 MHz,  $CDCl_3$ ):  $\delta$  = 7.87-7.83 (m, 2H), 7.82-7.81 (m, 1H), 7.33-7.32 (m, 2H), 7.12-7.07 (m, 3H), 4.01 (s, 3H) ppm;  $^{13}C$  NMR (100 MHz,  $CDCl_3$ ):  $\delta$  162.6 (d,  $J$  = 245.4 Hz), 142.8, 141.4, 129.9 (d,  $J$  = 2.7 Hz), 129.0 (d,  $J$  = 8.3 Hz), 126.4, 121.5, 121.0 (d,  $J$  = 4.3 Hz), 115.9, 115.7, 109.3, 35.6 ppm. HRMS (ESI)  $m/z$  calcd for  $C_{14}H_{12}FN_2$   $[M+H]^+$ : 227.0979, found: 227.0979.

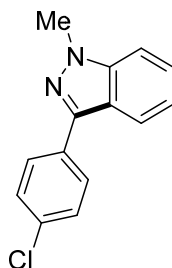

**2f**

Following general procedure, the crude product was purified by flash column chromatography (15:1 petroleum ether: ethyl acetate) to afford **2f** (32.0 mg, 66% yield) as yellow solid, m.p. 105-106 °C. Reaction time: 24h.  $^1H$  NMR (400 MHz,  $CDCl_3$ ):  $\delta$

= 7.95 (d,  $J = 8.0$  Hz, 1H), 7.90-7.88 (m, 2H), 7.47-7.45 (m, 2H), 7.43-7.41 (m, 2H), 7.24-7.20 (m, 1H), 4.11 (s, 3H) ppm;  $^{13}\text{C}$  NMR (100 MHz,  $\text{CDCl}_3$ ):  $\delta$  142.5, 141.5, 133.6, 132.2, 129.0, 128.5, 126.4, 121.5, 121.2, 121.1, 109.4, 35.6 ppm. HRMS (ESI)  $m/z$  calcd for  $\text{C}_{14}\text{H}_{12}\text{ClN}_2$   $[\text{M}+\text{H}]^+$ : 243.0684, found: 243.0684.

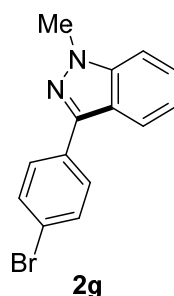

Following general procedure, the crude product was purified by flash column chromatography (20:1 petroleum ether: ethyl acetate) to afford **2g** (34.3 mg, 60% yield) as slight yellow solid. m.p. 89-90 °C. Reaction time: 24h.  $^1\text{H}$  NMR (400 MHz,  $\text{CDCl}_3$ ):  $\delta$  = 7.86 (d,  $J = 8.4$  Hz, 1H), 7.75 (d,  $J = 8.4$  Hz, 2H), 7.52 (d,  $J = 8.8$  Hz, 2H), 7.34-7.32 (m, 2H), 7.15-7.12 (m, 1H), 4.02 (s, 3H) ppm;  $^{13}\text{C}$  NMR (100 MHz,  $\text{CDCl}_3$ ):  $\delta$  142.2, 141.5, 135.5, 134.8, 130.1, 127.8, 127.3, 126.5, 125.4, 121.5, 121.3, 121.0, 109.4, 35.6 ppm. HRMS (ESI)  $m/z$  calcd for  $\text{C}_{14}\text{H}_{12}\text{BrN}_2$   $[\text{M}+\text{H}]^+$ : 287.0179, found: 297.0177.

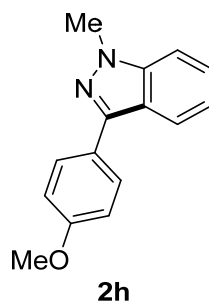

Following general procedure, the crude product was purified by flash column chromatography (10:1 petroleum ether: ethyl acetate) to afford **2h** (35.9 mg, 76% yield) as slight yellow oil. Reaction time: 24h.  $^1\text{H}$  NMR (400 MHz,  $\text{CDCl}_3$ ):  $\delta$  = 7.86 (d,  $J = 8.0$  Hz, 1H), 7.78 (d,  $J = 8.0$  Hz, 2H), 7.29-7.27 (m, 2H), 7.09-7.06 (m, 1H), 6.93 (d,  $J = 8.8$  Hz, 2H), 3.98 (s, 3H), 3.75 (s, 3H) ppm;  $^{13}\text{C}$  NMR (100 MHz,  $\text{CDCl}_3$ ):  $\delta$  159.5, 143.6, 141.4, 128.6, 126.4, 126.2, 121.5, 121.4, 120.7, 114.3, 109.2, 55.4, 35.5 ppm. HRMS (ESI)  $m/z$  calcd for  $\text{C}_{15}\text{H}_{15}\text{N}_2\text{O}$   $[\text{M}+\text{H}]^+$ : 239.1179, found: 239.1181.

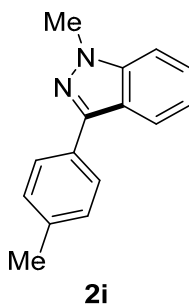

Following general procedure, the crude product was purified by flash column chromatography (20:1 petroleum ether: ethyl acetate) to afford **2i** (32.5 mg, 80% yield) as white solid. m.p. 61-62 °C. Reaction time: 24h. <sup>1</sup>H NMR (400 MHz, CDCl<sub>3</sub>): δ = 7.99 (d, *J* = 8.4 Hz, 1H), 7.84 (d, *J* = 8.0 Hz, 2H), 7.42-7.37 (m, 2H), 7.29 (d, *J* = 8.0 Hz, 2H), 7.20-7.16 (m, *J* = 8.8 Hz, 1H), 4.09 (s, 3H), 2.41 (s, 3H) ppm; <sup>13</sup>C NMR (100 MHz, CDCl<sub>3</sub>): δ 143.8, 141.4, 137.6, 130.9, 129.5, 127.3, 126.2, 121.6, 121.5, 120.8, 109.2, 35.5, 21.4 ppm. HRMS (ESI) *m/z* calcd for C<sub>15</sub>H<sub>15</sub>N<sub>2</sub> [M+H]<sup>+</sup>: 223.1230, found: 223.1232.

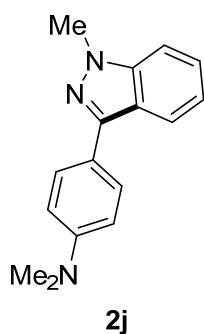

Following general procedure, the crude product was purified by flash column chromatography (5:1 petroleum ether: ethyl acetate) to afford **2j** (42.0 mg, 67% yield) as slight yellow solid. m.p. 80-81 °C. Reaction time: 24h. <sup>1</sup>H NMR (400 MHz, CDCl<sub>3</sub>): δ = 7.92 (d, *J* = 8.0 Hz, 1H), 7.76 (d, *J* = 8.4 Hz, 2H), 7.31-7.28 (m, 2H), 7.10-7.07 (m, *J* = 8.8 Hz, 1H), 6.77 (d, *J* = 8.8 Hz, 2H), 4.00 (s, 3H), 2.93 (s, 6H) ppm; <sup>13</sup>C NMR (100 MHz, CDCl<sub>3</sub>): δ 150.3, 144.3, 141.4, 128.2, 126.1, 122.0, 121.7, 121.6, 120.3, 112.7, 109.0, 40.6, 35.4 ppm. HRMS (ESI) *m/z* calcd for C<sub>16</sub>H<sub>18</sub>N<sub>3</sub> [M+H]<sup>+</sup>: 252.1495, found: 252.1498.

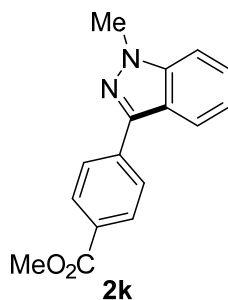

Following general procedure, the crude product was purified by flash column chromatography (20:1 petroleum ether: ethyl acetate) to afford **2k** (31.1 mg, 59% yield) as slight yellow solid. m.p. 125-126 °C. Reaction time: 24h. <sup>1</sup>H NMR (400 MHz, CDCl<sub>3</sub>): δ = 8.16 (d, *J* = 6.8 Hz, 2H), 8.05 (d, *J* = 7.2 Hz, 2H), 8.01 (d, *J* = 8.0 Hz, 1H), 7.43-7.42 (m, 2H), 7.26-7.22 (m, 1H), 4.13 (s, 3H), 3.94 (s, 3H) ppm; <sup>13</sup>C NMR (100 MHz, CDCl<sub>3</sub>): δ 167.0, 142.4, 141.5, 138.2, 130.1, 129.1, 127.0, 126.5, 121.7, 121.5, 121.1, 109.5, 52.2, 35.7 ppm. HRMS (ESI) *m/z* calcd for C<sub>16</sub>H<sub>15</sub>N<sub>2</sub>O<sub>2</sub> [M+H]<sup>+</sup>: 267.1128, found: 267.1124.



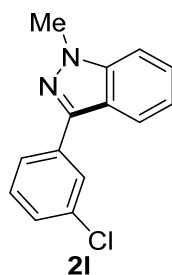

Following general procedure, the crude product was purified by flash column chromatography (20:1 petroleum ether: ethyl acetate) to afford **2l** (40.7 mg, 84% yield) as colourless oil. Reaction time: 24h.  $^1\text{H}$  NMR (400 MHz,  $\text{CDCl}_3$ ):  $\delta$  = 7.89-7.87 (m, 2H), 7.75 (dt,  $J$  = 1.6, 7.6 Hz, 1H), 7.34-7.30 (m, 4H), 7.15-7.11 (m, 1H), 4.01 (s, 3H) ppm;  $^{13}\text{C}$  NMR (100 MHz,  $\text{CDCl}_3$ ):  $\delta$  141.1, 140.4, 134.5, 133.7, 129.0, 126.7, 126.2, 125.4, 124.3, 120.4, 120.2, 120.0, 108.3, 34.6 ppm. HRMS (ESI)  $m/z$  calcd for  $\text{C}_{14}\text{H}_{12}\text{ClN}_2$   $[\text{M}+\text{H}]^+$ : 243.0684, found: 243.0683.

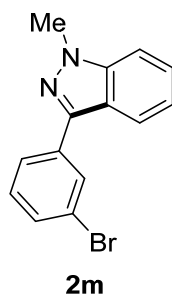

Following general procedure, the crude product was purified by flash column chromatography (20:1 petroleum ether: ethyl acetate) to afford **2m** (45.4 mg, 80% yield) as white solid. m.p. 71-72 °C. Reaction time: 24h.  $^1\text{H}$  NMR (400 MHz,  $\text{CDCl}_3$ ):  $\delta$  = 8.12 (t,  $J$  = 1.6 Hz, 1H), 7.97 (d,  $J$  = 8.0 Hz, 1H), 7.89 (dt,  $J$  = 1.2 Hz, 7.6 Hz, 1H), 7.52-7.49 (m, 1H), 7.43-7.42 (m, 2H), 7.35 (t,  $J$  = 8.0 Hz, 1H), 7.24-7.21 (m, 1H), 4.11 (s, 3H) ppm;  $^{13}\text{C}$  NMR (100 MHz,  $\text{CDCl}_3$ ):  $\delta$  142.1, 141.5, 135.8, 130.7, 130.3, 130.2, 126.5, 125.8, 123.0, 121.5, 121.3, 121.0, 109.4, 35.7 ppm. HRMS (ESI)  $m/z$  calcd for  $\text{C}_{14}\text{H}_{12}\text{BrN}_2$   $[\text{M}+\text{H}]^+$ : 287.0179, found: 287.0177.

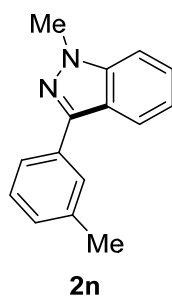

Following general procedure, the crude product was purified by flash column chromatography (20:1 petroleum ether: ethyl acetate) to afford **2n** (27.5 mg, 63% yield) as slight yellow oil. Reaction time: 24h.  $^1\text{H}$  NMR (400 MHz,  $\text{CDCl}_3$ ):  $\delta$  = 8.01 (d,  $J$  = 8.0 Hz, 1H), 7.78 (s, 1H), 7.75 (d,  $J$  = 7.2 Hz, 2H), 7.41-7.37 (m, 3H), 7.22-7.19 (m, 2H), 4.11 (s, 3H), 2.45 (s, 3H) ppm;  $^{13}\text{C}$  NMR (100 MHz,  $\text{CDCl}_3$ ):  $\delta$

143.9, 141.5, 138.5, 128.7(2C), 128.0, 126.3, 124.6, 121.7, 121.5, 120.9, 109.2, 35.5, 21.6 ppm. HRMS (ESI)  $m/z$  calcd for  $C_{15}H_{15}N_2$   $[M+H]^+$ : 223.1230, found: 223.1230.

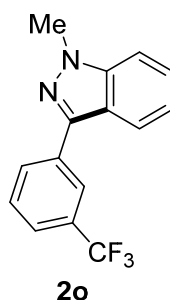

Following general procedure, the crude product was purified by flash column chromatography (20:1 petroleum ether: ethyl acetate) to afford **2o** (36.0 mg, 65% yield) as slight yellow oil. Reaction time: 24h.  $^1H$  NMR (400 MHz,  $CDCl_3$ ):  $\delta$  = 8.24 (s, 1H), 8.15-8.13 (m, 1H), 7.99-7.97 (m, 1H), 7.64-7.58 (m, 2H), 7.45-7.43 (m, 2H), 7.27-7.23 (m, 1H), 4.13 (s, 3H);  $^{13}C$  NMR (100 MHz,  $CDCl_3$ ):  $\delta$  142.1, 141.5, 134.6, 131.3 (q,  $J$  = 31.0 Hz), 130.4, 129.3, 126.5, 124.3 (q,  $J$  = 3.4 Hz), 124.2 (q,  $J$  = 270.9 Hz), 124.0 (q,  $J$  = 3.7 Hz), 121.5, 121.4, 120.9, 109.5, 35.7 ppm. HRMS (ESI)  $m/z$  calcd for  $C_{15}H_{12}F_3N_2$   $[M+H]^+$ : 277.0947, found: 277.0945.

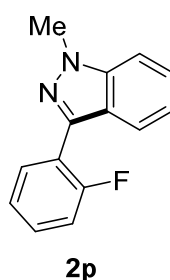

Following general procedure, the crude product was purified by flash column chromatography (10:1 petroleum ether: ethyl acetate) to afford **2p** (15.0 mg, 26% yield) as slight yellow solid. m.p. 70-71 °C. Reaction time: 24h.  $^1H$  NMR (400 MHz,  $CDCl_3$ ):  $\delta$  = 7.78-7.75 (m, 1H), 7.72 (dt,  $J$  = 1.6, 7.2 Hz, 1H), 7.36-7.34 (m, 2H), 7.33-7.31 (m, 1H), 7.21-7.11 (m, 3H), 4.07 (s, 3H) ppm;  $^{13}C$  NMR (100 MHz,  $CDCl_3$ ):  $\delta$  159.0 (d,  $J$  = 247.4 Hz), 140.0, 138.4, 130.0 (d,  $J$  = 3.4 Hz), 128.7 (d,  $J$  = 8.1 Hz), 125.4, 123.4 (d,  $J$  = 4.0 Hz), 121.6, 120.8 (d,  $J$  = 7.5 Hz), 120.2 (d,  $J$  = 4.6 Hz), 119.8, 115.1 (d,  $J$  = 22.3 Hz), 108.0, 34.6 ppm. HRMS (ESI)  $m/z$  calcd for  $C_{14}H_{12}FN_2$   $[M+H]^+$ : 227.0979, found: 227.0979.

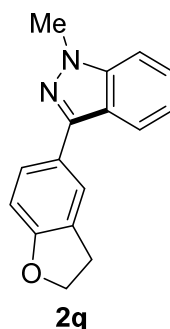

Following general procedure, the crude product was purified by flash column

chromatography (20:1 petroleum ether: ethyl acetate) to afford **2q** (22.0 mg, 44% yield) as slight yellow solid. m.p. 71-72 °C. Reaction time: 24h. <sup>1</sup>H NMR (400 MHz, CDCl<sub>3</sub>): δ = 7.96 (d, *J* = 8.0 Hz, 1H), 7.78 (s, 1H), 7.71-7.9 (m, 1H), 7.40-7.39 (m, 2H), 7.20-7.18 (m, 1H), 6.91 (d, *J* = 8.0 Hz, 1H), 4.62 (t, *J* = 8.8 Hz, 2H), 4.01 (s, 3H), 3.29 (t, *J* = 8.8 Hz, 2H) ppm; <sup>13</sup>C NMR (100 MHz, CDCl<sub>3</sub>): δ 160.1, 144.1, 141.4, 127.8, 127.5, 126.2, 124.1, 121.5, 121.4, 120.6, 109.5, 109.1, 71.5, 35.5, 29.7 ppm. HRMS (ESI) *m/z* calcd for C<sub>16</sub>H<sub>15</sub>N<sub>2</sub>O [M+H]<sup>+</sup>: 251.1179, found: 251.1179.

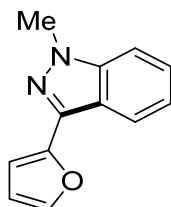

**2r**

Following general procedure, the crude product was purified by flash column chromatography (15:1 petroleum ether: ethyl acetate) to afford **2r** (36.0 mg, 91% yield) as slight yellow oil. Reaction time: 24h. <sup>1</sup>H NMR (400 MHz, CDCl<sub>3</sub>): δ = 8.06 (dt, *J* = 1.2, 8.4 Hz, 1H), 7.57 (dd, *J* = 0.8, 2.0 Hz, 1H), 7.44-7.36 (m, 2H), 7.24-7.20 (m, 1H), 6.89 (dd, *J* = 0.8, 3.2 Hz, 1H), 6.55 (dd, *J* = 2.0, 3.2 Hz, 1H), 4.09 (s, 3H) ppm; <sup>13</sup>C NMR (100 MHz, CDCl<sub>3</sub>): δ 148.9, 142.1, 140.9, 136.0, 126.7, 121.6, 121.2, 120.9, 111.4, 109.1, 106.6, 35.7 ppm. HRMS (ESI) *m/z* calcd for C<sub>12</sub>H<sub>11</sub>N<sub>2</sub>O [M+H]<sup>+</sup>: 199.0866, found: 199.0867.

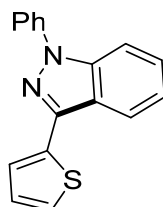

**2s**

Following general procedure, the crude product was purified by flash column chromatography (20:1 petroleum ether: ethyl acetate) to afford **2s** (24.8 mg, 45% yield) as slight yellow solid. m.p. 88-89 °C. Reaction time: 24h. <sup>1</sup>H NMR (400 MHz, CDCl<sub>3</sub>): δ = 8.09 (d, *J* = 8.0 Hz, 1H), 7.78-7.72 (m, 4H), 7.53 (t, *J* = 8.0 Hz, 2H), 7.44 (t, *J* = 7.6 Hz, 1H), 7.40-7.36 (m, 2H), 7.29 (t, *J* = 7.2 Hz, 1H), 7.20-7.18 (m, 1H) ppm; <sup>13</sup>C NMR (100 MHz, CDCl<sub>3</sub>): δ 141.1, 140.2, 140.0, 135.5, 129.5, 127.7, 127.4, 126.8, 125.5, 125.2, 123.1, 122.6, 122.2, 121.4, 110.8 ppm. HRMS (ESI) *m/z* calcd for C<sub>17</sub>H<sub>12</sub>N<sub>2</sub>S [M+H]<sup>+</sup>: 277.0794, found: 277.0795.

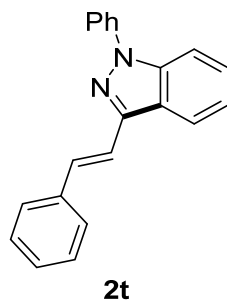

Following general procedure, the crude product was purified by flash column chromatography (20:1 petroleum ether: ethyl acetate) to afford **2t** (47.5 mg, 80% yield) as slight yellow oil. Reaction time: 24h.  $^1\text{H}$  NMR (400 MHz,  $\text{CDCl}_3$ ):  $\delta$  = 8.06 (d,  $J$  = 8.0 Hz, 1H), 7.76-7.72 (m, 3H), 7.63-7.59 (m, 3H), 7.54-7.51 (m, 3H), 7.45-7.35 (m, 4H), 7.30-7.26 (m, 2H) ppm;  $^{13}\text{C}$  NMR (100 MHz,  $\text{CDCl}_3$ ): 144.3, 140.2, 140.0, 137.3, 131.7, 129.5, 128.8, 128.0, 127.3, 126.8, 126.7, 123.5, 123.0, 122.0, 121.2, 119.7, 110.8  $\delta$ ppm. HRMS (ESI)  $m/z$  calcd for  $\text{C}_{21}\text{H}_{17}\text{N}_2$   $[\text{M}+\text{H}]^+$ : 297.1386, found: 297.1388.

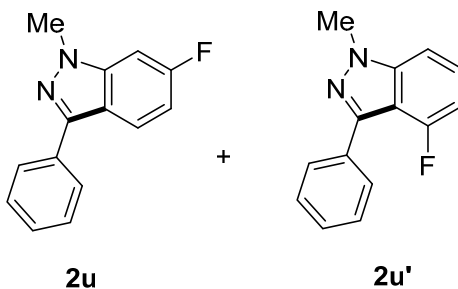

Following general procedure, the crude product was purified by flash column chromatography (20:1 petroleum ether: ethyl acetate) to afford **2u** and **2u'** (**2u**: **2u'** = 5:1, 40.0 mg, 89% yield) as slight yellow oil. Reaction time: 24h. Mixed spectrum:  $^1\text{H}$  NMR (400 MHz,  $\text{CDCl}_3$ ):  $\delta$  = 7.94-7.91 (m, 2.22H), 7.48-7.45 (m, 2H), 7.40-7.36 (m, 1H), 7.33-7.28 (m, 0.89H), 7.13 (d,  $J$  = 8.8 Hz, 0.85H), 7.00 (dd,  $J$  = 2.4, 8.8 Hz, 0.20H), 6.95 (dd,  $J$  = 2.0, 8.8 Hz, 0.21H), 6.83-6.78 (m, 0.84H), 4.07 (s, 2.53H), 4.03 (s, 0.54H) ppm;  $^{13}\text{C}$  NMR (100 MHz,  $\text{CDCl}_3$ ):  $\delta$  162.2 (d,  $J$  = 243.6 Hz), 156.2 (d,  $J$  = 251.5 Hz), 144.2 (d,  $J$  = 8.9 Hz), 144.1, 142.9 (d,  $J$  = 4.0 Hz), 141.8 (d,  $J$  = 12.1 Hz), 133.2, 133.0, 128.9, 128.6 (d,  $J$  = 4.9 Hz), 128.4, 128.1, 128.0, 127.4 (d,  $J$  = 2.7 Hz), 127.3, 122.8 (d,  $J$  = 10.9 Hz), 118.6, 111.4 (d,  $J$  = 20.5 Hz), 110.8 (d,  $J$  = 26.9 Hz), 105.5 (d,  $J$  = 20.6 Hz), 105.2 (d,  $J$  = 3.9 Hz), 94.8 (d,  $J$  = 26.4 Hz), 35.9, 35.6 ppm. HRMS (ESI)  $m/z$  calcd for  $\text{C}_{15}\text{H}_{12}\text{FN}_2$   $[\text{M}+\text{H}]^+$ : 227.0979, found: 227.0980.

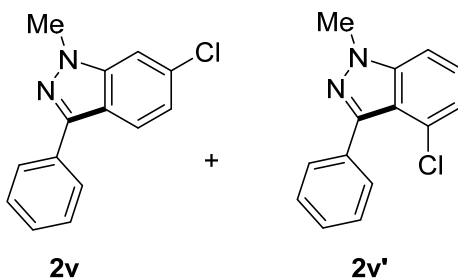

Following general procedure, the crude product was purified by flash column chromatography (20:1 petroleum ether: ethyl acetate) to afford **2v** and **2v'** (**2v**: **2v'**=3:1, 30.0 mg, 68% yield) as slight yellow oil. Reaction time: 24h. Mixed spectrum: <sup>1</sup>H NMR (400 MHz, CDCl<sub>3</sub>): δ = 8.02-8.00 (m, 0.25H), 7.97-7.94 (m, 0.48H), 7.91-7.90 (m, 0.73H), 7.89-7.87 (m, 1.48H), 7.51-7.47 (m, 2H), 7.41-7.37 (m, 2H), 7.22-7.18 (m, 0.23H), 7.14 (dd, *J* = 2.0, 8.4 Hz, 0.71H), 4.11(s, 0.71H), 4.05 (s, 2.23H) ppm; <sup>13</sup>C NMR (100 MHz, CDCl<sub>3</sub>): δ 144.0, 143.7, 141.9, 141.5, 133.7, 133.1, 132.8, 128.9, 128.8, 128.2, 127.8, 127.4, 127.3, 126.3, 122.4, 122.0, 121.6, 121.4, 120.9, 120.2, 109.2, 109.0, 35.7, 35.6 ppm. HRMS (ESI) *m/z* calcd for C<sub>14</sub>H<sub>12</sub>ClN<sub>2</sub> [M+H]<sup>+</sup>: 243.0684, found: 243.0684.

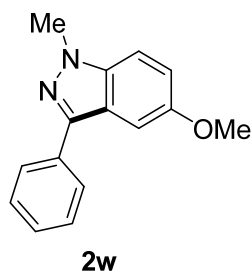

Following general procedure, the crude product was purified by flash column chromatography (15:1 petroleum ether: ethyl acetate) to afford **2w** (35.7 mg, 75% yield) as slight yellow solid. m.p. 62-63 °C. Reaction time: 24h. <sup>1</sup>H NMR (400 MHz, CDCl<sub>3</sub>): δ = 7.92-7.90 (m, 2H), 7.51-7.48 (m, 2H), 7.39-7.35 (m, 1H), 7.32-7.28 (m, 2H), 7.09 (dd, *J* = 2.0, 8.8 Hz, 1H), 4.07 (s, 3H), 3.86 (s, 3H) ppm; <sup>13</sup>C NMR (100 MHz, CDCl<sub>3</sub>): δ 155.1, 142.9, 137.5, 134.0, 128.9, 127.6, 127.2, 121.7, 118.5, 110.3, 100.5, 55.9, 35.7 ppm. HRMS (ESI) *m/z* calcd for C<sub>15</sub>H<sub>15</sub>N<sub>2</sub>O [M+H]<sup>+</sup>: 239.1179, found: 239.1181.

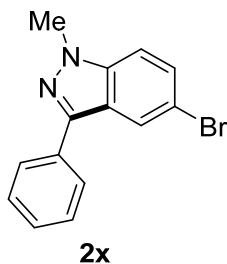

Following general procedure, the crude product was purified by flash column chromatography (20:1 petroleum ether: ethyl acetate) to afford **2x** (40.0 mg, 70% yield) as white solid. m.p. 106-107 °C. Reaction time: 24h. <sup>1</sup>H NMR (400 MHz, CDCl<sub>3</sub>): δ = 8.12 (s, 1H), 7.88 (d, *J* = 7.2 Hz, 2H), 7.51-7.45 (m, 3H), 7.40-7.39 (m, 1H), 7.25 (d, *J* = 8.8 Hz, 1H), 4.07 (s, 3H) ppm; <sup>13</sup>C NMR (100 MHz, CDCl<sub>3</sub>): δ 143.2, 140.1, 133.0, 129.4, 128.9, 128.2, 127.3, 123.8, 123.1, 114.2, 110.7, 35.8 ppm. HRMS (ESI) *m/z* calcd for C<sub>14</sub>H<sub>12</sub>BrN<sub>2</sub> [M+H]<sup>+</sup>: 287.0179, found: 287.0179.

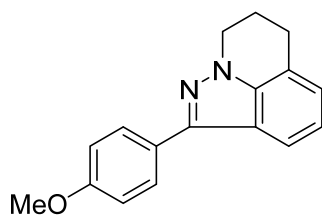

**4a**

Following general procedure, the crude product was purified by flash column chromatography (15:1 petroleum ether: ethyl acetate) to afford **4a** (24.4 mg, 46% yield) as white solid. m.p. 113-114 °C. Reaction time: 24h. <sup>1</sup>H NMR (400 MHz, CDCl<sub>3</sub>): δ = 7.94 (d, *J* = 8.8 Hz, 2H), 7.78 (d, *J* = 7.2 Hz, 1H), 7.12-7.07 (m, 2H), 7.02 (d, *J* = 8.8 Hz, 2H), 4.44 (t, *J* = 6.4 Hz, 2H), 3.03 (t, *J* = 6.4 Hz, 2H), 2.37-2.34 (m, 2H) ppm; <sup>13</sup>C NMR (100 MHz, CDCl<sub>3</sub>): δ 159.3, 143.0, 139.6, 128.1, 127.0, 122.2, 122.0, 121.5, 118.9, 118.8, 114.3, 55.4, 46.3, 24.3, 23.1 ppm. HRMS (ESI) *m/z* calcd for C<sub>17</sub>H<sub>17</sub>N<sub>2</sub>O [M+H]<sup>+</sup>: 265.1336 found: 265.1336.

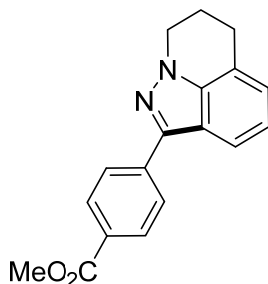

**4b**

Following general procedure, the crude product was purified by flash column chromatography (15:1 petroleum ether: ethyl acetate) to afford **4b** (26.0 mg, 45% yield) as yellow solid. m.p. 156-157 °C. Reaction time: 24h. <sup>1</sup>H NMR (400 MHz, CDCl<sub>3</sub>): δ = 8.16-8.09 (m, 4H), 7.84-7.82 (m, 1H), 7.18-7.14 (m, 1H), 7.12-7.10 (m, 1H), 4.47 (t, *J* = 6.0 Hz, 2H), 3.94 (s, 3H), 3.05 (t, *J* = 6.4 Hz, 2H), 2.37-2.34 (m, 2H) ppm; <sup>13</sup>C NMR (100 MHz, CDCl<sub>3</sub>): δ 167.0, 141.9, 139.7, 138.8, 130.1, 128.8, 126.5, 122.5, 122.4, 122.3, 119.3, 118.6, 52.1, 46.6, 24.2, 23.0 ppm. HRMS (ESI) *m/z* calcd for C<sub>14</sub>H<sub>13</sub>N<sub>2</sub> [M+H]<sup>+</sup>: 293.1285, found: 293.1286.

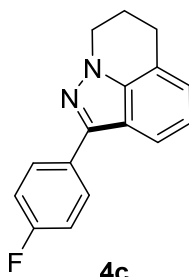

**4c**

Following general procedure, the crude product was purified by flash column chromatography (20:1 petroleum ether: ethyl acetate) to afford **4c** (30.1 mg, 60% yield) as slight yellow oil. Reaction time: 24h. <sup>1</sup>H NMR (400 MHz, CDCl<sub>3</sub>): δ = 7.90-7.87 (m, 2H), 7.66 (d, *J* = 8.0 Hz, 1H), 7.10-7.06 (m, 2H), 7.03-6.99 (m, 2H), 4.36 (t, *J* = 6.0 Hz, 2H), 2.94 (t, *J* = 6.4 Hz, 2H), 2.28-2.24 (m, 2H) ppm; <sup>13</sup>C NMR (100 MHz, CDCl<sub>3</sub>): δ 162.5 (d, *J* = 246.3 Hz), 142.2, 139.6, 130.4 (d, *J* = 3.8 Hz),

128.5 (d,  $J = 7.8$  Hz), 122.2, 122.1 (d,  $J = 43.4$  Hz), 118.9, 118.5, 115.9, 115.6, 46.4, 24.2, 23.0 ppm. HRMS (ESI)  $m/z$  calcd for  $C_{14}H_{13}N_2$   $[M+H]^+$ : 253.1136, found: 253.1137.

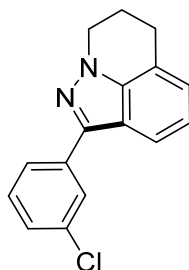

**4d**

Following general procedure, the crude product was purified by flash column chromatography (20:1 petroleum ether: ethyl acetate) to afford **4d** (36.6 mg, 68% yield) as slight yellow solid. m.p. 96-97 °C. Reaction time: 24h.  $^1H$  NMR (400 MHz,  $CDCl_3$ ):  $\delta = 8.01$  (t,  $J = 1.6$  Hz, 1H), 7.90-7.88 (m, 1H), 7.77 (d,  $J = 8.0$  Hz, 1H), 7.39 (t,  $J = 7.6$  Hz, 1H), 7.32-7.30 (m, 1H), 7.15-7.07 (m, 2H), 4.44 (t,  $J = 6.0$  Hz, 2H), 3.02 (t,  $J = 6.4$  Hz, 2H), 2.37-2.31 (m, 2H) ppm;  $^{13}C$  NMR (100 MHz,  $CDCl_3$ ):  $\delta$  141.6, 139.6, 136.1, 134.7, 130.0, 127.5, 126.8, 124.9, 122.5, 122.3, 122.2, 119.0, 118.4, 46.5, 24.2, 23.0 ppm. HRMS (ESI)  $m/z$  calcd for  $C_{14}H_{13}N_2$   $[M+H]^+$ : 269.0840, found: 269.0840.

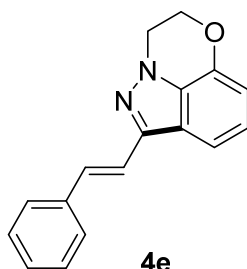

**4e**

Following general procedure, the crude product was purified by flash column chromatography (8:1 petroleum ether: ethyl acetate) to afford **4e** (43.0 mg, 80% yield) as white solid. m.p. 82-83 °C. Reaction time: 24h.  $^1H$  NMR (400 MHz,  $CDCl_3$ ):  $\delta = 7.56$  (d,  $J = 7.6$  Hz, 2H), 7.53 (d,  $J = 8.8$  Hz, 1H), 7.44 (s, 2H), 7.37 (t,  $J = 7.2$  Hz, 2H), 7.27 (t,  $J = 7.6$  Hz, 1H), 7.08 (t,  $J = 8.0$  Hz, 1H), 6.77 (d,  $J = 7.2$  Hz, 1H), 4.58 (t,  $J = 4.4$  Hz, 2H), 4.56 (t,  $J = 4.8$  Hz, 2H);  $^{13}C$  NMR (100 MHz,  $CDCl_3$ ):  $\delta$  143.8, 142.8, 137.3, 131.9, 131.1, 128.8, 127.9, 126.5, 123.0, 121.3, 120.8, 113.8, 108.3, 66.3, 46.1 ppm. HRMS (ESI)  $m/z$  calcd for  $C_{14}H_{13}N_2$   $[M+H]^+$ : 263.1179, found: 263.1180.

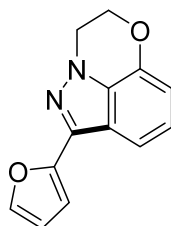

**4f**

Following general procedure, the crude product was purified by flash column chromatography (8:1 petroleum ether: ethyl acetate) to afford **4f** (35.0 mg, 77% yield)

as white solid. m.p. 129-130 °C. Reaction time: 24h.  $^1\text{H}$  NMR (400 MHz,  $\text{CDCl}_3$ ):  $\delta$  = 7.56 (d,  $J$  = 1.6 Hz, 1H), 7.53 (d,  $J$  = 8.4 Hz, 1H), 7.08 (t,  $J$  = 8.0 Hz, 1H), 6.88 (d,  $J$  = 3.6 Hz, 1H), 6.77 (d,  $J$  = 7.2 Hz, 1H), 6.55 (m, 1H), 4.62 (t,  $J$  = 4.4 Hz, 2H), 4.51 (t,  $J$  = 4.8 Hz, 2H);  $^{13}\text{C}$  NMR (100 MHz,  $\text{CDCl}_3$ ):  $\delta$  148.9, 142.7, 142.3, 137.0, 131.6, 123.1, 120.3, 113.8, 111.5, 108.3, 106.9, 66.3, 46.2 ppm. HRMS (ESI)  $m/z$  calcd for  $\text{C}_{14}\text{H}_{13}\text{N}_2$   $[\text{M}+\text{H}]^+$ : 227.0815, found: 227.0814.

#### 4. X-ray structure of 4f (CCDC 1499990)

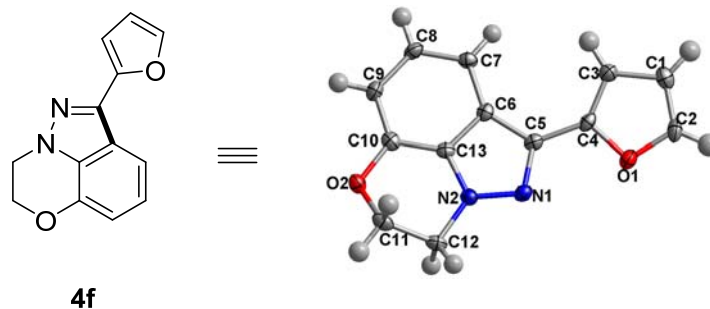

Bond lengths (Å) and angles (deg):

|    |      |        |     |       |        |
|----|------|--------|-----|-------|--------|
| O1 | -C2  | 1.3753 | C7  | -C8   | 1.3777 |
| O1 | -C4  | 1.3807 | C8  | -C9   | 1.4275 |
| O2 | -C10 | 1.3823 | C9  | -C10  | 1.3652 |
| O2 | -C11 | 1.4602 | C10 | -C13  | 1.3969 |
| N1 | -N2  | 1.3592 | C11 | -C12  | 1.5252 |
| N1 | -C5  | 1.3465 | C1  | -H1   | 0.9300 |
| N2 | -C12 | 1.4525 | C2  | -H2   | 0.9300 |
| N2 | -C13 | 1.3495 | C3  | -H3   | 0.9300 |
| C1 | -C2  | 1.3377 | C7  | -H7   | 0.9300 |
| C1 | -C3  | 1.4250 | C8  | -H8   | 0.9300 |
| C3 | -C4  | 1.3507 | C9  | -H9   | 0.9300 |
| C4 | -C5  | 1.4485 | C11 | -H11A | 0.9700 |
| C5 | -C6  | 1.4431 | C11 | -H11B | 0.9700 |



|     |      |      |        |      |       |       |        |
|-----|------|------|--------|------|-------|-------|--------|
| C6  | -C7  |      | 1.4152 | C12  | -H12A |       | 0.9700 |
| C6  | -C13 |      | 1.3946 | C12  | -H12B |       | 0.9700 |
| C2  | -O1  | -C4  | 105.44 | N2   | -C13  | -C6   | 109.23 |
| C10 | -O2  | -C11 | 111.87 | N2   | -C13  | -C10  | 125.14 |
| N2  | -N1  | -C5  | 105.44 | C6   | -C13  | -C10  | 125.60 |
| N1  | -N2  | -C12 | 128.68 | C2   | -C1   | -H1   | 127.00 |
| N1  | -N2  | -C13 | 111.45 | C3   | -C1   | -H1   | 127.00 |
| C12 | -N2  | -C13 | 119.87 | O1   | -C2   | -H2   | 124.00 |
| C2  | -C1  | -C3  | 106.09 | C1   | -C2   | -H2   | 124.00 |
| O1  | -C2  | -C1  | 111.42 | C1   | -C3   | -H3   | 126.00 |
| C1  | -C3  | -C4  | 107.10 | C4   | -C3   | -H3   | 126.00 |
| O1  | -C4  | -C3  | 109.94 | C6   | -C7   | -H7   | 121.00 |
| O1  | -C4  | -C5  | 117.10 | C8   | -C7   | -H7   | 121.00 |
| C3  | -C4  | -C5  | 132.93 | C7   | -C8   | -H8   | 118.00 |
| N1  | -C5  | -C4  | 121.52 | C9   | -C8   | -H8   | 118.00 |
| N1  | -C5  | -C6  | 111.49 | C8   | -C9   | -H9   | 120.00 |
| C4  | -C5  | -C6  | 126.94 | C10  | -C9   | -H9   | 120.00 |
| C5  | -C6  | -C7  | 140.47 | O2   | -C11  | -H11A | 109.00 |
| C5  | -C6  | -C13 | 102.38 | O2   | -C11  | -H11B | 109.00 |
| C7  | -C6  | -C13 | 117.14 | C12  | -C11  | -H11A | 109.00 |
| C6  | -C7  | -C8  | 117.89 | C12  | -C11  | -H11B | 109.00 |
| C7  | -C8  | -C9  | 123.14 | H11A | -C11  | -H11B | 108.00 |

|    |      |      |        |      |      |       |        |
|----|------|------|--------|------|------|-------|--------|
| C8 | -C9  | -C10 | 119.64 | N2   | -C12 | -H12A | 110.00 |
| O2 | -C10 | -C9  | 125.70 | N2   | -C12 | -H12B | 110.00 |
| O2 | -C10 | -C13 | 117.72 | C11  | -C12 | -H12A | 110.00 |
| C9 | -C10 | -C13 | 116.57 | C11  | -C12 | -H12B | 110.00 |
| O2 | -C11 | -C12 | 114.25 | H12A | -C12 | -H12B | 109.00 |
| N2 | -C12 | -C11 | 107.01 |      |      |       |        |

## 5. Optimization of the Reaction Conditions

### 1. Initial optimization of the Ag salts:

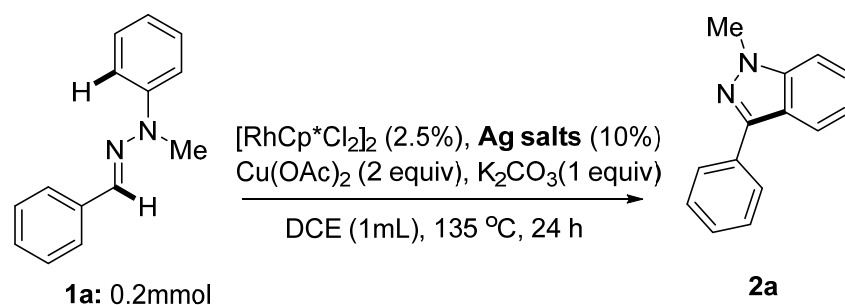

| Entry    | Ag salts           | Yield (%) <sup>a</sup> |
|----------|--------------------|------------------------|
| <b>1</b> | <b>AgOTf</b>       | <b>75</b>              |
| 2        | AgSbF <sub>6</sub> | 59                     |
| 3        | AgBF <sub>4</sub>  | 50                     |
| 4        | AgOAc              | 10                     |
| 5        | -                  | 50                     |

<sup>a</sup> Yields determined by <sup>1</sup>NMR spectroscopy using *N*-(4-methoxyphenyl)acetamide as the internal standard.

### 2. Initial optimization of the solvents:

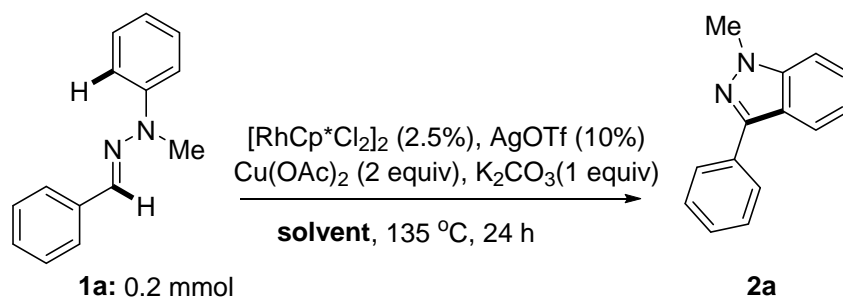

| Entry                                                                                                                                | Solvent             | Yield(%) <sup>a</sup> |
|--------------------------------------------------------------------------------------------------------------------------------------|---------------------|-----------------------|
| 1                                                                                                                                    | DCE (1mL)           | 75                    |
| 2                                                                                                                                    | THF (1ml)           | 11                    |
| 3                                                                                                                                    | 1,4-Dioxane (1ml)   | 22                    |
| <b>4</b>                                                                                                                             | <b>DCE (0.5 mL)</b> | <b>80</b>             |
| <sup>a</sup> Yields determined by <sup>1</sup> NMR spectroscopy using <i>N</i> -(4-methoxyphenyl)acetamide as the internal standard. |                     |                       |

## 6. Deuterium labeling experiment

### 1. Synthesis of deuterated *N*-nitrosoaniline substrate **1j-d<sub>3</sub>**:

**1j-d<sub>3</sub>** was prepared from *p*-tolualdehyde and deuterated hydrazine<sup>1c</sup> according to the general procedure **A**.

### 2. Deuterium labeling experiment

An oven-dried Schlenk tube (10 mL) was equipped with a magnetic stir bar, **1j-d<sub>3</sub>** (0.2 mmol, 45.4 mg),  $[RhCp^*Cl_2]_2$  (0.025 equiv, 0.005 mmol, 3.1 mg), AgOTf (0.10 equiv, 0.02 mmol, 5.1 mg),  $Cu(OAc)_2$  (2.0 equiv, 0.40 mmol, 72 mg),  $K_2CO_3$  (1.0 equiv, 0.20 mmol, 27 mg). The flask was evacuated and backfilled with Argon for 3 times. 0.5 mL DCE was added with syringe under Argon. The resulting solution was stirred at 120°C for 24 h. Then the mixture was concentrated under vacuum to remove DCE, and the residue was subjected to column chromatography on silica gel to afford the product and remaining substrate.

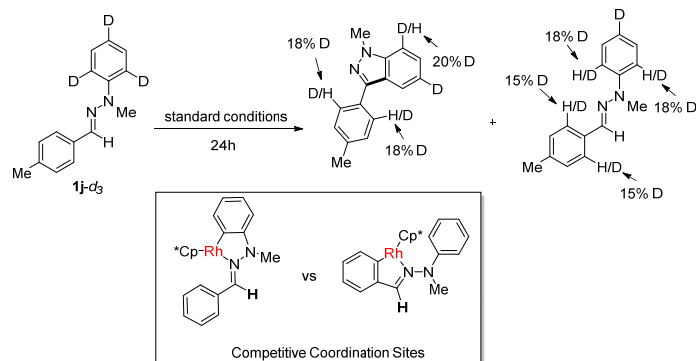

<sup>1</sup>H NMR (400M, CH<sub>3</sub>CN)

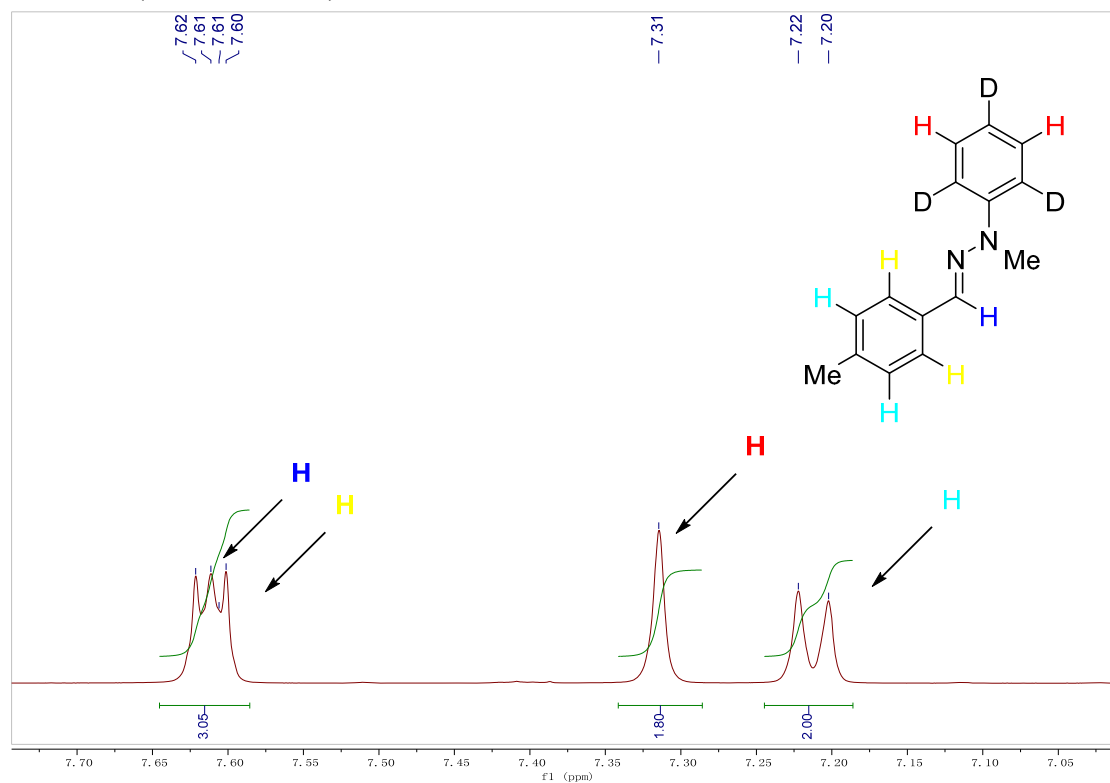

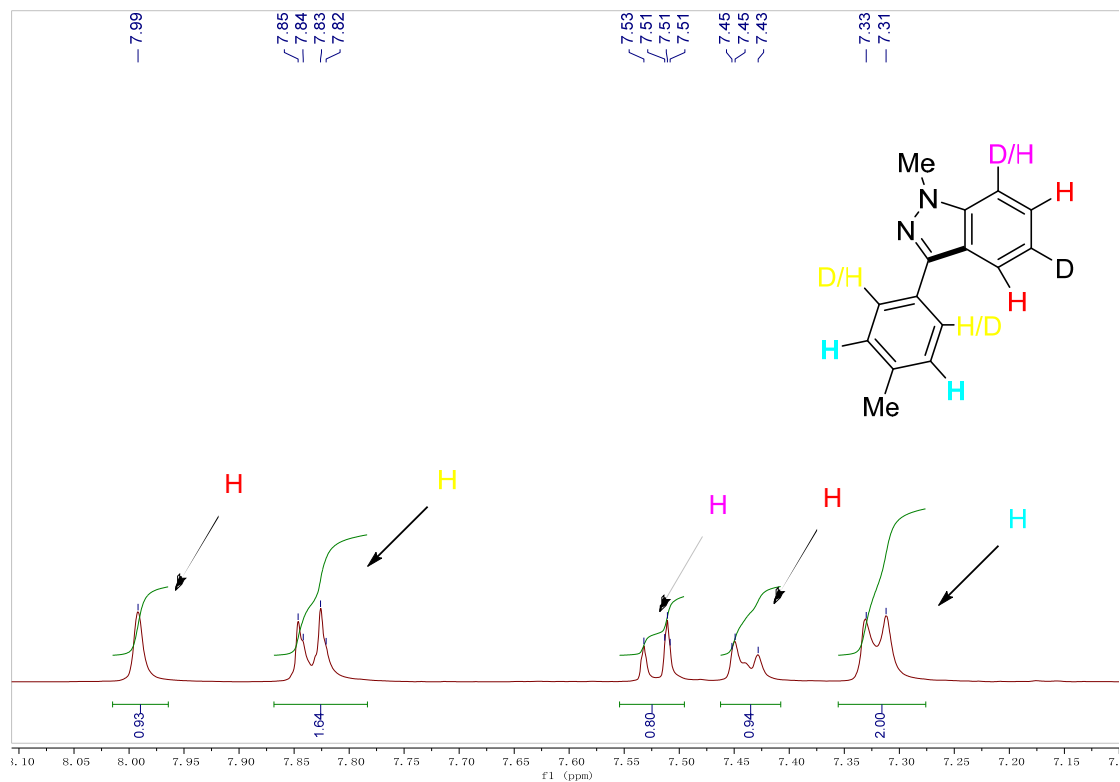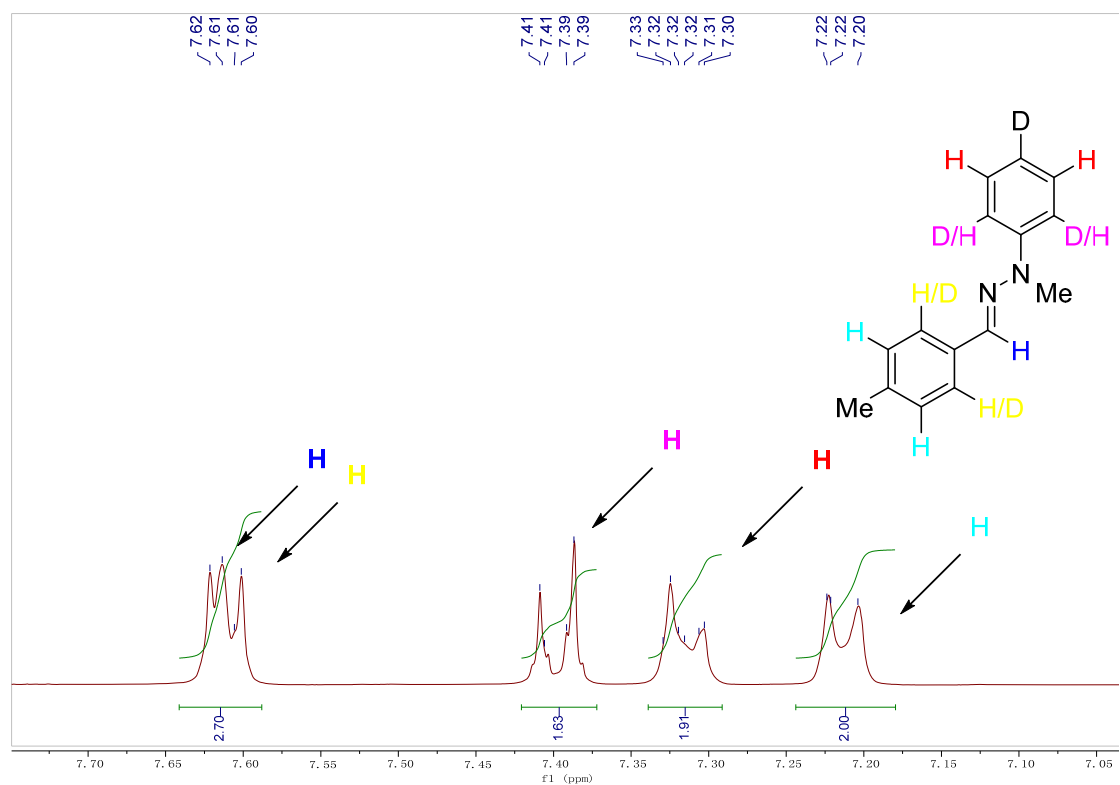

## 7. Computational Details of Mechanistic Studies

### Computational Details

All calculations were performed with the Gaussian 09 package.<sup>3</sup> All of the geometries were optimized by the M06-2X functional<sup>4</sup> with the basis set BS1. In BS1, for Rh atom, the effective core potential (ECP)<sup>5</sup> was employed for Rh, and the basis set for Rh is a modified LANL2DZ plus a set of f-type functions,<sup>6</sup> in which the two 5p and 6p functions of the standard LANL2DZ are replaced by the optimized 5p and 6p functions from Couty and Hall,<sup>7</sup> respectively. For other atoms, the 6-31G(d,p) basis set was used. To get more accurate energies, we performed single-point energy calculations for all the species at the M062x/BS2 level. In BS2, we employed the same basis set for Rh atom as in BS1, and the cc-pVTZ basis set for other atoms. The calculated Gibbs free energies refer to 298.15 K and 1 atm. For each transition state, the intrinsic reaction coordinate (IRC)<sup>8</sup> analysis was performed to verify whether the transition state truly connects the reactant and the product. The solvent effect was treated with the polarizable continuum model (PCM).<sup>9</sup> In calculating the free energies for species in the 1,2-dichloroethane solvent, we have used the method developed by Whitesides *et al.*<sup>10</sup> to calculate the entropic contributions. This method was designed to better describe the suppression of the translational entropy upon moving from gas phase to a solvent for each species.<sup>11</sup>

Activation free energy barriers here are defined as the free energy difference between the transition state and the lowest-energy stationary point before it in the reaction pathways.

#### 1. The alternative pathway for C=N double insertion (path 2)

Direct formation of intermediate **IV** from **II** via C=N insertion reaction is

<sup>3</sup> M. J. Frisch, G. W. Trucks, H. B. Schlegel, G. E. Scuseria, M. A. Robb, J. R. Cheeseman, G. Scalmani, V. Barone, B. Mennucci, G. A. Petersson, H. Nakatsuji, M. Caricato, X. Li, H. P. Hratchian, A. F. Izmaylov, J. Bloino, G. Zheng, J. L. Sonnenberg, M. Hada, M. Ehara, K. Toyota, R. Fukuda, J. Hasegawa, M. Ishida, T. Nakajima, Y. Honda, O. Kitao, H. Nakai, T. Vreven, J. A. Montgomery, Jr., J. E. Peralta, F. Ogliaro, M. Bearpark, J. J. Heyd, E. Brothers, K. N. Kudin, V. N. Staroverov, T. Keith, R. Kobayashi, J. Normand, K. Raghavachari, A. Rendell, J. C. Burant, S. S. Iyengar, J. Tomasi, M. Cossi, N. Rega, J. M. Millam, M. Klene, J. E. Knox, J. B. Cross, V. Bakken, C. Adamo, J. Jaramillo, R. Gomperts, R. E. Stratmann, O. Yazyev, A. J. Austin, R. Cammi, C. Pomelli, J. W. Ochterski, R. L. Martin, K. Morokuma, V. G. Zakrzewski, G. A. Voth, P. Salvador, J. J. Dannenberg, S. Dapprich, A. D. Daniels, O. Farkas, J. B. Foresman, J. V. Ortiz, J. Cioslowski, and D. J. Fox, Gaussian, Inc., Wallingford CT, 2013.

<sup>4</sup> a) Y. Zhao, N. E. Schultz, D. G. Truhlar, *J. Chem. Theory. Comput.* **2006**, *2*, 364; b) Y. Zhao, D. G. Truhlar, *J. Chem. Phys.* **2006**, *125*, 194101; c) Y. Zhao, D. G. Truhlar, *J. Phys. Chem. A* **2006**, *110*, 13126.

<sup>5</sup> a) P. J. Hay and W. R. Wadt, *J. Chem. Phys.*, 1985, **82**, 299; b) W. R. Wadt and P. J. Hay, *J. Chem. Phys.*, 1985, **82**, 284.

<sup>6</sup> A. W. Ehlers, M. Böhme, S. Dapprich, A. Gobbi, A. Höllwarth, V. Jonas, K. F. Köhler, R. Stegman, A. Veldkamp and G. Frenking, *Chem. Phys. Lett.*, **1993**, *208*, 111.

<sup>7</sup> M. Couty and M. B. Hall, *J. Comput. Chem.*, **1996**, *17*, 1359.

<sup>8</sup> C. Gonzalez, H. B. Schlegel, *J. Chem. Phys.* **1989**, *90*, 2154.

<sup>9</sup> J. Tomasi, M. Persico, *Chem. Rev.* **1994**, *94*, 2027.

<sup>10</sup> M. Mammen, E. I. Shakhnovich, J. M. Deutch, G. M. Whitesides, *J. Org. Chem.* **1998**, *63*, 3821.

<sup>11</sup> a) G. Jindal, R. B. Sunoj, *J. Am. Chem. Soc.* **2014**, *136*, 15998; b) G. Zeng, S. Li, *Inorg. Chem.* **2011**, *50*, 10572.

possible. We have tried our best to locate the transition state of C=N insertion **II** or its rotation isomer (**II'**). However, all attempts failed. We performed a relaxed potential energy scan by fixing the C-C distance at a series of values to estimate the approximate barrier. As shown in Figure S1, the generation of the C=N bond insertion intermediate (**IV**) is endothermic by about 40 kcal mol<sup>-1</sup> in electronic energy (the relative free energy is 48.8 kcal mol<sup>-1</sup> above above the active catalyst **I** and reactant **1a**), which suggests that the path 2 could be excluded.

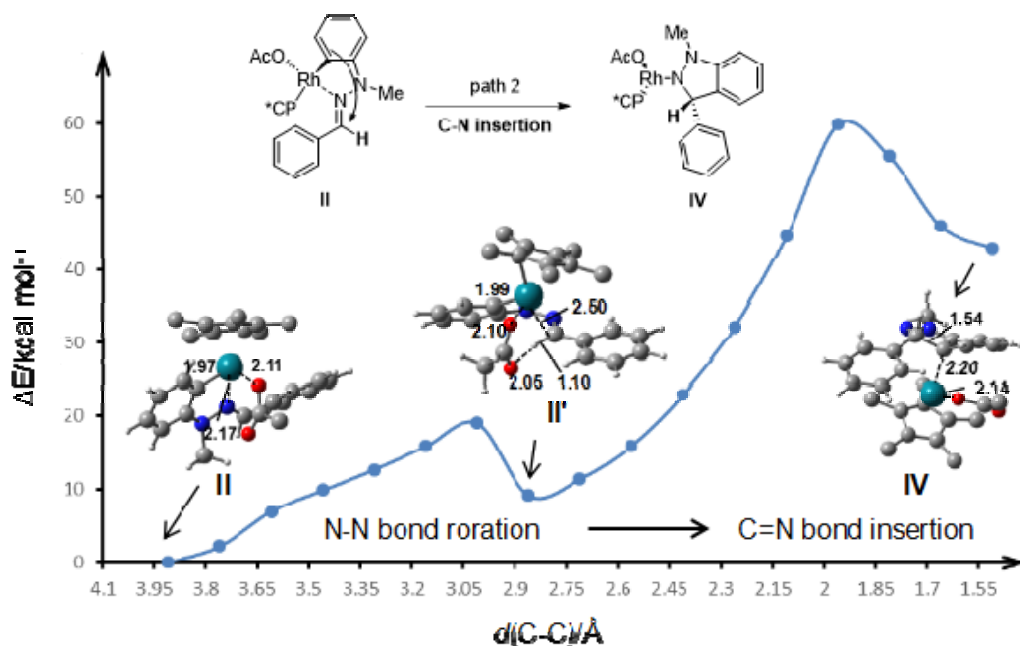

**Figure S1.** The relaxed potential energy scan for the C=N bond insertion step from **II** to **IV**.

2. Computational investigations of the steric effects on the proposed C-H/C-H cross coupling protocol

To investigate the influence of steric effects on this reaction, we calculated the corresponding Gibbs Free Energy Barriers of substrate **1A** and **1B**. The Second C-H bond activation step and reductive elimination step, are shown in Table S2. For substrates **5** and **6**, the corresponding reductive elimination barriers are 37.6 and 38.9 kcal mol<sup>-1</sup>, respectively, which are much higher than that of substrate **1a**. These results can account for the experimental observations that no desired product was observed for substrate **1A** and **1B**.

**Table S1** Comparison of the Gibbs Free Energy Barriers ( $G^\ddagger$ , in kcal/mol) of other substrates.

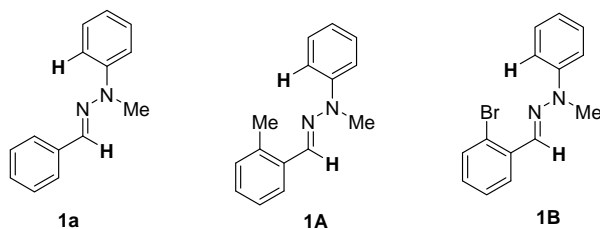

| Substrate | $G^\ddagger_{TS1}$ | $G^\ddagger_{TS3}$ | $G^\ddagger_{TS4}$ | yield      |
|-----------|--------------------|--------------------|--------------------|------------|
| <b>1a</b> | <b>33.2</b>        | <b>26.5</b>        | <b>32.3</b>        | <b>80%</b> |
| <b>1A</b> | 32.7               | 31.7               | <b>37.6</b>        | n.d.       |
| <b>1B</b> | 31.3               | 30.4               | <b>38.9</b>        | n.d.       |

### Cartesian Coordinates and Energies of the Optimized Structures

Table S2. Calculated electronic energies in 1,2-dichloroethane ( $E_{sol}$ , in a.u., at the M06-2X/BS2 level), thermal correction energies ( $E_{therm}$ , in a.u.), corrected translational entropy ( $S_{t-w}$ , in  $\text{cal mol}^{-1}\cdot\text{K}^{-1}$ ), rotational entropy ( $S_r$ , in  $\text{cal mol}^{-1}\cdot\text{K}^{-1}$ ), vibrational entropy ( $S_v$ , in  $\text{cal mol}^{-1}\cdot\text{K}^{-1}$ ), corrected entropy contribution (TSW, in a.u.) and corrected free energies ( $G$ , in a.u.) for all stationary points in Figure 1 and Table S1. TSW stands for the corrected entropy using the Whitesides' method.

| Species     | $E_{sol}$   | $E_{therm}$ | $S_{t-w}$ | $S_r$ | $S_v$ | TSW     | $G$         |
|-------------|-------------|-------------|-----------|-------|-------|---------|-------------|
| <b>1a</b>   | -651.34439  | 0.26407     | 32.2      | 32.9  | 43.0  | 0.05135 | -651.13167  |
| <b>I</b>    | -956.49032  | 0.35310     | 33.1      | 33.3  | 87.7  | 0.07323 | -956.21045  |
| <b>TS1</b>  | -1607.80639 | 0.61481     | 34.8      | 36.3  | 134.6 | 0.09769 | -1607.28926 |
| <b>II</b>   | -1378.74249 | 0.55066     | 34.4      | 35.7  | 120.0 | 0.09035 | -1378.28219 |
| <b>AcOH</b> | -229.09174  | 0.06650     | 28.5      | 23.8  | 2.5   | 0.02605 | -229.05129  |
| <b>TS2</b>  | -1378.71211 | 0.54703     | 34.4      | 35.7  | 119.6 | 0.09013 | -1378.25520 |



|                 |             |         |      |      |       |         |             |
|-----------------|-------------|---------|------|------|-------|---------|-------------|
| <b>II'</b>      | -1378.72246 | 0.54971 | 34.4 | 35.8 | 122.6 | 0.09156 | -1378.26430 |
| <b>TS3</b>      | -1378.70435 | 0.54454 | 34.4 | 35.7 | 116.9 | 0.08889 | -1378.24869 |
| <b>III</b>      | -1149.61227 | 0.48007 | 33.9 | 35.3 | 98.1  | 0.07947 | -1149.21166 |
| <b>TS4</b>      | -1149.58759 | 0.47795 | 33.9 | 34.9 | 96.3  | 0.07847 | -1149.18811 |
| <b>Cp*Rh(I)</b> | -499.40626  | 0.23626 | 31.5 | 30.8 | 43.7  | 0.05035 | -499.22035  |
| <b>2a</b>       | -650.18142  | 0.24214 | 32.2 | 32.4 | 37.4  | 0.04841 | -649.98769  |
| <b>IV</b>       | -1471.75614 | 0.62339 | 34.6 | 36.7 | 125.1 | 0.09334 | -1471.22609 |
| <b>1A</b>       | -690.65386  | 0.29355 | 33.1 | 33.3 | 51.7  | 0.05613 | -690.41645  |
| <b>1B</b>       | -3224.99111 | 0.25560 | 32.4 | 34.3 | 49.7  | 0.05526 | -3224.79077 |
| <b>1A-TS1</b>   | -1647.11755 | 0.64437 | 35.2 | 36.5 | 142.1 | 0.10158 | -1646.57475 |
| <b>1B-TS1</b>   | -4181.45374 | 0.60675 | 34.8 | 37.0 | 147.8 | 0.10433 | -4180.95132 |
| <b>1A-TS3</b>   | -1418.00999 | 0.57443 | 34.5 | 35.9 | 118.1 | 0.08956 | -1417.52512 |
| <b>1B-TS3</b>   | -3952.34713 | 0.53654 | 34.9 | 36.2 | 120.1 | 0.09083 | -3951.90142 |
| <b>1A-TS4</b>   | -1188.89175 | 0.50802 | 34.0 | 35.0 | 100.6 | 0.08061 | -1188.46433 |
| <b>1B-TS4</b>   | -3723.22387 | 0.46944 | 34.5 | 35.6 | 103.1 | 0.08226 | -3722.83669 |

### 1a

| Center<br>Number | Atomic<br>Number | Atomic<br>Type | Coordinates (Angstroms) |           |           |
|------------------|------------------|----------------|-------------------------|-----------|-----------|
|                  |                  |                | X                       | Y         | Z         |
| 1                | 6                | 0              | -1.390622               | 0.688688  | -0.902686 |
| 2                | 6                | 0              | -0.989431               | -0.061972 | -2.015928 |
| 3                | 6                | 0              | -1.427473               | 0.282633  | -3.286433 |
| 4                | 6                | 0              | -2.271680               | 1.378475  | -3.470009 |
| 5                | 6                | 0              | -2.675731               | 2.127874  | -2.369693 |
| 6                | 6                | 0              | -2.237506               | 1.783909  | -1.094614 |
| 7                | 1                | 0              | -0.337163               | -0.915316 | -1.862283 |

|    |   |   |           |           |           |
|----|---|---|-----------|-----------|-----------|
| 8  | 1 | 0 | -1.112513 | -0.306602 | -4.142064 |
| 9  | 1 | 0 | -3.333649 | 2.980907  | -2.502625 |
| 10 | 1 | 0 | -2.553313 | 2.370610  | -0.235395 |
| 11 | 6 | 0 | -0.948945 | 0.353366  | 0.458016  |
| 12 | 7 | 0 | -0.151263 | -0.632999 | 0.652662  |
| 13 | 6 | 0 | -0.100823 | -0.156087 | 3.029386  |
| 14 | 1 | 0 | 0.094875  | 0.899590  | 2.806536  |
| 15 | 1 | 0 | -1.161073 | -0.265192 | 3.291334  |
| 16 | 7 | 0 | 0.261291  | -0.961734 | 1.885377  |
| 17 | 1 | 0 | 0.514142  | -0.440077 | 3.879810  |
| 18 | 1 | 0 | -2.612176 | 1.643873  | -4.465613 |
| 19 | 1 | 0 | -1.345869 | 0.974526  | 1.263556  |
| 20 | 6 | 0 | 1.111296  | -2.080051 | 1.986104  |
| 21 | 6 | 0 | 1.830886  | -2.519463 | 0.866625  |
| 22 | 6 | 0 | 1.243817  | -2.773216 | 3.194717  |
| 23 | 6 | 0 | 2.671953  | -3.618188 | 0.969558  |
| 24 | 1 | 0 | 1.720618  | -1.987075 | -0.069260 |
| 25 | 6 | 0 | 2.100449  | -3.866291 | 3.283982  |
| 26 | 1 | 0 | 0.658445  | -2.487654 | 4.061475  |
| 27 | 6 | 0 | 2.821532  | -4.297927 | 2.177073  |
| 28 | 1 | 0 | 3.226168  | -3.940104 | 0.093246  |
| 29 | 1 | 0 | 2.187544  | -4.390538 | 4.230544  |
| 30 | 1 | 0 | 3.485118  | -5.152535 | 2.249974  |

## I

| Center<br>Number | Atomic<br>Number | Atomic<br>Type | Coordinates (Angstroms) |           |           |
|------------------|------------------|----------------|-------------------------|-----------|-----------|
|                  |                  |                | X                       | Y         | Z         |
| 1                | 45               | 0              | -0.142451               | -0.077354 | 0.003466  |
| 2                | 6                | 0              | -1.577094               | 1.368482  | 0.698290  |
| 3                | 6                | 0              | -1.580895               | 1.328280  | -0.749676 |
| 4                | 6                | 0              | -1.951320               | 0.071790  | 1.172748  |
| 5                | 6                | 0              | -1.965668               | 0.007090  | -1.150036 |
| 6                | 6                | 0              | -2.181983               | -0.782674 | 0.033904  |
| 7                | 6                | 0              | 1.484327                | -1.984410 | 0.001687  |
| 8                | 8                | 0              | 1.004647                | -1.542599 | -1.089258 |
| 9                | 8                | 0              | 0.998238                | -1.555540 | 1.093998  |
| 10               | 6                | 0              | 2.618172                | -2.959180 | -0.001802 |
| 11               | 1                | 0              | 3.528241                | -2.354360 | 0.000230  |
| 12               | 1                | 0              | 2.592146                | -3.577406 | 0.895539  |
| 13               | 1                | 0              | 2.592162                | -3.571182 | -0.903441 |
| 14               | 6                | 0              | -1.152501               | 2.562903  | 1.489892  |

|    |   |   |           |           |           |
|----|---|---|-----------|-----------|-----------|
| 15 | 1 | 0 | -1.858933 | 3.386734  | 1.349341  |
| 16 | 1 | 0 | -1.094561 | 2.336358  | 2.555214  |
| 17 | 1 | 0 | -0.160406 | 2.879979  | 1.151958  |
| 18 | 6 | 0 | -1.167074 | 2.479847  | -1.608268 |
| 19 | 1 | 0 | -1.882694 | 3.302943  | -1.518431 |
| 20 | 1 | 0 | -0.180379 | 2.827878  | -1.286223 |
| 21 | 1 | 0 | -1.101970 | 2.193111  | -2.658598 |
| 22 | 6 | 0 | -2.012831 | -0.536259 | -2.542505 |
| 23 | 1 | 0 | -3.038951 | -0.807335 | -2.808603 |
| 24 | 1 | 0 | -1.647452 | 0.192451  | -3.266259 |
| 25 | 1 | 0 | -1.383768 | -1.427848 | -2.615555 |
| 26 | 6 | 0 | -2.588593 | -2.221056 | 0.082505  |
| 27 | 1 | 0 | -3.675234 | -2.318492 | 0.177093  |
| 28 | 1 | 0 | -2.275516 | -2.741409 | -0.824908 |
| 29 | 1 | 0 | -2.122670 | -2.723417 | 0.933291  |
| 30 | 6 | 0 | -1.992869 | -0.396875 | 2.591984  |
| 31 | 1 | 0 | -1.618827 | 0.365956  | 3.275069  |
| 32 | 1 | 0 | -3.019579 | -0.646692 | 2.876658  |
| 33 | 1 | 0 | -1.371655 | -1.289267 | 2.709297  |
| 34 | 8 | 0 | 1.384894  | 1.352942  | -0.001178 |
| 35 | 6 | 0 | 2.669544  | 1.134618  | 0.004100  |
| 36 | 8 | 0 | 3.225494  | 0.048352  | 0.017410  |
| 37 | 6 | 0 | 3.475714  | 2.428684  | -0.006535 |
| 38 | 1 | 0 | 3.216958  | 3.016264  | -0.890912 |
| 39 | 1 | 0 | 3.221586  | 3.026670  | 0.872284  |
| 40 | 1 | 0 | 4.541021  | 2.202295  | -0.007525 |

---

## TS1

---

| Center<br>Number | Atomic<br>Number | Atomic<br>Type | Coordinates (Angstroms) |           |           |
|------------------|------------------|----------------|-------------------------|-----------|-----------|
|                  |                  |                | X                       | Y         | Z         |
| 1                | 6                | 0              | -0.800474               | -1.035310 | -2.231276 |
| 2                | 6                | 0              | 0.170071                | -1.908806 | -2.731923 |
| 3                | 6                | 0              | 0.260326                | -2.113202 | -4.106436 |
| 4                | 6                | 0              | -0.619851               | -1.474013 | -4.976603 |
| 5                | 6                | 0              | -1.614350               | -0.634897 | -4.473042 |
| 6                | 6                | 0              | -1.711052               | -0.423164 | -3.102225 |
| 7                | 1                | 0              | 0.842765                | -2.415516 | -2.043629 |
| 8                | 1                | 0              | 1.019581                | -2.786001 | -4.492948 |
| 9                | 1                | 0              | -2.314265               | -0.152258 | -5.147737 |
| 10               | 1                | 0              | -2.485987               | 0.227329  | -2.702554 |
| 11               | 6                | 0              | -0.889730               | -0.776582 | -0.787415 |

|    |    |   |           |           |           |
|----|----|---|-----------|-----------|-----------|
| 12 | 7  | 0 | 0.164583  | -0.569820 | -0.082325 |
| 13 | 6  | 0 | -1.219415 | -0.558861 | 1.908098  |
| 14 | 1  | 0 | -1.938919 | 0.226030  | 1.647957  |
| 15 | 1  | 0 | -1.583353 | -1.550807 | 1.623219  |
| 16 | 7  | 0 | 0.058389  | -0.323495 | 1.254663  |
| 17 | 1  | 0 | -1.061727 | -0.558477 | 2.983037  |
| 18 | 1  | 0 | -0.546293 | -1.642608 | -6.046567 |
| 19 | 1  | 0 | -1.879679 | -0.758339 | -0.336665 |
| 20 | 6  | 0 | 1.264859  | -0.419277 | 1.967997  |
| 21 | 6  | 0 | 2.385814  | -0.992152 | 1.327412  |
| 22 | 6  | 0 | 1.365598  | 0.106380  | 3.261210  |
| 23 | 6  | 0 | 3.619123  | -0.961904 | 2.000677  |
| 24 | 6  | 0 | 2.596487  | 0.088468  | 3.905203  |
| 25 | 1  | 0 | 0.509968  | 0.561091  | 3.749476  |
| 26 | 6  | 0 | 3.734880  | -0.426439 | 3.277649  |
| 27 | 1  | 0 | 4.475098  | -1.399491 | 1.493803  |
| 28 | 1  | 0 | 2.671624  | 0.502113  | 4.906853  |
| 29 | 1  | 0 | 4.688717  | -0.427618 | 3.795171  |
| 30 | 45 | 0 | 2.277845  | 0.044067  | -0.751836 |
| 31 | 6  | 0 | 2.590170  | 2.116841  | -0.074852 |
| 32 | 6  | 0 | 3.818437  | 1.555200  | -0.611270 |
| 33 | 6  | 0 | 1.618299  | 2.094882  | -1.113390 |
| 34 | 6  | 0 | 3.593733  | 1.230459  | -1.986305 |
| 35 | 6  | 0 | 2.222245  | 1.526156  | -2.303022 |
| 36 | 6  | 0 | 2.413184  | 2.650714  | 1.309235  |
| 37 | 1  | 0 | 2.742787  | 3.694250  | 1.354111  |
| 38 | 1  | 0 | 1.366416  | 2.605488  | 1.617577  |
| 39 | 1  | 0 | 2.995523  | 2.070013  | 2.028721  |
| 40 | 6  | 0 | 5.113716  | 1.372000  | 0.111078  |
| 41 | 1  | 0 | 5.837497  | 2.121548  | -0.226926 |
| 42 | 1  | 0 | 4.979606  | 1.475090  | 1.189232  |
| 43 | 1  | 0 | 5.502196  | 0.370066  | -0.094069 |
| 44 | 6  | 0 | 4.602219  | 0.636151  | -2.912199 |
| 45 | 1  | 0 | 5.144029  | 1.436643  | -3.427377 |
| 46 | 1  | 0 | 5.306866  | 0.018227  | -2.352770 |
| 47 | 1  | 0 | 4.114443  | 0.005017  | -3.656658 |
| 48 | 6  | 0 | 1.573041  | 1.308227  | -3.632601 |
| 49 | 1  | 0 | 1.828024  | 2.119333  | -4.323084 |
| 50 | 1  | 0 | 1.907393  | 0.362007  | -4.064758 |
| 51 | 1  | 0 | 0.485828  | 1.254802  | -3.544502 |
| 52 | 6  | 0 | 0.190705  | 2.523838  | -0.991238 |
| 53 | 1  | 0 | -0.182477 | 2.346147  | 0.020421  |
| 54 | 1  | 0 | 0.098602  | 3.591607  | -1.214770 |
| 55 | 1  | 0 | -0.440467 | 1.969974  | -1.690230 |

|    |   |   |           |           |           |
|----|---|---|-----------|-----------|-----------|
| 56 | 8 | 0 | 1.714915  | -3.245277 | 0.047869  |
| 57 | 6 | 0 | 0.624717  | -3.711629 | 0.533530  |
| 58 | 8 | 0 | -0.117772 | -3.140455 | 1.342620  |
| 59 | 6 | 0 | 0.237641  | -5.089918 | -0.001483 |
| 60 | 1 | 0 | 0.007233  | -5.007144 | -1.068373 |
| 61 | 1 | 0 | 1.080901  | -5.777568 | 0.096433  |
| 62 | 1 | 0 | -0.631221 | -5.479040 | 0.529243  |
| 63 | 6 | 0 | 4.087094  | -3.628628 | -2.028157 |
| 64 | 1 | 0 | 5.092342  | -4.014228 | -1.862380 |
| 65 | 1 | 0 | 3.348241  | -4.233665 | -1.494717 |
| 66 | 1 | 0 | 3.838613  | -3.641968 | -3.091781 |
| 67 | 6 | 0 | 3.952826  | -2.228132 | -1.471344 |
| 68 | 8 | 0 | 4.808639  | -1.737698 | -0.731067 |
| 69 | 1 | 0 | 2.124160  | -1.950436 | 0.621991  |
| 70 | 8 | 0 | 2.860225  | -1.635572 | -1.839546 |

## II

| Center<br>Number | Atomic<br>Number | Atomic<br>Type | Coordinates (Angstroms) |           |           |
|------------------|------------------|----------------|-------------------------|-----------|-----------|
|                  |                  |                | X                       | Y         | Z         |
| 1                | 6                | 0              | -1.328009               | -0.070639 | -1.008871 |
| 2                | 6                | 0              | -0.756833               | -0.552777 | -2.193554 |
| 3                | 6                | 0              | -1.309145               | -0.197836 | -3.421490 |
| 4                | 6                | 0              | -2.419879               | 0.640680  | -3.486233 |
| 5                | 6                | 0              | -2.998489               | 1.112993  | -2.309165 |
| 6                | 6                | 0              | -2.465504               | 0.744831  | -1.080395 |
| 7                | 1                | 0              | 0.101726                | -1.215765 | -2.149334 |
| 8                | 1                | 0              | -0.870588               | -0.589678 | -4.334377 |
| 9                | 1                | 0              | -3.870564               | 1.757603  | -2.348833 |
| 10               | 1                | 0              | -2.924552               | 1.099947  | -0.160927 |
| 11               | 6                | 0              | -0.841901               | -0.469143 | 0.319297  |
| 12               | 7                | 0              | 0.393920                | -0.671655 | 0.619568  |
| 13               | 6                | 0              | -0.309998               | -2.053531 | 2.449310  |
| 14               | 1                | 0              | -1.052600               | -1.483591 | 3.016097  |
| 15               | 1                | 0              | -0.795467               | -2.629490 | 1.652411  |
| 16               | 7                | 0              | 0.697605                | -1.194205 | 1.843532  |
| 17               | 1                | 0              | 0.182331                | -2.751137 | 3.121599  |
| 18               | 1                | 0              | -2.843773               | 0.912174  | -4.447872 |
| 19               | 1                | 0              | -1.608315               | -0.622161 | 1.076136  |
| 20               | 6                | 0              | 2.064818                | -1.512864 | 2.010187  |
| 21               | 6                | 0              | 2.940833                | -1.240890 | 0.950867  |
| 22               | 6                | 0              | 2.546149                | -2.068156 | 3.196932  |

|    |    |   |           |           |           |
|----|----|---|-----------|-----------|-----------|
| 23 | 6  | 0 | 4.257755  | -1.669989 | 1.045953  |
| 24 | 6  | 0 | 3.882194  | -2.452168 | 3.289012  |
| 25 | 1  | 0 | 1.891823  | -2.199403 | 4.052294  |
| 26 | 6  | 0 | 4.736408  | -2.281080 | 2.207553  |
| 27 | 1  | 0 | 4.923656  | -1.529986 | 0.198034  |
| 28 | 1  | 0 | 4.245678  | -2.892345 | 4.211926  |
| 29 | 1  | 0 | 5.769272  | -2.609737 | 2.264355  |
| 30 | 45 | 0 | 2.158693  | -0.236180 | -0.557543 |
| 31 | 6  | 0 | 2.474698  | 1.960685  | -0.316751 |
| 32 | 6  | 0 | 3.747394  | 1.347621  | -0.502054 |
| 33 | 6  | 0 | 1.743429  | 1.884036  | -1.581963 |
| 34 | 6  | 0 | 3.716451  | 0.690089  | -1.770889 |
| 35 | 6  | 0 | 2.488934  | 1.100702  | -2.458527 |
| 36 | 6  | 0 | 2.041608  | 2.757278  | 0.875806  |
| 37 | 1  | 0 | 2.201155  | 3.829698  | 0.715243  |
| 38 | 1  | 0 | 0.978694  | 2.603485  | 1.081791  |
| 39 | 1  | 0 | 2.600260  | 2.458379  | 1.765644  |
| 40 | 6  | 0 | 4.878334  | 1.394846  | 0.478200  |
| 41 | 1  | 0 | 5.294328  | 2.407615  | 0.506504  |
| 42 | 1  | 0 | 4.552288  | 1.124709  | 1.485471  |
| 43 | 1  | 0 | 5.681492  | 0.711405  | 0.198828  |
| 44 | 6  | 0 | 4.783190  | -0.139757 | -2.416137 |
| 45 | 1  | 0 | 5.211729  | 0.373767  | -3.283689 |
| 46 | 1  | 0 | 5.596256  | -0.355172 | -1.719044 |
| 47 | 1  | 0 | 4.358520  | -1.092879 | -2.748032 |
| 48 | 6  | 0 | 2.123060  | 0.617464  | -3.825463 |
| 49 | 1  | 0 | 2.883869  | 0.905531  | -4.558536 |
| 50 | 1  | 0 | 2.054975  | -0.477735 | -3.820683 |
| 51 | 1  | 0 | 1.162950  | 1.025055  | -4.147191 |
| 52 | 6  | 0 | 0.443704  | 2.582260  | -1.830208 |
| 53 | 1  | 0 | -0.213046 | 2.514297  | -0.959313 |
| 54 | 1  | 0 | 0.624427  | 3.645601  | -2.025448 |
| 55 | 1  | 0 | -0.093462 | 2.160458  | -2.682122 |
| 56 | 8  | 0 | 2.126733  | -2.029551 | -1.669821 |
| 57 | 6  | 0 | 1.569365  | -3.118093 | -1.227361 |
| 58 | 8  | 0 | 0.865126  | -3.214452 | -0.228149 |
| 59 | 6  | 0 | 1.871455  | -4.334762 | -2.092179 |
| 60 | 1  | 0 | 1.697552  | -4.101021 | -3.144740 |
| 61 | 1  | 0 | 2.928412  | -4.592185 | -1.982347 |
| 62 | 1  | 0 | 1.256331  | -5.178637 | -1.782220 |

---

**AcOH**

---

| Center<br>Number | Atomic<br>Number | Atomic<br>Type | Coordinates (Angstroms) |          |           |
|------------------|------------------|----------------|-------------------------|----------|-----------|
|                  |                  |                | X                       | Y        | Z         |
| 1                | 6                | 0              | -3.959574               | 1.410072 | -1.475917 |
| 2                | 1                | 0              | -4.216356               | 0.857588 | -2.377757 |
| 3                | 1                | 0              | -4.451183               | 0.964395 | -0.609195 |
| 4                | 1                | 0              | -4.305230               | 2.442359 | -1.556635 |
| 5                | 6                | 0              | -2.473846               | 1.420767 | -1.230297 |
| 6                | 8                | 0              | -1.790491               | 0.753982 | -2.180515 |
| 7                | 1                | 0              | -0.853889               | 0.817667 | -1.937324 |
| 8                | 8                | 0              | -1.930621               | 1.957759 | -0.298632 |

## TS2

| Center<br>Number | Atomic<br>Number | Atomic<br>Type | Coordinates (Angstroms) |           |           |
|------------------|------------------|----------------|-------------------------|-----------|-----------|
|                  |                  |                | X                       | Y         | Z         |
| 1                | 6                | 0              | -1.194643               | -0.671511 | -0.878504 |
| 2                | 6                | 0              | -1.489488               | 0.608944  | -1.362206 |
| 3                | 6                | 0              | -2.305667               | 0.763689  | -2.473800 |
| 4                | 6                | 0              | -2.842519               | -0.358668 | -3.105871 |
| 5                | 6                | 0              | -2.564549               | -1.632639 | -2.618376 |
| 6                | 6                | 0              | -1.744773               | -1.793499 | -1.505115 |
| 7                | 1                | 0              | -1.076492               | 1.469041  | -0.845408 |
| 8                | 1                | 0              | -2.534125               | 1.758701  | -2.843596 |
| 9                | 1                | 0              | -2.985834               | -2.505321 | -3.106901 |
| 10               | 1                | 0              | -1.488025               | -2.781686 | -1.136405 |
| 11               | 6                | 0              | -0.345314               | -0.843183 | 0.314040  |
| 12               | 7                | 0              | 0.313386                | 0.161954  | 0.793761  |
| 13               | 6                | 0              | 0.106690                | 0.006775  | 3.159213  |
| 14               | 1                | 0              | -0.512678               | 0.895459  | 3.021505  |
| 15               | 1                | 0              | -0.549329               | -0.873499 | 3.264213  |
| 16               | 7                | 0              | 1.010348                | -0.085832 | 2.032514  |
| 17               | 1                | 0              | 0.687067                | 0.125001  | 4.076894  |
| 18               | 1                | 0              | -3.483559               | -0.237537 | -3.973619 |
| 19               | 1                | 0              | -0.312828               | -1.827617 | 0.785198  |
| 20               | 6                | 0              | 1.943407                | -1.148549 | 1.978122  |
| 21               | 6                | 0              | 2.656137                | -1.316484 | 0.776566  |
| 22               | 6                | 0              | 2.219215                | -1.971272 | 3.071758  |
| 23               | 6                | 0              | 3.619019                | -2.306331 | 0.687385  |
| 24               | 6                | 0              | 3.219528                | -2.940340 | 2.975352  |

|    |    |   |          |           |           |
|----|----|---|----------|-----------|-----------|
| 25 | 1  | 0 | 1.660731 | -1.868335 | 3.996467  |
| 26 | 6  | 0 | 3.917970 | -3.115173 | 1.789296  |
| 27 | 1  | 0 | 4.126691 | -2.467906 | -0.261001 |
| 28 | 1  | 0 | 3.432887 | -3.569795 | 3.833585  |
| 29 | 1  | 0 | 4.679392 | -3.884549 | 1.708186  |
| 30 | 45 | 0 | 2.160579 | -0.071859 | -0.697346 |
| 31 | 6  | 0 | 2.705993 | 2.056846  | -0.315650 |
| 32 | 6  | 0 | 3.875356 | 1.256107  | -0.269575 |
| 33 | 6  | 0 | 2.206032 | 2.078997  | -1.699080 |
| 34 | 6  | 0 | 3.979263 | 0.602766  | -1.552006 |
| 35 | 6  | 0 | 2.982995 | 1.207197  | -2.448468 |
| 36 | 6  | 0 | 2.126367 | 2.864433  | 0.802661  |
| 37 | 1  | 0 | 2.382300 | 3.923637  | 0.689813  |
| 38 | 1  | 0 | 1.037849 | 2.764239  | 0.814557  |
| 39 | 1  | 0 | 2.493318 | 2.512499  | 1.767993  |
| 40 | 6  | 0 | 4.780172 | 1.054470  | 0.905336  |
| 41 | 1  | 0 | 5.583348 | 1.798800  | 0.899119  |
| 42 | 1  | 0 | 4.228069 | 1.145983  | 1.843359  |
| 43 | 1  | 0 | 5.226159 | 0.057851  | 0.891004  |
| 44 | 6  | 0 | 5.038965 | -0.346762 | -2.013458 |
| 45 | 1  | 0 | 5.771349 | 0.163049  | -2.649290 |
| 46 | 1  | 0 | 5.569848 | -0.786743 | -1.166683 |
| 47 | 1  | 0 | 4.581406 | -1.156685 | -2.590148 |
| 48 | 6  | 0 | 2.795146 | 0.779794  | -3.867594 |
| 49 | 1  | 0 | 3.714741 | 0.926434  | -4.443133 |
| 50 | 1  | 0 | 2.537308 | -0.285734 | -3.888748 |
| 51 | 1  | 0 | 1.993348 | 1.342897  | -4.348943 |
| 52 | 6  | 0 | 1.042882 | 2.891957  | -2.180071 |
| 53 | 1  | 0 | 0.414339 | 3.205813  | -1.343417 |
| 54 | 1  | 0 | 1.389111 | 3.798521  | -2.688264 |
| 55 | 1  | 0 | 0.419550 | 2.325686  | -2.877070 |
| 56 | 8  | 0 | 1.896998 | -1.677804 | -2.024469 |
| 57 | 6  | 0 | 1.311766 | -2.803659 | -1.778942 |
| 58 | 8  | 0 | 0.795551 | -3.139473 | -0.715178 |
| 59 | 6  | 0 | 1.238289 | -3.726862 | -2.987661 |
| 60 | 1  | 0 | 0.394205 | -3.406803 | -3.607501 |
| 61 | 1  | 0 | 2.144890 | -3.657879 | -3.590422 |
| 62 | 1  | 0 | 1.067324 | -4.752984 | -2.662887 |

---

II'

---



| Center<br>Number | Atomic<br>Number | Atomic<br>Type | Coordinates (Angstroms) |           |           |
|------------------|------------------|----------------|-------------------------|-----------|-----------|
|                  |                  |                | X                       | Y         | Z         |
| 1                | 6                | 0              | -1.186381               | -0.165262 | -0.823237 |
| 2                | 6                | 0              | -1.902903               | 1.017243  | -0.593294 |
| 3                | 6                | 0              | -2.770503               | 1.512631  | -1.558896 |
| 4                | 6                | 0              | -2.938951               | 0.838244  | -2.767943 |
| 5                | 6                | 0              | -2.240494               | -0.345617 | -2.997128 |
| 6                | 6                | 0              | -1.369604               | -0.847578 | -2.033400 |
| 7                | 1                | 0              | -1.777840               | 1.530629  | 0.355117  |
| 8                | 1                | 0              | -3.321190               | 2.428811  | -1.367440 |
| 9                | 1                | 0              | -2.376397               | -0.883980 | -3.930115 |
| 10               | 1                | 0              | -0.828844               | -1.777216 | -2.194320 |
| 11               | 6                | 0              | -0.218674               | -0.701011 | 0.151876  |
| 12               | 7                | 0              | -0.025348               | -0.040487 | 1.257579  |
| 13               | 6                | 0              | 0.765440                | 0.263892  | 3.437304  |
| 14               | 1                | 0              | 0.241380                | 1.204434  | 3.265492  |
| 15               | 1                | 0              | 0.197649                | -0.320657 | 4.171330  |
| 16               | 7                | 0              | 0.868153                | -0.418159 | 2.159806  |
| 17               | 1                | 0              | 1.765018                | 0.453761  | 3.838194  |
| 18               | 1                | 0              | -3.616312               | 1.228603  | -3.520724 |
| 19               | 1                | 0              | 0.185275                | -1.707319 | -0.036431 |
| 20               | 6                | 0              | 1.867389                | -1.410351 | 1.966031  |
| 21               | 6                | 0              | 2.549026                | -1.527093 | 0.738901  |
| 22               | 6                | 0              | 2.232742                | -2.205651 | 3.057365  |
| 23               | 6                | 0              | 3.580652                | -2.458994 | 0.650703  |
| 24               | 6                | 0              | 3.282707                | -3.110471 | 2.950460  |
| 25               | 1                | 0              | 1.682662                | -2.122619 | 3.989859  |
| 26               | 6                | 0              | 3.959598                | -3.239483 | 1.743475  |
| 27               | 1                | 0              | 4.083210                | -2.585348 | -0.305378 |
| 28               | 1                | 0              | 3.556321                | -3.719320 | 3.805786  |
| 29               | 1                | 0              | 4.772524                | -3.952282 | 1.644699  |
| 30               | 45               | 0              | 2.057805                | -0.396164 | -0.838084 |
| 31               | 6                | 0              | 2.229925                | 1.810199  | -0.531927 |
| 32               | 6                | 0              | 3.491024                | 1.193446  | -0.322570 |
| 33               | 6                | 0              | 1.876161                | 1.683672  | -1.953686 |
| 34               | 6                | 0              | 3.830653                | 0.513107  | -1.548336 |
| 35               | 6                | 0              | 2.852150                | 0.910952  | -2.569363 |
| 36               | 6                | 0              | 1.468786                | 2.630041  | 0.462901  |
| 37               | 1                | 0              | 1.727885                | 3.690079  | 0.361710  |
| 38               | 1                | 0              | 0.392307                | 2.519324  | 0.317005  |
| 39               | 1                | 0              | 1.699907                | 2.315054  | 1.483036  |
| 40               | 6                | 0              | 4.284296                | 1.181915  | 0.946889  |
| 41               | 1                | 0              | 4.972621                | 2.032804  | 0.977222  |

|    |   |   |           |           |           |
|----|---|---|-----------|-----------|-----------|
| 42 | 1 | 0 | 3.626896  | 1.238677  | 1.818325  |
| 43 | 1 | 0 | 4.863888  | 0.260584  | 1.037411  |
| 44 | 6 | 0 | 5.052373  | -0.296012 | -1.841847 |
| 45 | 1 | 0 | 5.765039  | 0.278825  | -2.443355 |
| 46 | 1 | 0 | 5.551437  | -0.606257 | -0.921409 |
| 47 | 1 | 0 | 4.768034  | -1.193627 | -2.400237 |
| 48 | 6 | 0 | 2.872766  | 0.405466  | -3.975080 |
| 49 | 1 | 0 | 3.786178  | 0.719630  | -4.490587 |
| 50 | 1 | 0 | 2.838626  | -0.690072 | -3.966661 |
| 51 | 1 | 0 | 2.012215  | 0.775079  | -4.536402 |
| 52 | 6 | 0 | 0.646643  | 2.249368  | -2.601666 |
| 53 | 1 | 0 | 0.082177  | 2.868249  | -1.902428 |
| 54 | 1 | 0 | 0.923307  | 2.872817  | -3.457422 |
| 55 | 1 | 0 | -0.026069 | 1.460971  | -2.955401 |
| 56 | 8 | 0 | 2.280223  | -2.102482 | -2.049792 |
| 57 | 6 | 0 | 1.604436  | -3.197494 | -1.908309 |
| 58 | 8 | 0 | 0.653812  | -3.361452 | -1.146758 |
| 59 | 6 | 0 | 2.107221  | -4.338059 | -2.780150 |
| 60 | 1 | 0 | 2.250983  | -3.996472 | -3.807318 |
| 61 | 1 | 0 | 3.079969  | -4.665026 | -2.401501 |
| 62 | 1 | 0 | 1.407472  | -5.171928 | -2.748788 |

---

### TS3

| Center<br>Number | Atomic<br>Number | Atomic<br>Type | Coordinates (Angstroms) |           |           |
|------------------|------------------|----------------|-------------------------|-----------|-----------|
|                  |                  |                | X                       | Y         | Z         |
| 1                | 6                | 0              | -1.024236               | 0.081244  | -0.944213 |
| 2                | 6                | 0              | -1.943907               | 1.062462  | -0.546993 |
| 3                | 6                | 0              | -2.851295               | 1.593813  | -1.456825 |
| 4                | 6                | 0              | -2.867003               | 1.151001  | -2.779022 |
| 5                | 6                | 0              | -1.968705               | 0.165913  | -3.180348 |
| 6                | 6                | 0              | -1.055512               | -0.362818 | -2.272914 |
| 7                | 1                | 0              | -1.930753               | 1.401641  | 0.483908  |
| 8                | 1                | 0              | -3.550310               | 2.359490  | -1.133240 |
| 9                | 1                | 0              | -1.975404               | -0.190453 | -4.206210 |
| 10               | 1                | 0              | -0.337390               | -1.112912 | -2.597228 |
| 11               | 6                | 0              | 0.001212                | -0.477784 | -0.024293 |
| 12               | 7                | 0              | -0.100048               | -0.083415 | 1.217894  |
| 13               | 6                | 0              | 0.368758                | -0.023473 | 3.494941  |
| 14               | 1                | 0              | -0.298942               | 0.828199  | 3.380059  |

|    |    |   |           |           |           |
|----|----|---|-----------|-----------|-----------|
| 15 | 1  | 0 | -0.158126 | -0.815699 | 4.040130  |
| 16 | 7  | 0 | 0.753744  | -0.447718 | 2.158694  |
| 17 | 1  | 0 | 1.255957  | 0.268711  | 4.062150  |
| 18 | 1  | 0 | -3.575238 | 1.568221  | -3.487687 |
| 19 | 1  | 0 | 0.279156  | -1.728792 | -0.293740 |
| 20 | 6  | 0 | 1.844011  | -1.340761 | 1.992808  |
| 21 | 6  | 0 | 2.525798  | -1.454996 | 0.771043  |
| 22 | 6  | 0 | 2.263581  | -2.091084 | 3.102006  |
| 23 | 6  | 0 | 3.598522  | -2.343676 | 0.692790  |
| 24 | 6  | 0 | 3.352912  | -2.947435 | 3.005903  |
| 25 | 1  | 0 | 1.724321  | -2.027111 | 4.040416  |
| 26 | 6  | 0 | 4.026032  | -3.079656 | 1.796656  |
| 27 | 1  | 0 | 4.105101  | -2.464528 | -0.262276 |
| 28 | 1  | 0 | 3.659808  | -3.520240 | 3.874891  |
| 29 | 1  | 0 | 4.872677  | -3.753626 | 1.708985  |
| 30 | 45 | 0 | 2.044104  | -0.400614 | -0.851166 |
| 31 | 6  | 0 | 2.334643  | 1.764290  | -0.588434 |
| 32 | 6  | 0 | 3.606146  | 1.124057  | -0.412680 |
| 33 | 6  | 0 | 1.971224  | 1.678459  | -2.000116 |
| 34 | 6  | 0 | 3.926018  | 0.476307  | -1.639089 |
| 35 | 6  | 0 | 2.914444  | 0.858684  | -2.623307 |
| 36 | 6  | 0 | 1.605602  | 2.584636  | 0.432171  |
| 37 | 1  | 0 | 1.954773  | 3.623272  | 0.421261  |
| 38 | 1  | 0 | 0.530999  | 2.578802  | 0.231057  |
| 39 | 1  | 0 | 1.756417  | 2.179854  | 1.436377  |
| 40 | 6  | 0 | 4.414510  | 1.109919  | 0.847625  |
| 41 | 1  | 0 | 5.083767  | 1.976234  | 0.878318  |
| 42 | 1  | 0 | 3.767922  | 1.144899  | 1.727929  |
| 43 | 1  | 0 | 5.018240  | 0.202893  | 0.923133  |
| 44 | 6  | 0 | 5.150173  | -0.326414 | -1.953012 |
| 45 | 1  | 0 | 5.882876  | 0.272014  | -2.506478 |
| 46 | 1  | 0 | 5.630568  | -0.685344 | -1.039799 |
| 47 | 1  | 0 | 4.895929  | -1.196876 | -2.565223 |
| 48 | 6  | 0 | 2.917283  | 0.364481  | -4.036239 |
| 49 | 1  | 0 | 3.789439  | 0.743071  | -4.579967 |
| 50 | 1  | 0 | 2.956595  | -0.729525 | -4.054818 |
| 51 | 1  | 0 | 2.018620  | 0.679611  | -4.569145 |
| 52 | 6  | 0 | 0.803870  | 2.374814  | -2.626434 |
| 53 | 1  | 0 | -0.075720 | 2.354517  | -1.978332 |
| 54 | 1  | 0 | 1.055003  | 3.423629  | -2.822183 |
| 55 | 1  | 0 | 0.518999  | 1.910873  | -3.572280 |
| 56 | 8  | 0 | 1.975103  | -2.277345 | -1.911068 |
| 57 | 6  | 0 | 1.177374  | -3.180099 | -1.525191 |
| 58 | 8  | 0 | 0.285531  | -3.014489 | -0.649543 |

|    |   |   |          |           |           |
|----|---|---|----------|-----------|-----------|
| 59 | 6 | 0 | 1.328450 | -4.556016 | -2.130162 |
| 60 | 1 | 0 | 0.356016 | -5.041962 | -2.205631 |
| 61 | 1 | 0 | 1.813630 | -4.493348 | -3.103637 |
| 62 | 1 | 0 | 1.957542 | -5.149257 | -1.460143 |

---

### III

| Center<br>Number | Atomic<br>Number | Atomic<br>Type | Coordinates (Angstroms) |           |           |
|------------------|------------------|----------------|-------------------------|-----------|-----------|
|                  |                  |                | X                       | Y         | Z         |
| 1                | 6                | 0              | -0.706839               | -0.134172 | -1.093545 |
| 2                | 6                | 0              | -1.824639               | 0.687760  | -0.900733 |
| 3                | 6                | 0              | -2.683991               | 0.981266  | -1.953504 |
| 4                | 6                | 0              | -2.452164               | 0.447847  | -3.220496 |
| 5                | 6                | 0              | -1.359824               | -0.392710 | -3.420231 |
| 6                | 6                | 0              | -0.495430               | -0.677971 | -2.366044 |
| 7                | 1                | 0              | -1.997104               | 1.099993  | 0.088608  |
| 8                | 1                | 0              | -3.536170               | 1.633596  | -1.787420 |
| 9                | 1                | 0              | -1.182161               | -0.832359 | -4.397623 |
| 10               | 1                | 0              | 0.356170                | -1.336630 | -2.523145 |
| 11               | 6                | 0              | 0.260099                | -0.394241 | 0.015804  |
| 12               | 7                | 0              | -0.308093               | -0.511235 | 1.167434  |
| 13               | 6                | 0              | -0.484482               | -0.843949 | 3.466803  |
| 14               | 1                | 0              | -1.448675               | -0.432663 | 3.179177  |
| 15               | 1                | 0              | -0.616286               | -1.884606 | 3.787966  |
| 16               | 7                | 0              | 0.377126                | -0.748271 | 2.301419  |
| 17               | 1                | 0              | -0.073545               | -0.266267 | 4.299659  |
| 18               | 1                | 0              | -3.122526               | 0.678233  | -4.042441 |
| 19               | 6                | 0              | 1.692095                | -1.194566 | 2.366727  |
| 20               | 6                | 0              | 2.552222                | -1.123143 | 1.251960  |
| 21               | 6                | 0              | 2.163318                | -1.738811 | 3.585327  |
| 22               | 6                | 0              | 3.849540                | -1.654494 | 1.398014  |
| 23               | 6                | 0              | 3.443423                | -2.250819 | 3.680450  |
| 24               | 1                | 0              | 1.522945                | -1.775486 | 4.457322  |
| 25               | 6                | 0              | 4.298430                | -2.229185 | 2.576262  |
| 26               | 1                | 0              | 4.525580                | -1.612573 | 0.545661  |
| 27               | 1                | 0              | 3.775872                | -2.676401 | 4.622380  |
| 28               | 1                | 0              | 5.298559                | -2.645125 | 2.642766  |
| 29               | 45               | 0              | 2.170556                | -0.267373 | -0.485933 |
| 30               | 6                | 0              | 2.792094                | 1.747449  | -0.505971 |
| 31               | 6                | 0              | 4.078971                | 1.067423  | -0.653903 |

|    |   |   |          |           |           |
|----|---|---|----------|-----------|-----------|
| 32 | 6 | 0 | 2.103569 | 1.679539  | -1.794718 |
| 33 | 6 | 0 | 4.039479 | 0.390458  | -1.865447 |
| 34 | 6 | 0 | 2.803689 | 0.770552  | -2.576844 |
| 35 | 6 | 0 | 2.447247 | 2.681837  | 0.612086  |
| 36 | 1 | 0 | 2.863767 | 3.679107  | 0.425308  |
| 37 | 1 | 0 | 1.364650 | 2.777339  | 0.720699  |
| 38 | 1 | 0 | 2.848016 | 2.313456  | 1.559150  |
| 39 | 6 | 0 | 5.170840 | 1.108876  | 0.368905  |
| 40 | 1 | 0 | 5.634372 | 2.101672  | 0.381107  |
| 41 | 1 | 0 | 4.784878 | 0.900523  | 1.370188  |
| 42 | 1 | 0 | 5.953249 | 0.377115  | 0.156951  |
| 43 | 6 | 0 | 5.069327 | -0.530873 | -2.442171 |
| 44 | 1 | 0 | 5.543660 | -0.082427 | -3.322407 |
| 45 | 1 | 0 | 5.852915 | -0.759309 | -1.717003 |
| 46 | 1 | 0 | 4.618670 | -1.476174 | -2.760062 |
| 47 | 6 | 0 | 2.459658 | 0.290742  | -3.952299 |
| 48 | 1 | 0 | 3.089460 | 0.779542  | -4.704565 |
| 49 | 1 | 0 | 2.620439 | -0.788225 | -4.043534 |
| 50 | 1 | 0 | 1.414550 | 0.498082  | -4.191637 |
| 51 | 6 | 0 | 0.864608 | 2.442712  | -2.141418 |
| 52 | 1 | 0 | 0.208813 | 2.546282  | -1.274148 |
| 53 | 1 | 0 | 1.130594 | 3.448736  | -2.485277 |
| 54 | 1 | 0 | 0.286937 | 1.949599  | -2.927209 |

#### TS4

| Center<br>Number | Atomic<br>Number | Atomic<br>Type | Coordinates (Angstroms) |           |           |
|------------------|------------------|----------------|-------------------------|-----------|-----------|
|                  |                  |                | X                       | Y         | Z         |
| 1                | 6                | 0              | -0.248982               | -1.432604 | -0.980689 |
| 2                | 6                | 0              | -1.199485               | -0.742965 | -1.782959 |
| 3                | 6                | 0              | -1.308473               | -1.033006 | -3.121431 |
| 4                | 6                | 0              | -0.460162               | -1.991086 | -3.722218 |
| 5                | 6                | 0              | 0.455402                | -2.680650 | -2.957671 |
| 6                | 6                | 0              | 0.575506                | -2.423646 | -1.573833 |
| 7                | 1                | 0              | -1.817255               | 0.015862  | -1.312789 |
| 8                | 1                | 0              | -2.043557               | -0.512293 | -3.727569 |
| 9                | 1                | 0              | 1.078747                | -3.446384 | -3.409070 |
| 10               | 1                | 0              | 1.167241                | -3.079193 | -0.944496 |
| 11               | 6                | 0              | 0.164514                | -0.954262 | 0.323675  |
| 12               | 7                | 0              | -0.464100               | -0.513640 | 1.342810  |

|    |    |   |           |           |           |
|----|----|---|-----------|-----------|-----------|
| 13 | 6  | 0 | -0.243867 | 0.218404  | 3.585586  |
| 14 | 1  | 0 | -1.211157 | 0.657833  | 3.348968  |
| 15 | 1  | 0 | -0.390176 | -0.671092 | 4.212513  |
| 16 | 7  | 0 | 0.405012  | -0.107939 | 2.330545  |
| 17 | 1  | 0 | 0.353393  | 0.950072  | 4.134334  |
| 18 | 1  | 0 | -0.551803 | -2.199629 | -4.783279 |
| 19 | 6  | 0 | 1.611619  | -0.800066 | 2.321083  |
| 20 | 6  | 0 | 1.971976  | -1.405499 | 1.097288  |
| 21 | 6  | 0 | 2.378770  | -0.993603 | 3.481613  |
| 22 | 6  | 0 | 3.030102  | -2.331901 | 1.118185  |
| 23 | 6  | 0 | 3.460818  | -1.856616 | 3.443758  |
| 24 | 1  | 0 | 2.112442  | -0.496047 | 4.407885  |
| 25 | 6  | 0 | 3.774733  | -2.551462 | 2.269533  |
| 26 | 1  | 0 | 3.312447  | -2.839185 | 0.198398  |
| 27 | 1  | 0 | 4.047715  | -2.015891 | 4.342920  |
| 28 | 1  | 0 | 4.610148  | -3.244223 | 2.252345  |
| 29 | 45 | 0 | 1.772699  | -0.425112 | -0.742194 |
| 30 | 6  | 0 | 3.174822  | 1.196963  | -0.239768 |
| 31 | 6  | 0 | 3.860596  | 0.435439  | -1.255552 |
| 32 | 6  | 0 | 2.059273  | 1.896191  | -0.853189 |
| 33 | 6  | 0 | 3.063064  | 0.510166  | -2.414275 |
| 34 | 6  | 0 | 1.968079  | 1.447326  | -2.177611 |
| 35 | 6  | 0 | 3.690972  | 1.429664  | 1.147783  |
| 36 | 1  | 0 | 4.460658  | 2.210242  | 1.143573  |
| 37 | 1  | 0 | 2.887796  | 1.746934  | 1.818146  |
| 38 | 1  | 0 | 4.127931  | 0.516632  | 1.563703  |
| 39 | 6  | 0 | 5.142058  | -0.313785 | -1.053989 |
| 40 | 1  | 0 | 6.006512  | 0.359403  | -1.090687 |
| 41 | 1  | 0 | 5.155224  | -0.817372 | -0.082030 |
| 42 | 1  | 0 | 5.282387  | -1.076019 | -1.824684 |
| 43 | 6  | 0 | 3.296730  | -0.165043 | -3.731422 |
| 44 | 1  | 0 | 3.676278  | 0.546209  | -4.473950 |
| 45 | 1  | 0 | 4.020818  | -0.977554 | -3.640455 |
| 46 | 1  | 0 | 2.364269  | -0.585991 | -4.122903 |
| 47 | 6  | 0 | 0.950261  | 1.818316  | -3.211206 |
| 48 | 1  | 0 | 1.375491  | 2.487540  | -3.967938 |
| 49 | 1  | 0 | 0.573292  | 0.928960  | -3.727518 |
| 50 | 1  | 0 | 0.092032  | 2.322614  | -2.760713 |
| 51 | 6  | 0 | 1.146817  | 2.843819  | -0.134702 |
| 52 | 1  | 0 | 0.895631  | 2.461373  | 0.859107  |
| 53 | 1  | 0 | 1.609042  | 3.829646  | -0.011350 |
| 54 | 1  | 0 | 0.209749  | 2.978796  | -0.679971 |

---

**Cp\*Rh(I)**

---

| Center<br>Number | Atomic<br>Number | Atomic<br>Type | Coordinates (Angstroms) |           |           |
|------------------|------------------|----------------|-------------------------|-----------|-----------|
|                  |                  |                | X                       | Y         | Z         |
| 1                | 45               | 0              | -4.598555               | -0.323288 | -0.522850 |
| 2                | 6                | 0              | -4.184355               | -2.667563 | 0.477089  |
| 3                | 6                | 0              | -3.306824               | -2.056590 | -0.557360 |
| 4                | 6                | 0              | -4.210921               | -1.818388 | 1.544227  |
| 5                | 6                | 0              | -2.601210               | -0.956930 | 0.026211  |
| 6                | 6                | 0              | -3.349144               | -0.652743 | 1.208370  |
| 7                | 6                | 0              | -4.949589               | -3.933384 | 0.254434  |
| 8                | 1                | 0              | -4.275907               | -4.775832 | 0.058947  |
| 9                | 1                | 0              | -5.563736               | -4.188813 | 1.120502  |
| 10               | 1                | 0              | -5.614807               | -3.849296 | -0.612492 |
| 11               | 6                | 0              | -2.940499               | -2.766311 | -1.826825 |
| 12               | 1                | 0              | -2.249683               | -3.596075 | -1.630466 |
| 13               | 1                | 0              | -3.827567               | -3.187110 | -2.310232 |
| 14               | 1                | 0              | -2.459725               | -2.088396 | -2.536216 |
| 15               | 6                | 0              | -1.353399               | -0.292538 | -0.470168 |
| 16               | 1                | 0              | -0.457936               | -0.765869 | -0.047086 |
| 17               | 1                | 0              | -1.277526               | -0.352619 | -1.558713 |
| 18               | 1                | 0              | -1.330531               | 0.765265  | -0.196662 |
| 19               | 6                | 0              | -3.030972               | 0.429249  | 2.197014  |
| 20               | 1                | 0              | -2.358638               | 0.060718  | 2.982040  |
| 21               | 1                | 0              | -2.546596               | 1.279830  | 1.711591  |
| 22               | 1                | 0              | -3.938977               | 0.792432  | 2.688167  |
| 23               | 6                | 0              | -5.015067               | -1.902972 | 2.802654  |
| 24               | 1                | 0              | -5.616535               | -2.813896 | 2.834401  |
| 25               | 1                | 0              | -4.370438               | -1.893548 | 3.689140  |
| 26               | 1                | 0              | -5.697158               | -1.050182 | 2.894474  |

---

**2a**

---

| Center<br>Number | Atomic<br>Number | Atomic<br>Type | Coordinates (Angstroms) |          |           |
|------------------|------------------|----------------|-------------------------|----------|-----------|
|                  |                  |                | X                       | Y        | Z         |
| 1                | 6                | 0              | -12.373749              | 3.924353 | -3.059502 |
| 2                | 6                | 0              | -11.342879              | 4.925126 | -3.020281 |
| 3                | 6                | 0              | -11.627328              | 5.665953 | -1.855228 |

---

|    |   |   |            |           |           |
|----|---|---|------------|-----------|-----------|
| 4  | 1 | 0 | -9.937838  | 4.676455  | -4.658504 |
| 5  | 6 | 0 | -10.207711 | 5.255645  | -3.781904 |
| 6  | 6 | 0 | -10.845026 | 6.754983  | -1.439449 |
| 7  | 6 | 0 | -9.752335  | 7.068680  | -2.221285 |
| 8  | 6 | 0 | -9.429796  | 6.321988  | -3.377590 |
| 9  | 1 | 0 | -11.086539 | 7.319560  | -0.544945 |
| 10 | 1 | 0 | -9.119204  | 7.903579  | -1.938719 |
| 11 | 1 | 0 | -8.550157  | 6.593122  | -3.951365 |
| 12 | 7 | 0 | -12.729101 | 5.095068  | -1.294498 |
| 13 | 7 | 0 | -13.177915 | 4.052539  | -2.019550 |
| 14 | 6 | 0 | -13.429524 | 5.518508  | -0.105864 |
| 15 | 1 | 0 | -12.743525 | 5.561048  | 0.744903  |
| 16 | 1 | 0 | -13.886857 | 6.502110  | -0.249722 |
| 17 | 1 | 0 | -14.206529 | 4.781543  | 0.089608  |
| 18 | 6 | 0 | -12.591623 | 2.859083  | -4.050393 |
| 19 | 6 | 0 | -12.224304 | 3.039114  | -5.387401 |
| 20 | 6 | 0 | -13.187859 | 1.652926  | -3.665945 |
| 21 | 6 | 0 | -12.433627 | 2.026454  | -6.318465 |
| 22 | 1 | 0 | -11.804116 | 3.988425  | -5.704761 |
| 23 | 6 | 0 | -13.402315 | 0.646377  | -4.599024 |
| 24 | 1 | 0 | -13.475276 | 1.521246  | -2.627946 |
| 25 | 6 | 0 | -13.020408 | 0.826669  | -5.927304 |
| 26 | 1 | 0 | -12.147525 | 2.180574  | -7.354134 |
| 27 | 1 | 0 | -13.863787 | -0.285768 | -4.288187 |
| 28 | 1 | 0 | -13.183137 | 0.037509  | -6.654277 |

---

#### IV

| Center<br>Number | Atomic<br>Number | Atomic<br>Type | Coordinates (Angstroms) |           |           |
|------------------|------------------|----------------|-------------------------|-----------|-----------|
|                  |                  |                | X                       | Y         | Z         |
| 1                | 45               | 0              | -4.598555               | -0.323288 | -0.522850 |
| 2                | 6                | 0              | -4.184355               | -2.667563 | 0.477089  |
| 3                | 6                | 0              | -3.306824               | -2.056590 | -0.557360 |
| 4                | 6                | 0              | -4.210921               | -1.818388 | 1.544227  |
| 5                | 6                | 0              | -2.601210               | -0.956930 | 0.026211  |
| 6                | 6                | 0              | -3.349144               | -0.652743 | 1.208370  |
| 7                | 6                | 0              | -4.949589               | -3.933384 | 0.254434  |
| 8                | 1                | 0              | -4.275907               | -4.775832 | 0.058947  |
| 9                | 1                | 0              | -5.563736               | -4.188813 | 1.120502  |
| 10               | 1                | 0              | -5.614807               | -3.849296 | -0.612492 |



|    |   |   |           |           |           |
|----|---|---|-----------|-----------|-----------|
| 11 | 6 | 0 | -2.940499 | -2.766311 | -1.826825 |
| 12 | 1 | 0 | -2.249683 | -3.596075 | -1.630466 |
| 13 | 1 | 0 | -3.827567 | -3.187110 | -2.310232 |
| 14 | 1 | 0 | -2.459725 | -2.088396 | -2.536216 |
| 15 | 6 | 0 | -1.353399 | -0.292538 | -0.470168 |
| 16 | 1 | 0 | -0.457936 | -0.765869 | -0.047086 |
| 17 | 1 | 0 | -1.277526 | -0.352619 | -1.558713 |
| 18 | 1 | 0 | -1.330531 | 0.765265  | -0.196662 |
| 19 | 6 | 0 | -3.030972 | 0.429249  | 2.197014  |
| 20 | 1 | 0 | -2.358638 | 0.060718  | 2.982040  |
| 21 | 1 | 0 | -2.546596 | 1.279830  | 1.711591  |
| 22 | 1 | 0 | -3.938977 | 0.792432  | 2.688167  |
| 23 | 6 | 0 | -5.015067 | -1.902972 | 2.802654  |
| 24 | 1 | 0 | -5.616535 | -2.813896 | 2.834401  |
| 25 | 1 | 0 | -4.370438 | -1.893548 | 3.689140  |
| 26 | 1 | 0 | -5.697158 | -1.050182 | 2.894474  |

---

## 1A

| Center<br>Number | Atomic<br>Number | Atomic<br>Type | Coordinates (Angstroms) |           |           |
|------------------|------------------|----------------|-------------------------|-----------|-----------|
|                  |                  |                | X                       | Y         | Z         |
| 1                | 6                | 0              | -1.425589               | 0.687305  | -0.868850 |
| 2                | 6                | 0              | -1.051790               | -0.108104 | -1.959983 |
| 3                | 6                | 0              | -1.460051               | 0.209266  | -3.246733 |
| 4                | 6                | 0              | -2.254759               | 1.332638  | -3.463034 |
| 5                | 6                | 0              | -2.630977               | 2.125103  | -2.384395 |
| 6                | 6                | 0              | -2.229924               | 1.822807  | -1.082081 |
| 7                | 1                | 0              | -0.439310               | -0.983599 | -1.771452 |
| 8                | 1                | 0              | -1.162425               | -0.419029 | -4.080135 |
| 9                | 1                | 0              | -3.250305               | 3.002575  | -2.551322 |
| 10               | 6                | 0              | -0.983610               | 0.337067  | 0.490619  |
| 11               | 7                | 0              | -0.169854               | -0.641511 | 0.668162  |
| 12               | 6                | 0              | -0.140141               | -0.207489 | 3.053660  |
| 13               | 1                | 0              | 0.044470                | 0.854822  | 2.852315  |
| 14               | 1                | 0              | -1.201135               | -0.333265 | 3.305120  |
| 15               | 7                | 0              | 0.239114                | -0.986918 | 1.897188  |
| 16               | 1                | 0              | 0.471566                | -0.500805 | 3.903184  |
| 17               | 1                | 0              | -2.581054               | 1.590346  | -4.465497 |
| 18               | 1                | 0              | -1.383538               | 0.924458  | 1.315872  |
| 19               | 6                | 0              | 1.113543                | -2.087900 | 1.981937  |

|    |   |   |           |           |           |
|----|---|---|-----------|-----------|-----------|
| 20 | 6 | 0 | 1.855184  | -2.485333 | 0.861065  |
| 21 | 6 | 0 | 1.247592  | -2.805411 | 3.175942  |
| 22 | 6 | 0 | 2.718864  | -3.567888 | 0.949013  |
| 23 | 1 | 0 | 1.744046  | -1.933639 | -0.063561 |
| 24 | 6 | 0 | 2.126632  | -3.881562 | 3.250574  |
| 25 | 1 | 0 | 0.646408  | -2.551721 | 4.041827  |
| 26 | 6 | 0 | 2.869467  | -4.271739 | 2.142438  |
| 27 | 1 | 0 | 3.289986  | -3.857786 | 0.072422  |
| 28 | 1 | 0 | 2.214231  | -4.425734 | 4.185760  |
| 29 | 1 | 0 | 3.550499  | -5.113419 | 2.203899  |
| 30 | 6 | 0 | -2.659829 | 2.715556  | 0.056939  |
| 31 | 1 | 0 | -3.273056 | 2.176135  | 0.786726  |
| 32 | 1 | 0 | -1.799798 | 3.129770  | 0.593493  |
| 33 | 1 | 0 | -3.252230 | 3.552751  | -0.317396 |

---

## 1B

| Center<br>Number | Atomic<br>Number | Atomic<br>Type | Coordinates (Angstroms) |           |           |
|------------------|------------------|----------------|-------------------------|-----------|-----------|
|                  |                  |                | X                       | Y         | Z         |
| 1                | 6                | 0              | -1.411913               | 0.709680  | -0.856734 |
| 2                | 6                | 0              | -1.049939               | -0.091435 | -1.951613 |
| 3                | 6                | 0              | -1.458932               | 0.214568  | -3.239145 |
| 4                | 6                | 0              | -2.250279               | 1.338747  | -3.473037 |
| 5                | 6                | 0              | -2.626323               | 2.149213  | -2.409844 |
| 6                | 6                | 0              | -2.207710               | 1.829921  | -1.122500 |
| 7                | 1                | 0              | -0.440840               | -0.966737 | -1.752719 |
| 8                | 1                | 0              | -1.164230               | -0.424808 | -4.064624 |
| 9                | 1                | 0              | -3.240508               | 3.028437  | -2.567293 |
| 10               | 6                | 0              | -0.969040               | 0.368095  | 0.502063  |
| 11               | 7                | 0              | -0.167735               | -0.622634 | 0.669895  |
| 12               | 6                | 0              | -0.118851               | -0.177969 | 3.050368  |
| 13               | 1                | 0              | 0.078949                | 0.880835  | 2.845441  |
| 14               | 1                | 0              | -1.180767               | -0.290289 | 3.302511  |
| 15               | 7                | 0              | 0.247248                | -0.966190 | 1.893685  |
| 16               | 1                | 0              | 0.491139                | -0.478438 | 3.898488  |
| 17               | 1                | 0              | -2.576158               | 1.585604  | -4.477832 |
| 18               | 1                | 0              | -1.356666               | 0.972407  | 1.318133  |
| 19               | 6                | 0              | 1.110778                | -2.077260 | 1.977942  |
| 20               | 6                | 0              | 1.853536                | -2.476960 | 0.859321  |
| 21               | 6                | 0              | 1.231350                | -2.799054 | 3.170297  |

|    |    |   |           |           |           |
|----|----|---|-----------|-----------|-----------|
| 22 | 6  | 0 | 2.705243  | -3.569120 | 0.946882  |
| 23 | 1  | 0 | 1.754631  | -1.919195 | -0.063175 |
| 24 | 6  | 0 | 2.098650  | -3.884623 | 3.245110  |
| 25 | 1  | 0 | 0.629226  | -2.540534 | 4.034101  |
| 26 | 6  | 0 | 2.842052  | -4.278521 | 2.138574  |
| 27 | 1  | 0 | 3.278188  | -3.861598 | 0.072416  |
| 28 | 1  | 0 | 2.176739  | -4.432931 | 4.178641  |
| 29 | 1  | 0 | 3.513975  | -5.127471 | 2.200151  |
| 30 | 35 | 0 | -2.758715 | 2.988278  | 0.282268  |

---

### 1A-TS1

| Center<br>Number | Atomic<br>Number | Atomic<br>Type | Coordinates (Angstroms) |           |           |
|------------------|------------------|----------------|-------------------------|-----------|-----------|
|                  |                  |                | X                       | Y         | Z         |
| 1                | 6                | 0              | -0.822002               | -1.011318 | -2.224936 |
| 2                | 6                | 0              | 0.171852                | -1.849150 | -2.737980 |
| 3                | 6                | 0              | 0.276462                | -2.038727 | -4.113132 |
| 4                | 6                | 0              | -0.621569               | -1.411711 | -4.970677 |
| 5                | 6                | 0              | -1.639862               | -0.612089 | -4.451952 |
| 6                | 6                | 0              | -1.766907               | -0.407922 | -3.078756 |
| 7                | 1                | 0              | 0.853616                | -2.348026 | -2.053267 |
| 8                | 1                | 0              | 1.056643                | -2.684206 | -4.504061 |
| 9                | 1                | 0              | -2.352928               | -0.142084 | -5.124180 |
| 10               | 6                | 0              | -0.896066               | -0.785649 | -0.774288 |
| 11               | 7                | 0              | 0.162529                | -0.561040 | -0.079405 |
| 12               | 6                | 0              | -1.213538               | -0.553183 | 1.918435  |
| 13               | 1                | 0              | -1.935029               | 0.222227  | 1.634872  |
| 14               | 1                | 0              | -1.573726               | -1.553428 | 1.659271  |
| 15               | 7                | 0              | 0.062993                | -0.327310 | 1.260489  |
| 16               | 1                | 0              | -1.058020               | -0.521234 | 2.993080  |
| 17               | 1                | 0              | -0.546393               | -1.556420 | -6.044158 |
| 18               | 1                | 0              | -1.874924               | -0.813156 | -0.301896 |
| 19               | 6                | 0              | 1.271137                | -0.416819 | 1.969433  |
| 20               | 6                | 0              | 2.390260                | -0.991778 | 1.327671  |
| 21               | 6                | 0              | 1.376251                | 0.114431  | 3.260547  |
| 22               | 6                | 0              | 3.625597                | -0.959194 | 1.997676  |
| 23               | 6                | 0              | 2.608958                | 0.099878  | 3.900469  |
| 24               | 1                | 0              | 0.522524                | 0.571016  | 3.750236  |
| 25               | 6                | 0              | 3.745394                | -0.418264 | 3.271720  |
| 26               | 1                | 0              | 4.479961                | -1.399192 | 1.490393  |

|    |    |   |           |           |           |
|----|----|---|-----------|-----------|-----------|
| 27 | 1  | 0 | 2.687238  | 0.518250  | 4.899928  |
| 28 | 1  | 0 | 4.700815  | -0.417597 | 3.786344  |
| 29 | 45 | 0 | 2.286433  | 0.040304  | -0.755649 |
| 30 | 6  | 0 | 2.599975  | 2.114208  | -0.086019 |
| 31 | 6  | 0 | 3.831058  | 1.547436  | -0.609872 |
| 32 | 6  | 0 | 1.637446  | 2.089211  | -1.133036 |
| 33 | 6  | 0 | 3.617148  | 1.215764  | -1.985304 |
| 34 | 6  | 0 | 2.249289  | 1.513783  | -2.314997 |
| 35 | 6  | 0 | 2.410226  | 2.654985  | 1.293589  |
| 36 | 1  | 0 | 2.734033  | 3.700458  | 1.335363  |
| 37 | 1  | 0 | 1.361074  | 2.605824  | 1.593552  |
| 38 | 1  | 0 | 2.989710  | 2.081051  | 2.020699  |
| 39 | 6  | 0 | 5.120898  | 1.366033  | 0.122280  |
| 40 | 1  | 0 | 5.848714  | 2.110776  | -0.217710 |
| 41 | 1  | 0 | 4.980803  | 1.478107  | 1.198708  |
| 42 | 1  | 0 | 5.507779  | 0.361555  | -0.073353 |
| 43 | 6  | 0 | 4.632927  | 0.615134  | -2.899145 |
| 44 | 1  | 0 | 5.168952  | 1.411676  | -3.426294 |
| 45 | 1  | 0 | 5.340990  | 0.011791  | -2.328531 |
| 46 | 1  | 0 | 4.152254  | -0.032911 | -3.633620 |
| 47 | 6  | 0 | 1.607731  | 1.297009  | -3.648262 |
| 48 | 1  | 0 | 1.815076  | 2.139927  | -4.316354 |
| 49 | 1  | 0 | 1.990782  | 0.383439  | -4.107818 |
| 50 | 1  | 0 | 0.524901  | 1.179596  | -3.559661 |
| 51 | 6  | 0 | 0.209273  | 2.518857  | -1.030191 |
| 52 | 1  | 0 | -0.184493 | 2.329703  | -0.028215 |
| 53 | 1  | 0 | 0.120571  | 3.588704  | -1.244969 |
| 54 | 1  | 0 | -0.404176 | 1.971255  | -1.749466 |
| 55 | 8  | 0 | 1.710017  | -3.244024 | 0.050814  |
| 56 | 6  | 0 | 0.616822  | -3.710720 | 0.528289  |
| 57 | 8  | 0 | -0.130041 | -3.142422 | 1.335689  |
| 58 | 6  | 0 | 0.232487  | -5.087415 | -0.013003 |
| 59 | 1  | 0 | 0.022505  | -5.004383 | -1.083951 |
| 60 | 1  | 0 | 1.070836  | -5.778707 | 0.100929  |
| 61 | 1  | 0 | -0.647077 | -5.472614 | 0.502754  |
| 62 | 6  | 0 | 4.094516  | -3.643947 | -2.007796 |
| 63 | 1  | 0 | 5.098368  | -4.031278 | -1.837608 |
| 64 | 1  | 0 | 3.352364  | -4.243317 | -1.472574 |
| 65 | 1  | 0 | 3.847868  | -3.663145 | -3.071748 |
| 66 | 6  | 0 | 3.962762  | -2.239726 | -1.459986 |
| 67 | 8  | 0 | 4.818914  | -1.746525 | -0.721673 |
| 68 | 1  | 0 | 2.124465  | -1.950542 | 0.625998  |
| 69 | 8  | 0 | 2.872070  | -1.647196 | -1.833417 |
| 70 | 6  | 0 | -2.898921 | 0.426604  | -2.530721 |

|    |   |   |           |           |           |
|----|---|---|-----------|-----------|-----------|
| 71 | 1 | 0 | -3.620005 | -0.197107 | -1.990260 |
| 72 | 1 | 0 | -2.549201 | 1.191298  | -1.829272 |
| 73 | 1 | 0 | -3.436767 | 0.928258  | -3.337686 |

---

### 1B-TS1

| Center<br>Number | Atomic<br>Number | Atomic<br>Type | Coordinates (Angstroms) |           |           |
|------------------|------------------|----------------|-------------------------|-----------|-----------|
|                  |                  |                | X                       | Y         | Z         |
| 1                | 6                | 0              | -0.670714               | -1.127254 | -2.315459 |
| 2                | 6                | 0              | 0.199752                | -2.151364 | -2.702254 |
| 3                | 6                | 0              | 0.345723                | -2.471413 | -4.049230 |
| 4                | 6                | 0              | -0.389153               | -1.795186 | -5.018641 |
| 5                | 6                | 0              | -1.271872               | -0.780820 | -4.651627 |
| 6                | 6                | 0              | -1.398488               | -0.465778 | -3.307820 |
| 7                | 1                | 0              | 0.773100                | -2.662452 | -1.932774 |
| 8                | 1                | 0              | 1.033757                | -3.259541 | -4.336177 |
| 9                | 1                | 0              | -1.843787               | -0.234713 | -5.392834 |
| 10               | 6                | 0              | -0.849272               | -0.806855 | -0.887833 |
| 11               | 7                | 0              | 0.164771                | -0.546917 | -0.146105 |
| 12               | 6                | 0              | -1.296211               | -0.489508 | 1.782515  |
| 13               | 1                | 0              | -2.001596               | 0.268091  | 1.423246  |
| 14               | 1                | 0              | -1.641576               | -1.502195 | 1.551836  |
| 15               | 7                | 0              | 0.010890                | -0.284642 | 1.181826  |
| 16               | 1                | 0              | -1.198655               | -0.402651 | 2.861109  |
| 17               | 1                | 0              | -0.281211               | -2.051536 | -6.067754 |
| 18               | 1                | 0              | -1.859454               | -0.825445 | -0.487158 |
| 19               | 6                | 0              | 1.195724                | -0.396089 | 1.932862  |
| 20               | 6                | 0              | 2.329752                | -0.962537 | 1.307604  |
| 21               | 6                | 0              | 1.269483                | 0.102327  | 3.237819  |
| 22               | 6                | 0              | 3.548794                | -0.954031 | 2.006315  |
| 23               | 6                | 0              | 2.485240                | 0.054642  | 3.910465  |
| 24               | 1                | 0              | 0.407691                | 0.551243  | 3.720137  |
| 25               | 6                | 0              | 3.635899                | -0.454966 | 3.300503  |
| 26               | 1                | 0              | 4.413653                | -1.381808 | 1.504645  |
| 27               | 1                | 0              | 2.538607                | 0.442211  | 4.923838  |
| 28               | 1                | 0              | 4.575442                | -0.476659 | 3.843060  |
| 29               | 45               | 0              | 2.247970                | 0.106540  | -0.736522 |
| 30               | 6                | 0              | 2.690877                | 2.147904  | -0.002196 |
| 31               | 6                | 0              | 3.847617                | 1.559408  | -0.658014 |
| 32               | 6                | 0              | 1.636527                | 2.207019  | -0.949017 |

|    |    |   |           |           |           |
|----|----|---|-----------|-----------|-----------|
| 33 | 6  | 0 | 3.499315  | 1.309761  | -2.022686 |
| 34 | 6  | 0 | 2.119777  | 1.666497  | -2.209207 |
| 35 | 6  | 0 | 2.666392  | 2.624613  | 1.413355  |
| 36 | 1  | 0 | 3.171765  | 3.593645  | 1.486136  |
| 37 | 1  | 0 | 1.644664  | 2.741933  | 1.777648  |
| 38 | 1  | 0 | 3.177339  | 1.918532  | 2.073278  |
| 39 | 6  | 0 | 5.185807  | 1.323327  | -0.036156 |
| 40 | 1  | 0 | 5.876189  | 2.126388  | -0.316530 |
| 41 | 1  | 0 | 5.104815  | 1.297233  | 1.052575  |
| 42 | 1  | 0 | 5.581693  | 0.361273  | -0.367533 |
| 43 | 6  | 0 | 4.393406  | 0.703602  | -3.053131 |
| 44 | 1  | 0 | 4.934964  | 1.493736  | -3.584057 |
| 45 | 1  | 0 | 5.110168  | 0.030905  | -2.577858 |
| 46 | 1  | 0 | 3.811116  | 0.127394  | -3.774184 |
| 47 | 6  | 0 | 1.355419  | 1.541614  | -3.490589 |
| 48 | 1  | 0 | 1.730180  | 2.258884  | -4.228452 |
| 49 | 1  | 0 | 1.458134  | 0.532980  | -3.905269 |
| 50 | 1  | 0 | 0.290876  | 1.733519  | -3.340257 |
| 51 | 6  | 0 | 0.247533  | 2.694153  | -0.684592 |
| 52 | 1  | 0 | -0.021200 | 2.542568  | 0.363500  |
| 53 | 1  | 0 | 0.174390  | 3.763004  | -0.910979 |
| 54 | 1  | 0 | -0.486874 | 2.166755  | -1.296635 |
| 55 | 8  | 0 | 1.701336  | -3.231916 | 0.070446  |
| 56 | 6  | 0 | 0.628513  | -3.708812 | 0.591284  |
| 57 | 8  | 0 | -0.148685 | -3.102308 | 1.337103  |
| 58 | 6  | 0 | 0.322576  | -5.149214 | 0.185841  |
| 59 | 1  | 0 | 0.141465  | -5.190017 | -0.892926 |
| 60 | 1  | 0 | 1.187979  | -5.782765 | 0.393871  |
| 61 | 1  | 0 | -0.553678 | -5.519929 | 0.717297  |
| 62 | 6  | 0 | 3.957940  | -3.571457 | -2.127791 |
| 63 | 1  | 0 | 4.964773  | -3.970491 | -2.010013 |
| 64 | 1  | 0 | 3.236599  | -4.190692 | -1.586282 |
| 65 | 1  | 0 | 3.673569  | -3.547635 | -3.182373 |
| 66 | 6  | 0 | 3.858327  | -2.188354 | -1.519703 |
| 67 | 8  | 0 | 4.735659  | -1.739603 | -0.780869 |
| 68 | 1  | 0 | 2.078063  | -1.935251 | 0.598205  |
| 69 | 8  | 0 | 2.767893  | -1.566474 | -1.846579 |
| 70 | 35 | 0 | -2.523826 | 0.982704  | -2.815347 |

---

**1A-TS3**

---

| Center<br>Number | Atomic<br>Number | Atomic<br>Type | Coordinates (Angstroms) |           |           |
|------------------|------------------|----------------|-------------------------|-----------|-----------|
|                  |                  |                | X                       | Y         | Z         |
| 1                | 6                | 0              | -1.026669               | 0.175491  | -1.006020 |
| 2                | 6                | 0              | -1.726510               | 1.270673  | -0.469216 |
| 3                | 6                | 0              | -2.651885               | 1.993880  | -1.209350 |
| 4                | 6                | 0              | -2.910651               | 1.632945  | -2.527956 |
| 5                | 6                | 0              | -2.240035               | 0.543592  | -3.069239 |
| 6                | 6                | 0              | -1.301958               | -0.194518 | -2.339964 |
| 7                | 1                | 0              | -1.528365               | 1.544851  | 0.561125  |
| 8                | 1                | 0              | -3.165233               | 2.836793  | -0.756589 |
| 9                | 1                | 0              | -2.443840               | 0.247113  | -4.095283 |
| 10               | 6                | 0              | -0.009877               | -0.528643 | -0.153612 |
| 11               | 7                | 0              | -0.188312               | -0.272449 | 1.120869  |
| 12               | 6                | 0              | 0.071796                | -0.404288 | 3.419890  |
| 13               | 1                | 0              | -0.676424               | 0.376766  | 3.305578  |
| 14               | 1                | 0              | -0.401052               | -1.286454 | 3.866595  |
| 15               | 7                | 0              | 0.595415                | -0.688982 | 2.091529  |
| 16               | 1                | 0              | 0.877435                | -0.062780 | 4.074711  |
| 17               | 1                | 0              | -3.626385               | 2.188092  | -3.125893 |
| 18               | 1                | 0              | 0.309570                | -1.789771 | -0.414464 |
| 19               | 6                | 0              | 1.781503                | -1.452664 | 1.963318  |
| 20               | 6                | 0              | 2.556801                | -1.428227 | 0.794691  |
| 21               | 6                | 0              | 2.193709                | -2.217229 | 3.067291  |
| 22               | 6                | 0              | 3.719931                | -2.201784 | 0.767584  |
| 23               | 6                | 0              | 3.369727                | -2.952512 | 3.021806  |
| 24               | 1                | 0              | 1.581781                | -2.261444 | 3.960488  |
| 25               | 6                | 0              | 4.141271                | -2.949445 | 1.865191  |
| 26               | 1                | 0              | 4.304443                | -2.230818 | -0.148940 |
| 27               | 1                | 0              | 3.667815                | -3.538008 | 3.885382  |
| 28               | 1                | 0              | 5.058044                | -3.528608 | 1.811857  |
| 29               | 45               | 0              | 2.086547                | -0.419775 | -0.867912 |
| 30               | 6                | 0              | 2.333619                | 1.754372  | -0.681825 |
| 31               | 6                | 0              | 3.615284                | 1.149082  | -0.452361 |
| 32               | 6                | 0              | 2.007172                | 1.602658  | -2.098203 |
| 33               | 6                | 0              | 3.979241                | 0.463083  | -1.643014 |
| 34               | 6                | 0              | 2.982514                | 0.778140  | -2.663773 |
| 35               | 6                | 0              | 1.577386                | 2.605369  | 0.292066  |
| 36               | 1                | 0              | 1.941190                | 3.638874  | 0.274235  |
| 37               | 1                | 0              | 0.512809                | 2.612648  | 0.047136  |
| 38               | 1                | 0              | 1.683744                | 2.220278  | 1.309887  |
| 39               | 6                | 0              | 4.392775                | 1.207106  | 0.825646  |
| 40               | 1                | 0              | 5.032522                | 2.095896  | 0.839075  |
| 41               | 1                | 0              | 3.723702                | 1.253399  | 1.688137  |

|    |   |   |           |           |           |
|----|---|---|-----------|-----------|-----------|
| 42 | 1 | 0 | 5.023140  | 0.323891  | 0.949888  |
| 43 | 6 | 0 | 5.227362  | -0.321626 | -1.905683 |
| 44 | 1 | 0 | 5.911195  | 0.240303  | -2.551864 |
| 45 | 1 | 0 | 5.755256  | -0.548563 | -0.976970 |
| 46 | 1 | 0 | 4.994867  | -1.267775 | -2.404963 |
| 47 | 6 | 0 | 3.036055  | 0.234087  | -4.056981 |
| 48 | 1 | 0 | 3.907134  | 0.624589  | -4.594185 |
| 49 | 1 | 0 | 3.117170  | -0.857646 | -4.033052 |
| 50 | 1 | 0 | 2.140627  | 0.497809  | -4.622563 |
| 51 | 6 | 0 | 0.858257  | 2.251312  | -2.805918 |
| 52 | 1 | 0 | 0.007443  | 2.415362  | -2.141410 |
| 53 | 1 | 0 | 1.170038  | 3.223899  | -3.203625 |
| 54 | 1 | 0 | 0.504903  | 1.640897  | -3.639942 |
| 55 | 8 | 0 | 2.197107  | -2.375011 | -1.802557 |
| 56 | 6 | 0 | 1.440727  | -3.287874 | -1.369051 |
| 57 | 8 | 0 | 0.456896  | -3.090113 | -0.599459 |
| 58 | 6 | 0 | 1.753733  | -4.711151 | -1.761640 |
| 59 | 1 | 0 | 0.846114  | -5.313568 | -1.765578 |
| 60 | 1 | 0 | 2.248998  | -4.737294 | -2.731999 |
| 61 | 1 | 0 | 2.438209  | -5.116810 | -1.010322 |
| 62 | 6 | 0 | -0.627198 | -1.357104 | -3.021218 |
| 63 | 1 | 0 | 0.459292  | -1.229270 | -3.066997 |
| 64 | 1 | 0 | -0.818446 | -2.292864 | -2.489450 |
| 65 | 1 | 0 | -1.000741 | -1.463010 | -4.042622 |

### 1B-TS3

| Center<br>Number | Atomic<br>Number | Atomic<br>Type | Coordinates (Angstroms) |           |           |
|------------------|------------------|----------------|-------------------------|-----------|-----------|
|                  |                  |                | X                       | Y         | Z         |
| 1                | 6                | 0              | -1.070784               | 0.170171  | -1.004161 |
| 2                | 6                | 0              | -1.846054               | 1.194942  | -0.421655 |
| 3                | 6                | 0              | -2.803769               | 1.908463  | -1.124052 |
| 4                | 6                | 0              | -3.043286               | 1.619492  | -2.466028 |
| 5                | 6                | 0              | -2.303146               | 0.619416  | -3.076989 |
| 6                | 6                | 0              | -1.332532               | -0.079290 | -2.358623 |
| 7                | 1                | 0              | -1.669433               | 1.414904  | 0.624486  |
| 8                | 1                | 0              | -3.364366               | 2.690920  | -0.622436 |
| 9                | 1                | 0              | -2.458640               | 0.374746  | -4.121564 |
| 10               | 6                | 0              | -0.039344               | -0.537756 | -0.174944 |
| 11               | 7                | 0              | -0.186437               | -0.250118 | 1.096822  |



|    |    |   |           |           |           |
|----|----|---|-----------|-----------|-----------|
| 12 | 6  | 0 | 0.109093  | -0.320680 | 3.394004  |
| 13 | 1  | 0 | -0.609765 | 0.486651  | 3.271683  |
| 14 | 1  | 0 | -0.388945 | -1.167615 | 3.879155  |
| 15 | 7  | 0 | 0.591790  | -0.669576 | 2.064836  |
| 16 | 1  | 0 | 0.943099  | 0.007037  | 4.019600  |
| 17 | 1  | 0 | -3.791030 | 2.165174  | -3.031514 |
| 18 | 1  | 0 | 0.284650  | -1.771004 | -0.458114 |
| 19 | 6  | 0 | 1.766784  | -1.454147 | 1.941734  |
| 20 | 6  | 0 | 2.549585  | -1.437868 | 0.778826  |
| 21 | 6  | 0 | 2.161957  | -2.219212 | 3.050840  |
| 22 | 6  | 0 | 3.709233  | -2.216623 | 0.764066  |
| 23 | 6  | 0 | 3.333806  | -2.961662 | 3.017646  |
| 24 | 1  | 0 | 1.540066  | -2.256329 | 3.937754  |
| 25 | 6  | 0 | 4.116193  | -2.962699 | 1.867985  |
| 26 | 1  | 0 | 4.298961  | -2.253591 | -0.148412 |
| 27 | 1  | 0 | 3.620999  | -3.547992 | 3.884247  |
| 28 | 1  | 0 | 5.030200  | -3.546941 | 1.824292  |
| 29 | 45 | 0 | 2.082958  | -0.436455 | -0.889341 |
| 30 | 6  | 0 | 2.318666  | 1.741196  | -0.701614 |
| 31 | 6  | 0 | 3.597334  | 1.137560  | -0.471375 |
| 32 | 6  | 0 | 1.993158  | 1.590100  | -2.120016 |
| 33 | 6  | 0 | 3.956289  | 0.443113  | -1.662447 |
| 34 | 6  | 0 | 2.966073  | 0.767686  | -2.688507 |
| 35 | 6  | 0 | 1.553744  | 2.584903  | 0.272526  |
| 36 | 1  | 0 | 1.901696  | 3.623797  | 0.251330  |
| 37 | 1  | 0 | 0.487233  | 2.576862  | 0.033429  |
| 38 | 1  | 0 | 1.669313  | 2.203771  | 1.290831  |
| 39 | 6  | 0 | 4.377783  | 1.197084  | 0.804588  |
| 40 | 1  | 0 | 5.020648  | 2.083700  | 0.813124  |
| 41 | 1  | 0 | 3.711223  | 1.248664  | 1.668855  |
| 42 | 1  | 0 | 5.005452  | 0.312264  | 0.930551  |
| 43 | 6  | 0 | 5.200845  | -0.346767 | -1.924810 |
| 44 | 1  | 0 | 5.883436  | 0.209690  | -2.576913 |
| 45 | 1  | 0 | 5.731560  | -0.570681 | -0.996992 |
| 46 | 1  | 0 | 4.960334  | -1.294135 | -2.417836 |
| 47 | 6  | 0 | 3.011977  | 0.212441  | -4.076935 |
| 48 | 1  | 0 | 3.901722  | 0.565269  | -4.609591 |
| 49 | 1  | 0 | 3.048374  | -0.881718 | -4.039158 |
| 50 | 1  | 0 | 2.128135  | 0.498322  | -4.648837 |
| 51 | 6  | 0 | 0.844393  | 2.246958  | -2.820793 |
| 52 | 1  | 0 | -0.009772 | 2.396179  | -2.155868 |
| 53 | 1  | 0 | 1.153600  | 3.230104  | -3.193656 |
| 54 | 1  | 0 | 0.502394  | 1.652732  | -3.671382 |
| 55 | 8  | 0 | 2.234674  | -2.390234 | -1.788150 |

|    |    |   |           |           |           |
|----|----|---|-----------|-----------|-----------|
| 56 | 6  | 0 | 1.430648  | -3.288799 | -1.406884 |
| 57 | 8  | 0 | 0.441153  | -3.088445 | -0.651653 |
| 58 | 6  | 0 | 1.694561  | -4.705037 | -1.860620 |
| 59 | 1  | 0 | 0.750759  | -5.225218 | -2.023797 |
| 60 | 1  | 0 | 2.306646  | -4.710677 | -2.761804 |
| 61 | 1  | 0 | 2.235999  | -5.218665 | -1.060664 |
| 62 | 35 | 0 | -0.338410 | -1.342664 | -3.368074 |

---

## 1A-TS4

| Center<br>Number | Atomic<br>Number | Atomic<br>Type | Coordinates (Angstroms) |           |           |
|------------------|------------------|----------------|-------------------------|-----------|-----------|
|                  |                  |                | X                       | Y         | Z         |
| 1                | 6                | 0              | -0.198450               | -1.526452 | -0.975372 |
| 2                | 6                | 0              | -1.105653               | -0.694998 | -1.691461 |
| 3                | 6                | 0              | -1.296322               | -0.856468 | -3.042128 |
| 4                | 6                | 0              | -0.548848               | -1.824516 | -3.743666 |
| 5                | 6                | 0              | 0.316427                | -2.650237 | -3.061241 |
| 6                | 6                | 0              | 0.497298                | -2.558601 | -1.659332 |
| 7                | 1                | 0              | -1.625508               | 0.079391  | -1.135369 |
| 8                | 1                | 0              | -1.999241               | -0.221763 | -3.572617 |
| 9                | 1                | 0              | 0.849908                | -3.433770 | -3.594170 |
| 10               | 6                | 0              | 0.246732                | -1.094131 | 0.346488  |
| 11               | 7                | 0              | -0.436243               | -0.645675 | 1.332060  |
| 12               | 6                | 0              | -0.329920               | 0.148007  | 3.565805  |
| 13               | 1                | 0              | -1.329135               | 0.481323  | 3.291954  |
| 14               | 1                | 0              | -0.403922               | -0.717435 | 4.236967  |
| 15               | 7                | 0              | 0.367242                | -0.183172 | 2.338946  |
| 16               | 1                | 0              | 0.187738                | 0.959211  | 4.082869  |
| 17               | 1                | 0              | -0.675703               | -1.936434 | -4.815967 |
| 18               | 6                | 0              | 1.623462                | -0.767941 | 2.365599  |
| 19               | 6                | 0              | 2.041851                | -1.384197 | 1.166036  |
| 20               | 6                | 0              | 2.388464                | -0.855133 | 3.542458  |
| 21               | 6                | 0              | 3.177110                | -2.216834 | 1.236231  |
| 22               | 6                | 0              | 3.540386                | -1.619755 | 3.546900  |
| 23               | 1                | 0              | 2.066256                | -0.348757 | 4.446056  |
| 24               | 6                | 0              | 3.925414                | -2.325985 | 2.398811  |
| 25               | 1                | 0              | 3.508069                | -2.740056 | 0.343243  |
| 26               | 1                | 0              | 4.129578                | -1.693960 | 4.455448  |
| 27               | 1                | 0              | 4.817784                | -2.943894 | 2.411828  |
| 28               | 45               | 0              | 1.830666                | -0.482041 | -0.718394 |

|    |   |   |          |           |           |
|----|---|---|----------|-----------|-----------|
| 29 | 6 | 0 | 3.178808 | 1.187537  | -0.224235 |
| 30 | 6 | 0 | 3.889930 | 0.437158  | -1.230520 |
| 31 | 6 | 0 | 2.063506 | 1.877019  | -0.854882 |
| 32 | 6 | 0 | 3.095715 | 0.487105  | -2.391597 |
| 33 | 6 | 0 | 1.989696 | 1.421577  | -2.171818 |
| 34 | 6 | 0 | 3.683263 | 1.467038  | 1.158934  |
| 35 | 1 | 0 | 4.418102 | 2.280552  | 1.137251  |
| 36 | 1 | 0 | 2.866247 | 1.765735  | 1.821139  |
| 37 | 1 | 0 | 4.160441 | 0.585225  | 1.596648  |
| 38 | 6 | 0 | 5.188281 | -0.280131 | -1.020897 |
| 39 | 1 | 0 | 6.039727 | 0.405583  | -1.104451 |
| 40 | 1 | 0 | 5.228370 | -0.738179 | -0.027607 |
| 41 | 1 | 0 | 5.328495 | -1.073830 | -1.759579 |
| 42 | 6 | 0 | 3.349565 | -0.192568 | -3.702897 |
| 43 | 1 | 0 | 3.727580 | 0.517866  | -4.447232 |
| 44 | 1 | 0 | 4.082873 | -0.995460 | -3.599502 |
| 45 | 1 | 0 | 2.426414 | -0.627858 | -4.100790 |
| 46 | 6 | 0 | 0.988449 | 1.785367  | -3.223421 |
| 47 | 1 | 0 | 1.415884 | 2.480434  | -3.955398 |
| 48 | 1 | 0 | 0.651257 | 0.896704  | -3.766371 |
| 49 | 1 | 0 | 0.103015 | 2.255348  | -2.788251 |
| 50 | 6 | 0 | 1.143278 | 2.822118  | -0.143445 |
| 51 | 1 | 0 | 0.776353 | 2.381911  | 0.789337  |
| 52 | 1 | 0 | 1.651433 | 3.760608  | 0.105976  |
| 53 | 1 | 0 | 0.274919 | 3.066783  | -0.759217 |
| 54 | 6 | 0 | 1.181450 | -3.713865 | -0.964765 |
| 55 | 1 | 0 | 2.206570 | -3.846459 | -1.323434 |
| 56 | 1 | 0 | 1.205159 | -3.583935 | 0.115752  |
| 57 | 1 | 0 | 0.633821 | -4.636504 | -1.186002 |

#### 1B-TS4

| Center<br>Number | Atomic<br>Number | Atomic<br>Type | Coordinates (Angstroms) |           |           |
|------------------|------------------|----------------|-------------------------|-----------|-----------|
|                  |                  |                | X                       | Y         | Z         |
| 1                | 6                | 0              | -0.221115               | -1.521679 | -0.994161 |
| 2                | 6                | 0              | -1.142680               | -0.693073 | -1.695051 |
| 3                | 6                | 0              | -1.341168               | -0.831217 | -3.047627 |
| 4                | 6                | 0              | -0.595371               | -1.778052 | -3.778513 |
| 5                | 6                | 0              | 0.284654                | -2.614926 | -3.128109 |
| 6                | 6                | 0              | 0.466866                | -2.511664 | -1.734210 |

|    |    |   |           |           |           |
|----|----|---|-----------|-----------|-----------|
| 7  | 1  | 0 | -1.669749 | 0.060608  | -1.118138 |
| 8  | 1  | 0 | -2.056943 | -0.194292 | -3.557338 |
| 9  | 1  | 0 | 0.822188  | -3.386911 | -3.667182 |
| 10 | 6  | 0 | 0.230568  | -1.124212 | 0.333232  |
| 11 | 7  | 0 | -0.461194 | -0.698085 | 1.319995  |
| 12 | 6  | 0 | -0.384612 | 0.057944  | 3.565127  |
| 13 | 1  | 0 | -1.391102 | 0.368857  | 3.291712  |
| 14 | 1  | 0 | -0.438318 | -0.818730 | 4.223165  |
| 15 | 7  | 0 | 0.325940  | -0.237892 | 2.336350  |
| 16 | 1  | 0 | 0.110091  | 0.874865  | 4.095314  |
| 17 | 1  | 0 | -0.732818 | -1.871222 | -4.850833 |
| 18 | 6  | 0 | 1.597321  | -0.795035 | 2.361082  |
| 19 | 6  | 0 | 2.041744  | -1.389440 | 1.162166  |
| 20 | 6  | 0 | 2.354178  | -0.873995 | 3.544530  |
| 21 | 6  | 0 | 3.202242  | -2.185305 | 1.230758  |
| 22 | 6  | 0 | 3.527868  | -1.603717 | 3.551690  |
| 23 | 1  | 0 | 2.008251  | -0.388966 | 4.450871  |
| 24 | 6  | 0 | 3.943781  | -2.282506 | 2.398212  |
| 25 | 1  | 0 | 3.555510  | -2.687330 | 0.335993  |
| 26 | 1  | 0 | 4.110791  | -1.671059 | 4.464795  |
| 27 | 1  | 0 | 4.855236  | -2.872046 | 2.410417  |
| 28 | 45 | 0 | 1.816819  | -0.507945 | -0.733685 |
| 29 | 6  | 0 | 3.198914  | 1.140020  | -0.249743 |
| 30 | 6  | 0 | 3.880142  | 0.371994  | -1.260224 |
| 31 | 6  | 0 | 2.086928  | 1.849559  | -0.869992 |
| 32 | 6  | 0 | 3.068106  | 0.433002  | -2.411296 |
| 33 | 6  | 0 | 1.990797  | 1.398813  | -2.186246 |
| 34 | 6  | 0 | 3.717960  | 1.414127  | 1.128901  |
| 35 | 1  | 0 | 4.473371  | 2.208092  | 1.096241  |
| 36 | 1  | 0 | 2.913270  | 1.739471  | 1.793277  |
| 37 | 1  | 0 | 4.173657  | 0.523339  | 1.570699  |
| 38 | 6  | 0 | 5.157476  | -0.387658 | -1.070485 |
| 39 | 1  | 0 | 6.031311  | 0.236901  | -1.289263 |
| 40 | 1  | 0 | 5.249718  | -0.741661 | -0.039523 |
| 41 | 1  | 0 | 5.201224  | -1.263307 | -1.724410 |
| 42 | 6  | 0 | 3.290913  | -0.272073 | -3.714849 |
| 43 | 1  | 0 | 3.709307  | 0.409271  | -4.464546 |
| 44 | 1  | 0 | 3.979625  | -1.112004 | -3.598117 |
| 45 | 1  | 0 | 2.348174  | -0.662883 | -4.112878 |
| 46 | 6  | 0 | 0.987132  | 1.787301  | -3.226665 |
| 47 | 1  | 0 | 1.417814  | 2.486888  | -3.952319 |
| 48 | 1  | 0 | 0.636963  | 0.910301  | -3.780099 |
| 49 | 1  | 0 | 0.109977  | 2.262070  | -2.779941 |
| 50 | 6  | 0 | 1.200176  | 2.819649  | -0.149970 |

|    |    |   |          |           |           |
|----|----|---|----------|-----------|-----------|
| 51 | 1  | 0 | 0.826106 | 2.388605  | 0.784121  |
| 52 | 1  | 0 | 1.739448 | 3.740704  | 0.098995  |
| 53 | 1  | 0 | 0.336378 | 3.093803  | -0.759636 |
| 54 | 35 | 0 | 1.340685 | -3.971732 | -0.891828 |

---

## 8. Copies of NMR spectra

### NMR spectra of **1a**

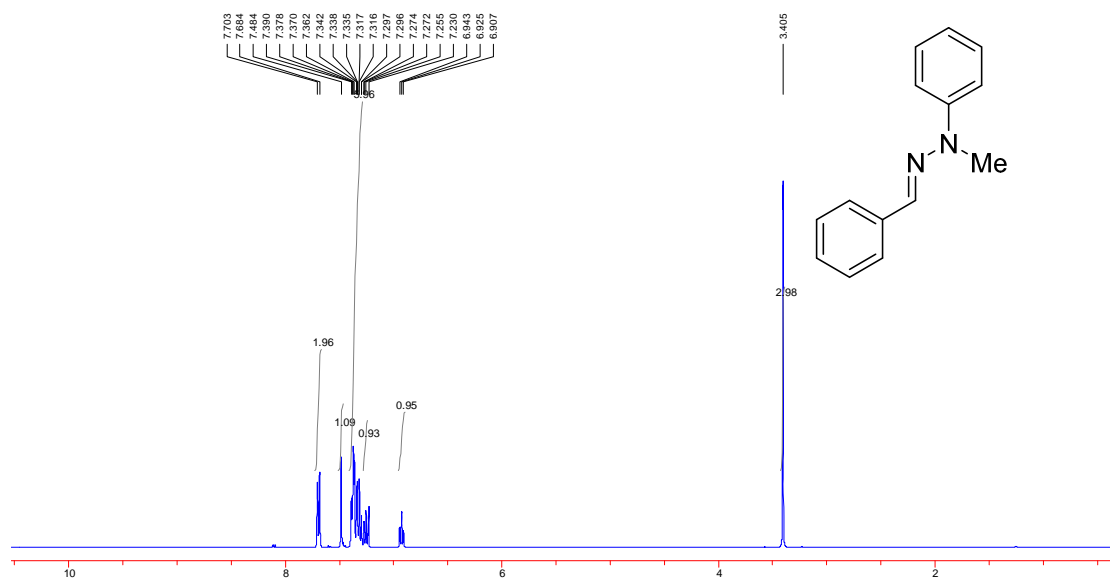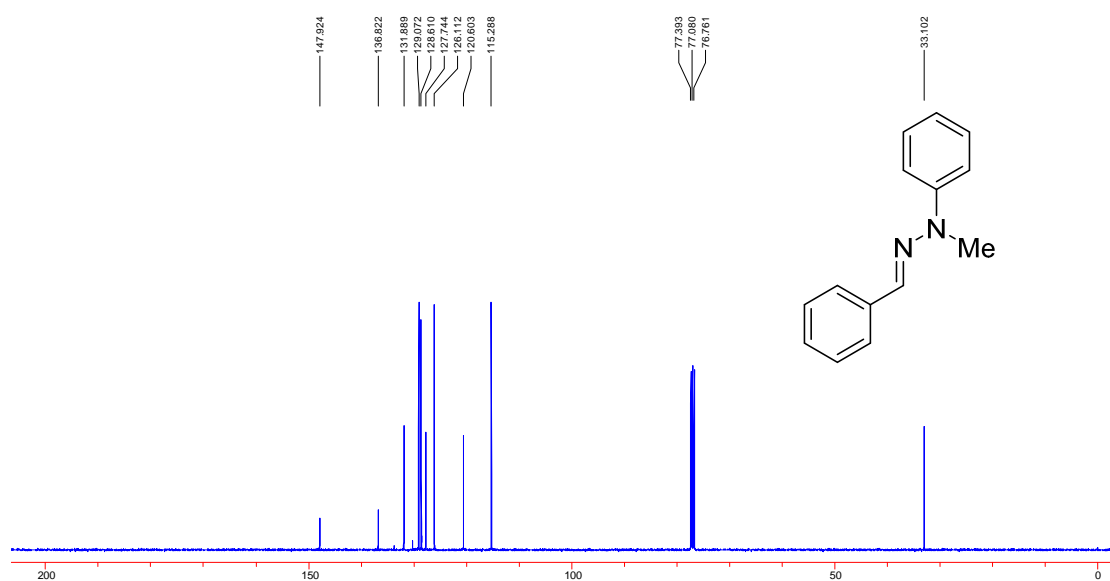

# NMR spectra of **1b**

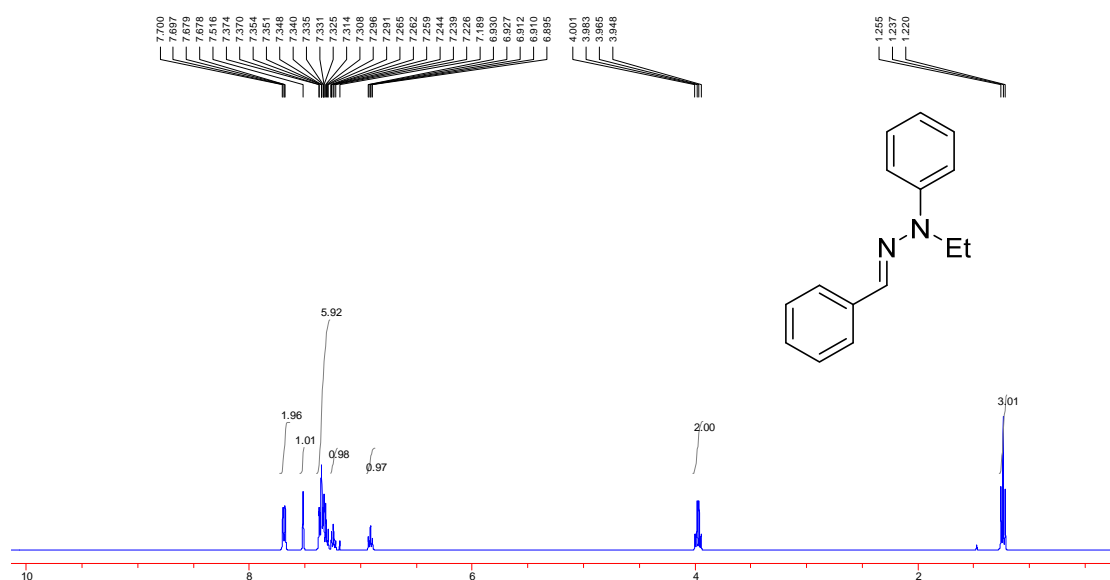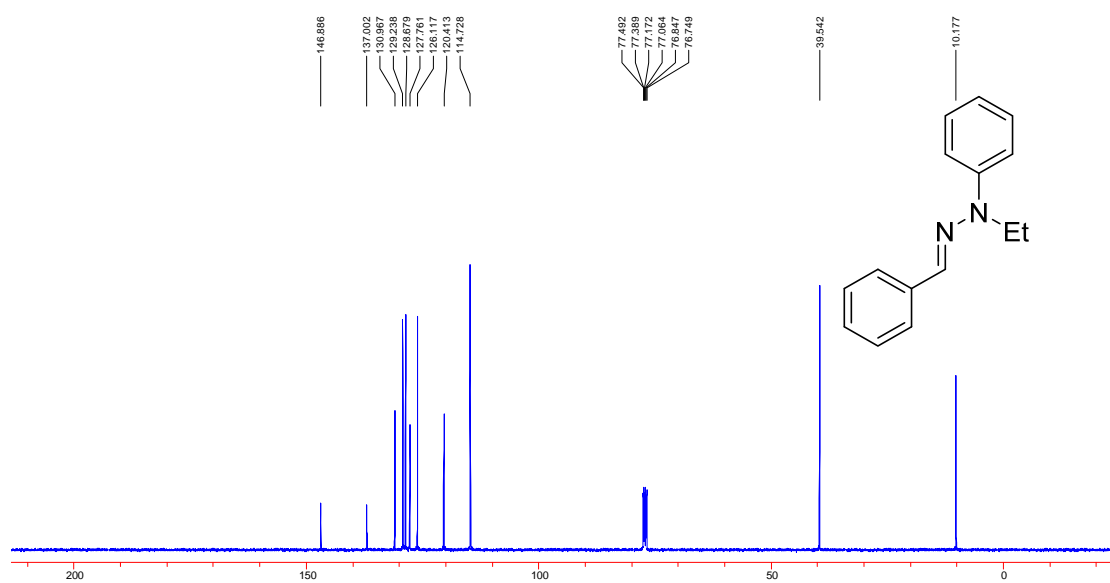

# NMR spectra of **1c**

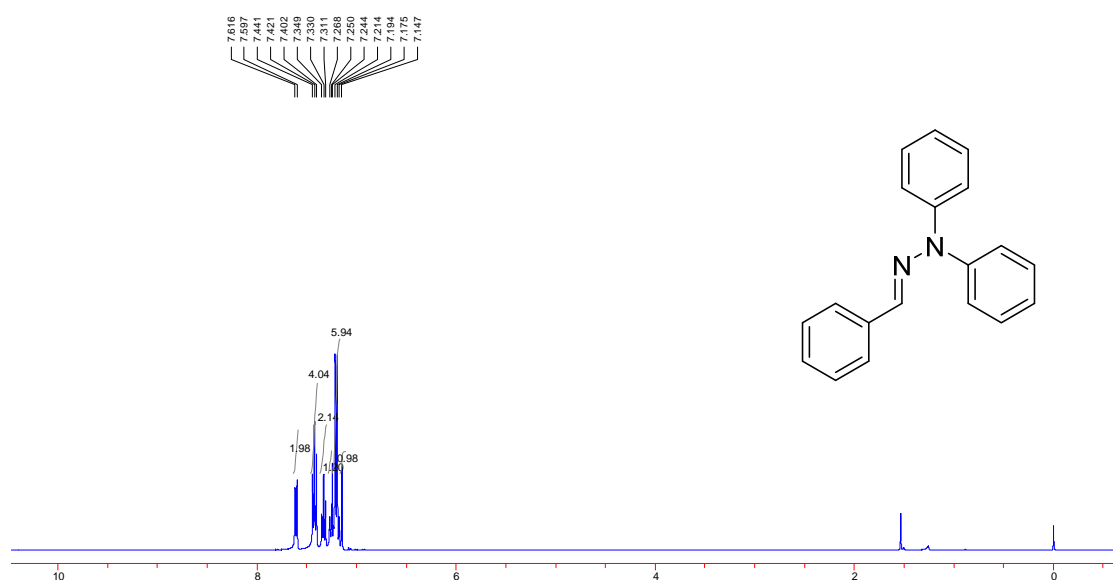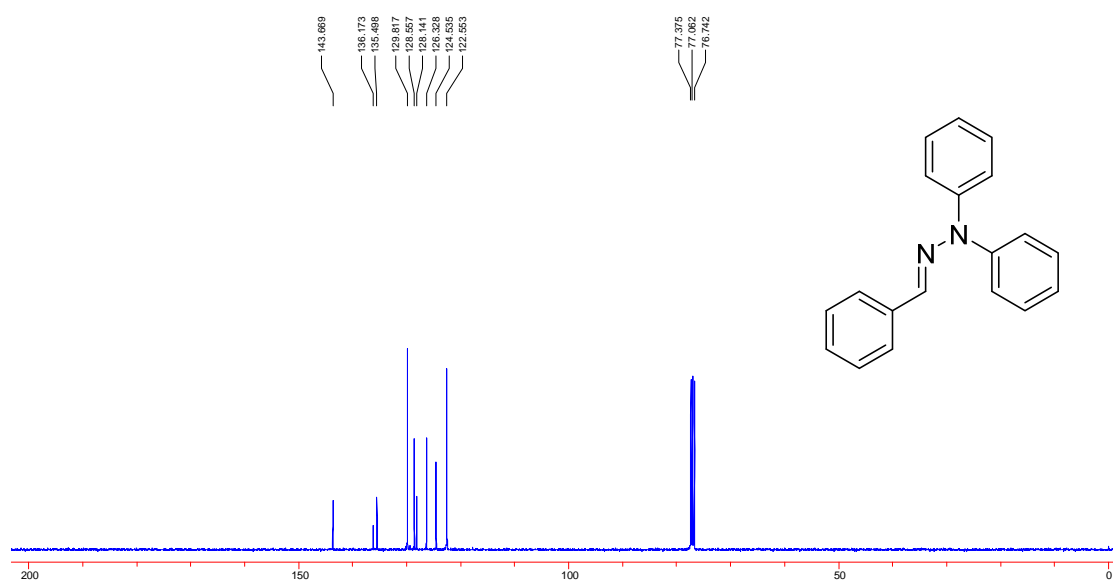



# NMR spectra of **1d**

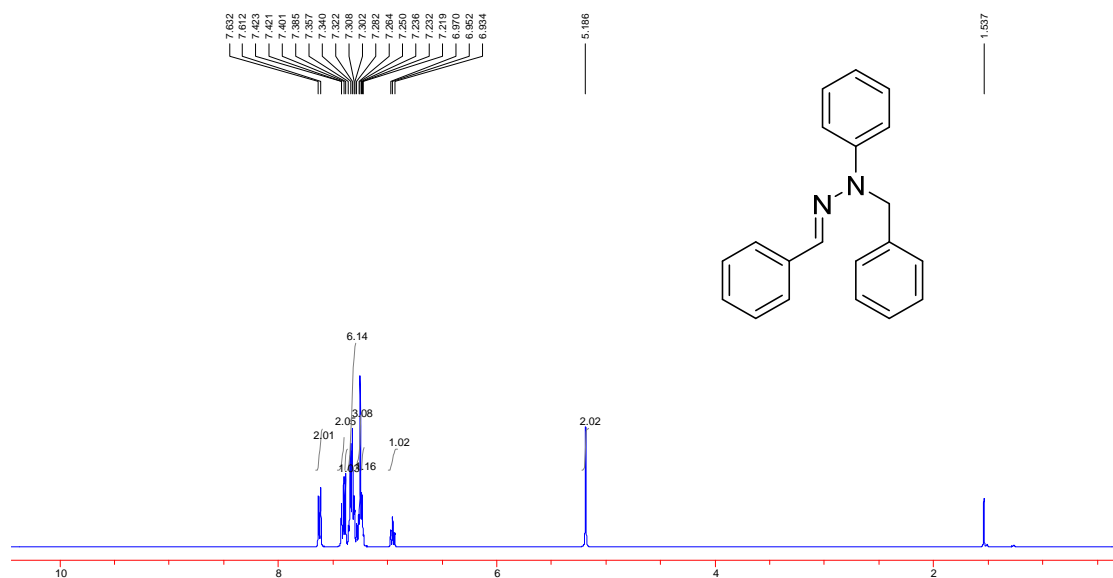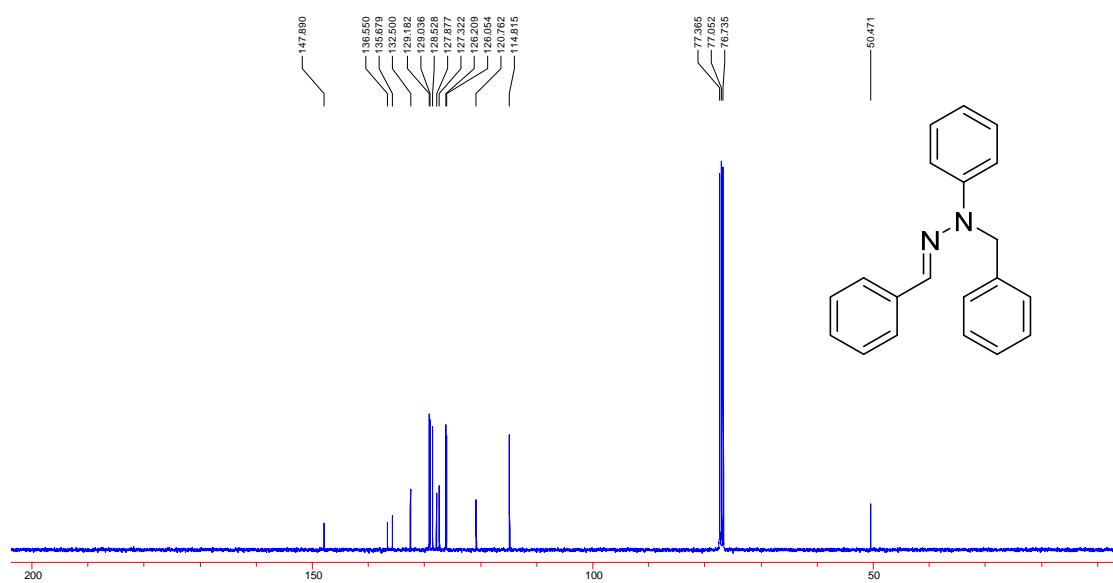

# NMR spectra of **1e**

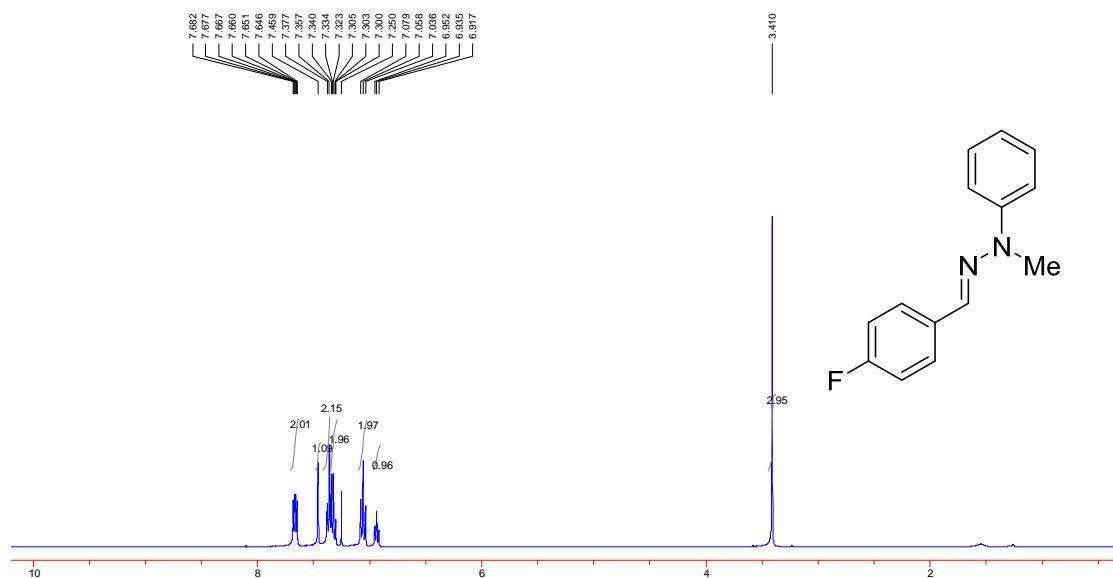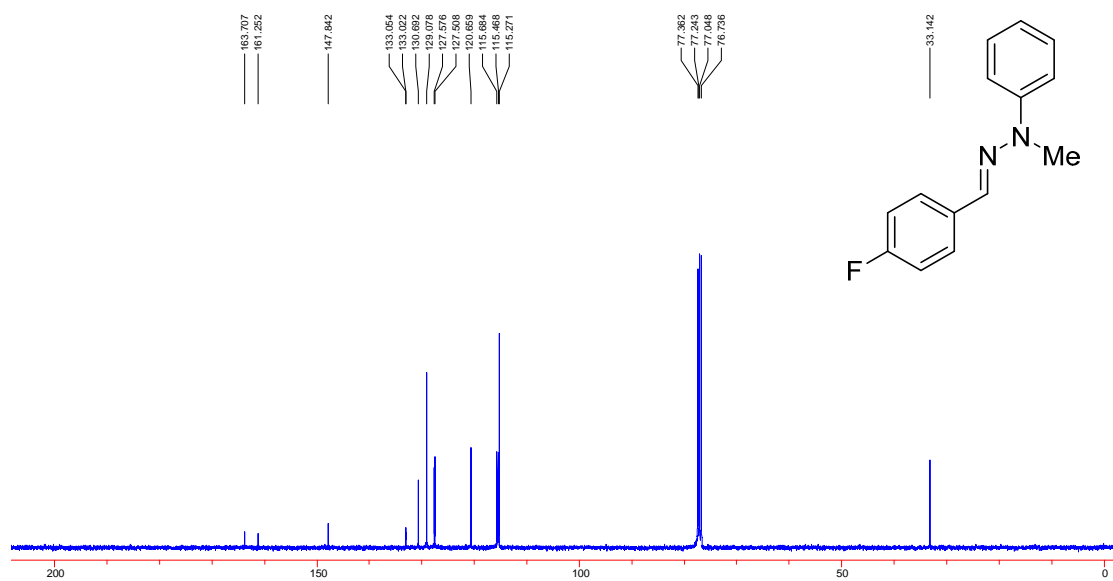

# NMR spectra of **1f**

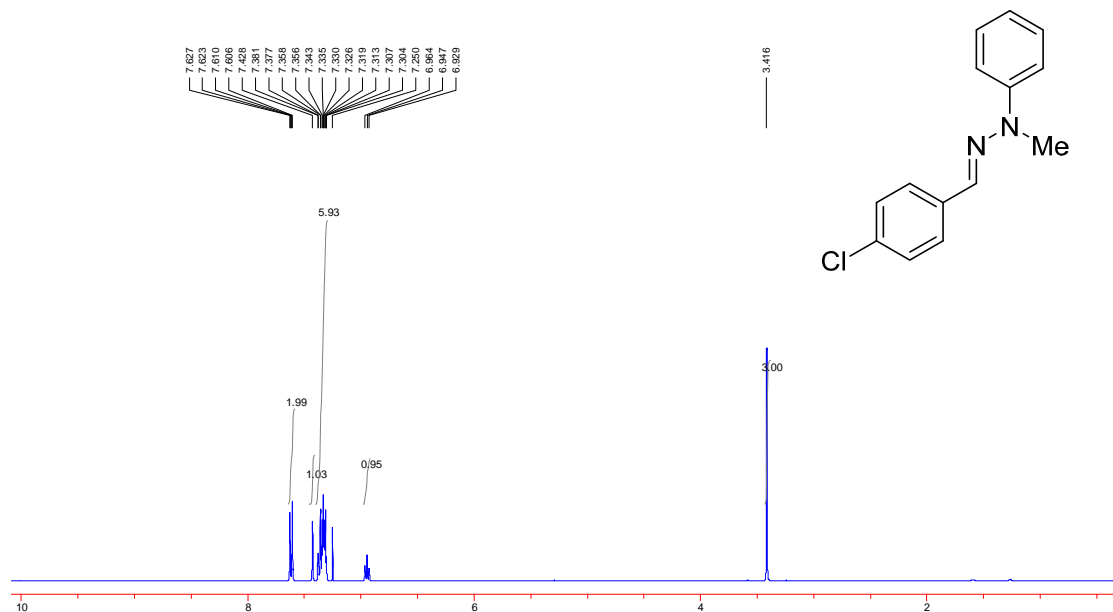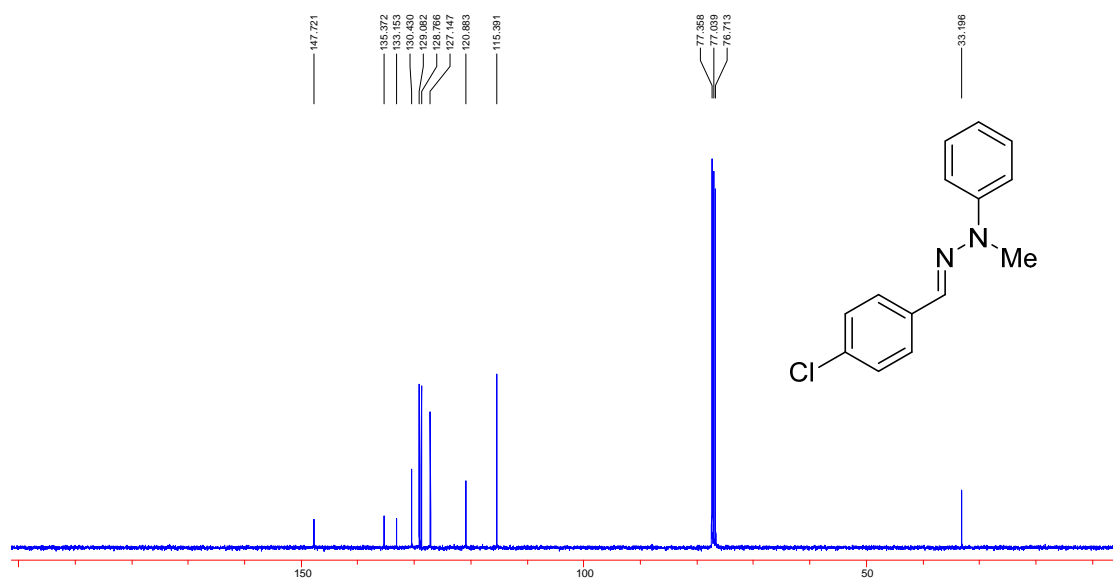

# NMR spectra of **1g**

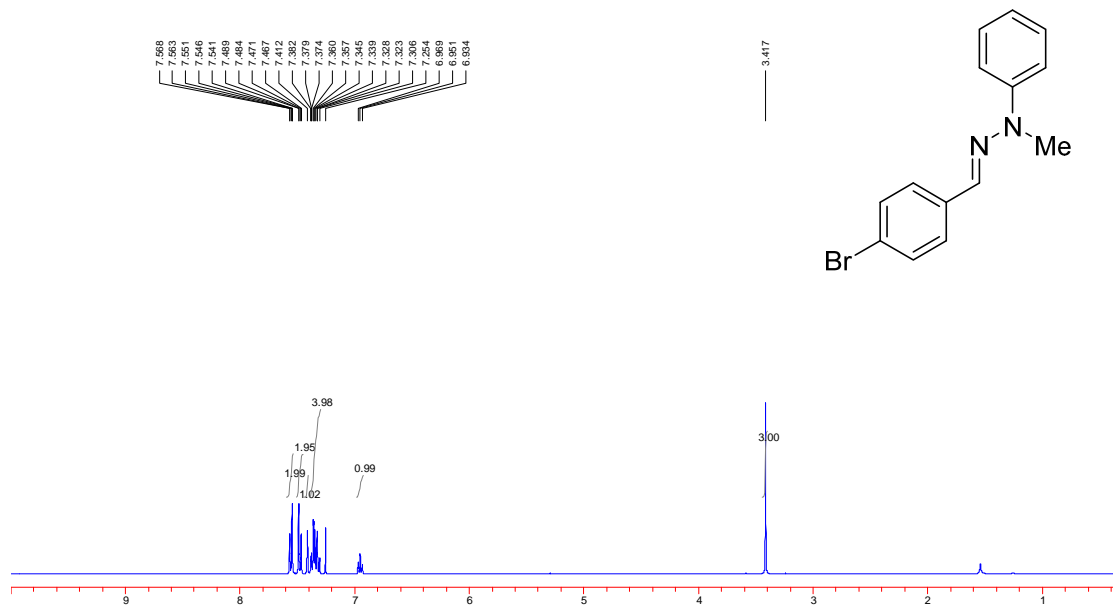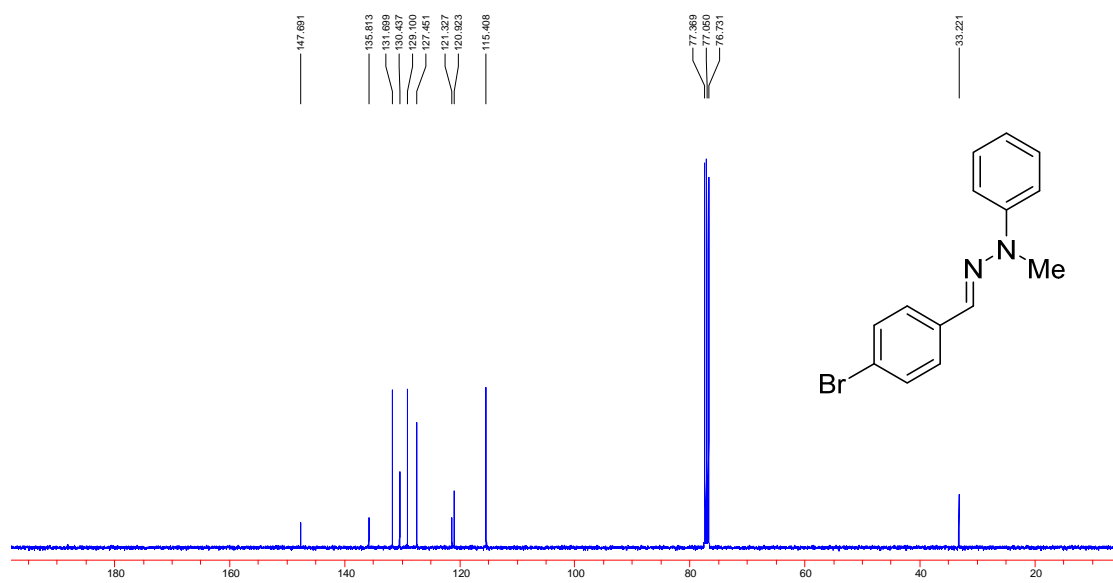

# NMR spectra of **1h**

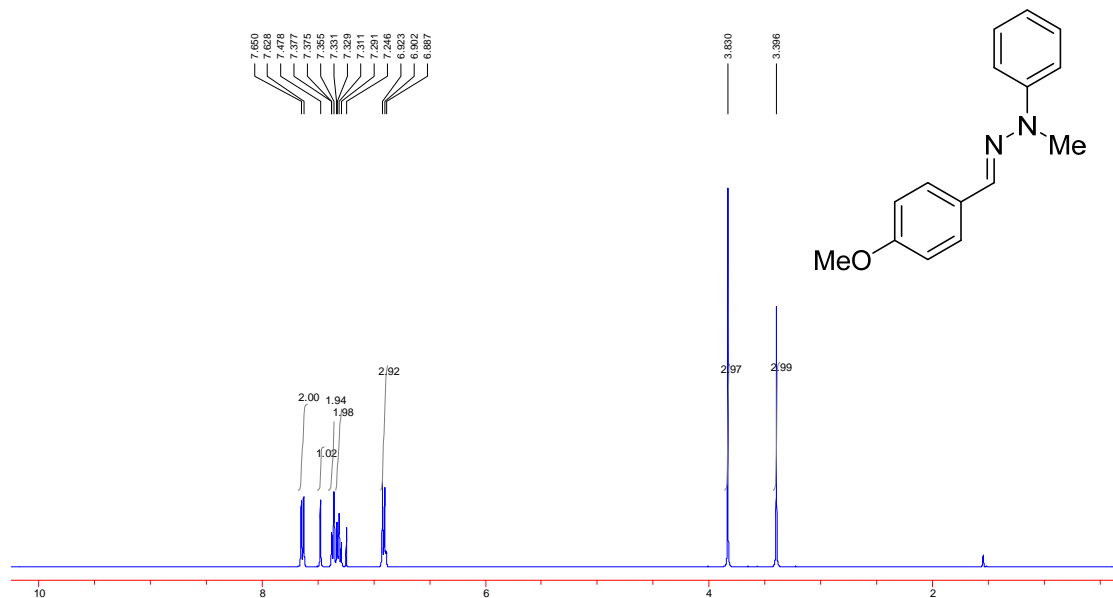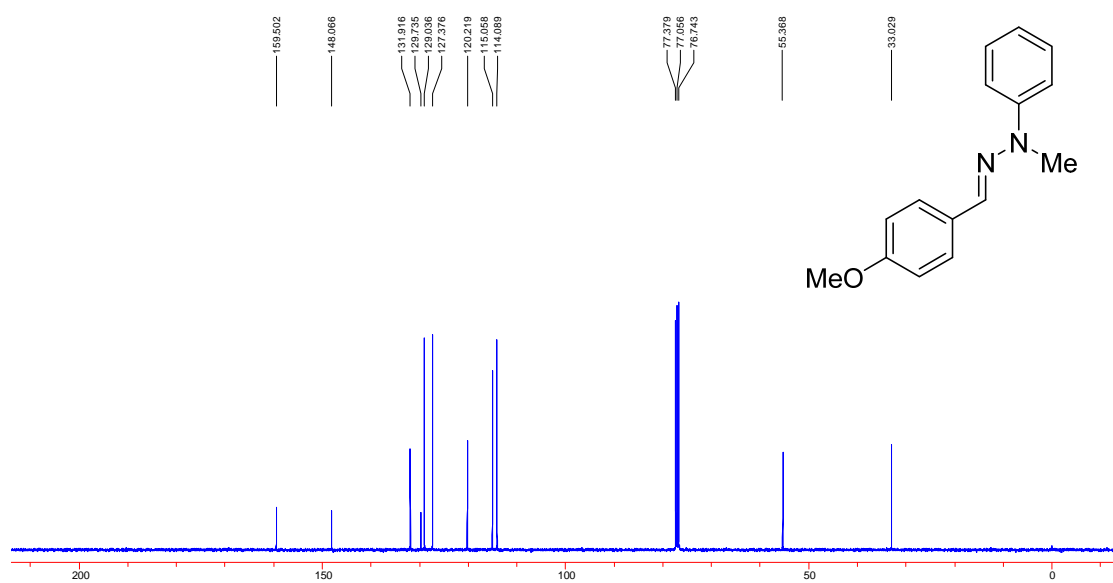

# NMR spectra of **1i**

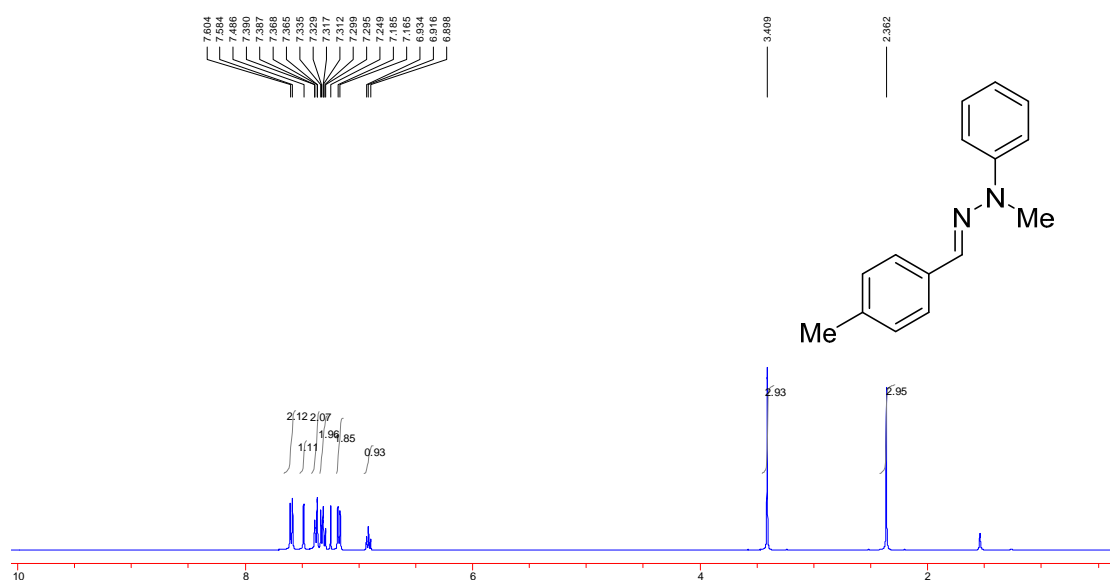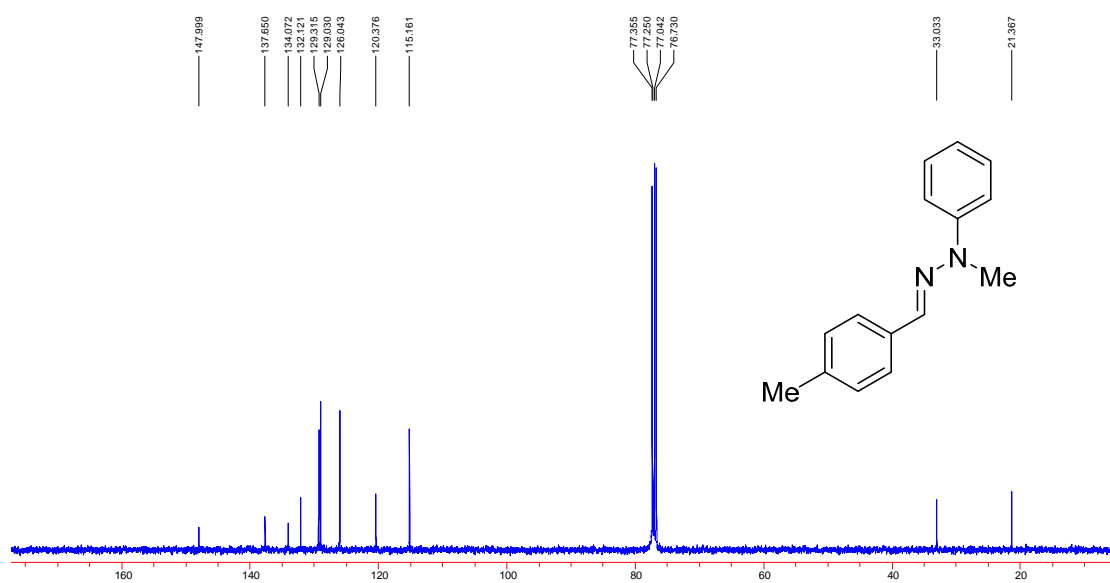

# NMR spectra of **1j**

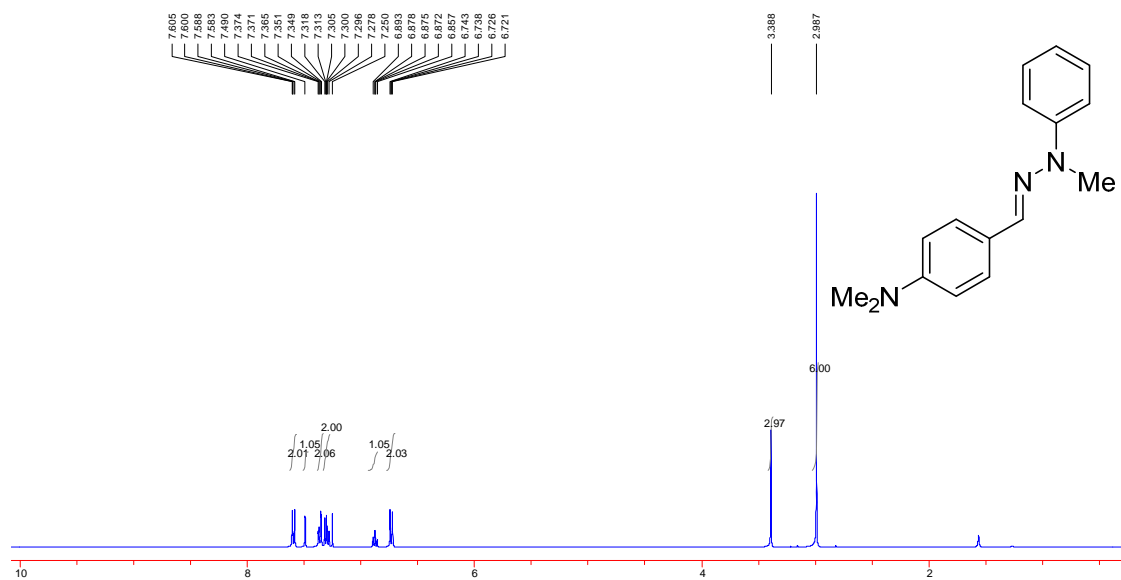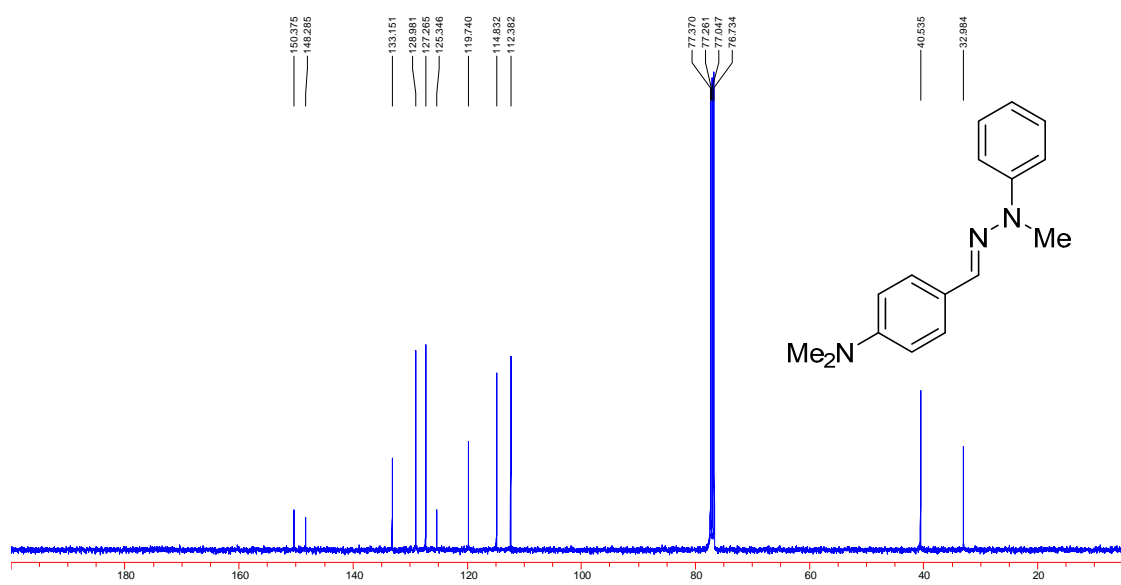

# NMR spectra of **1k**

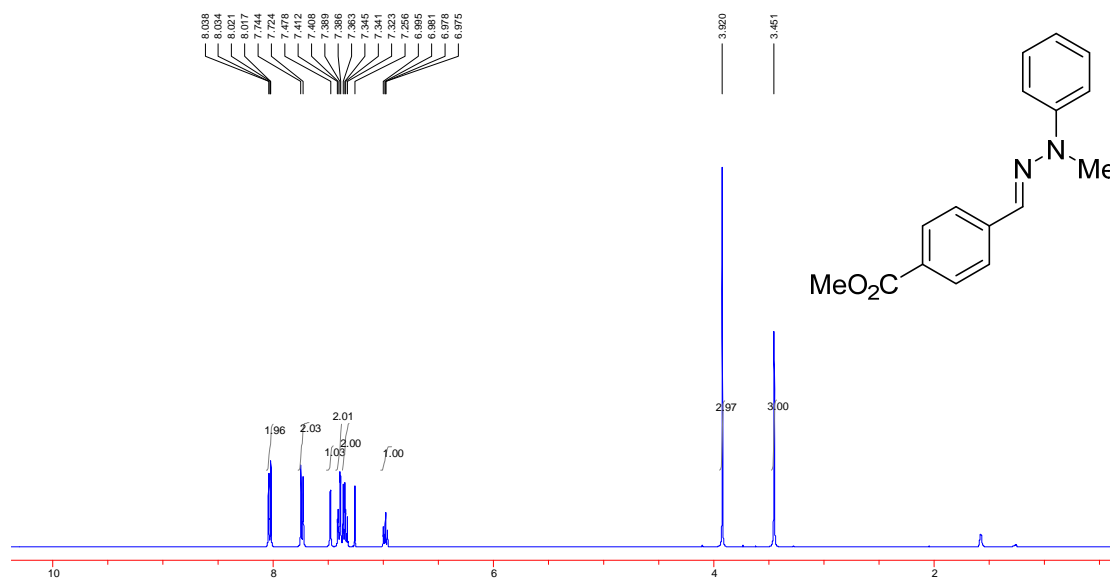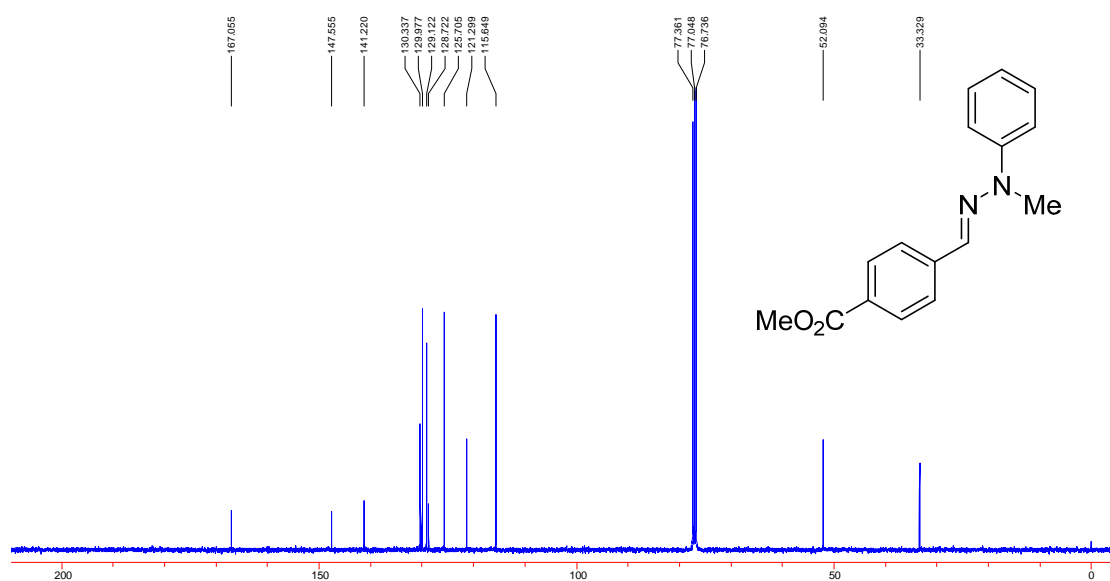



# NMR spectra of **11**

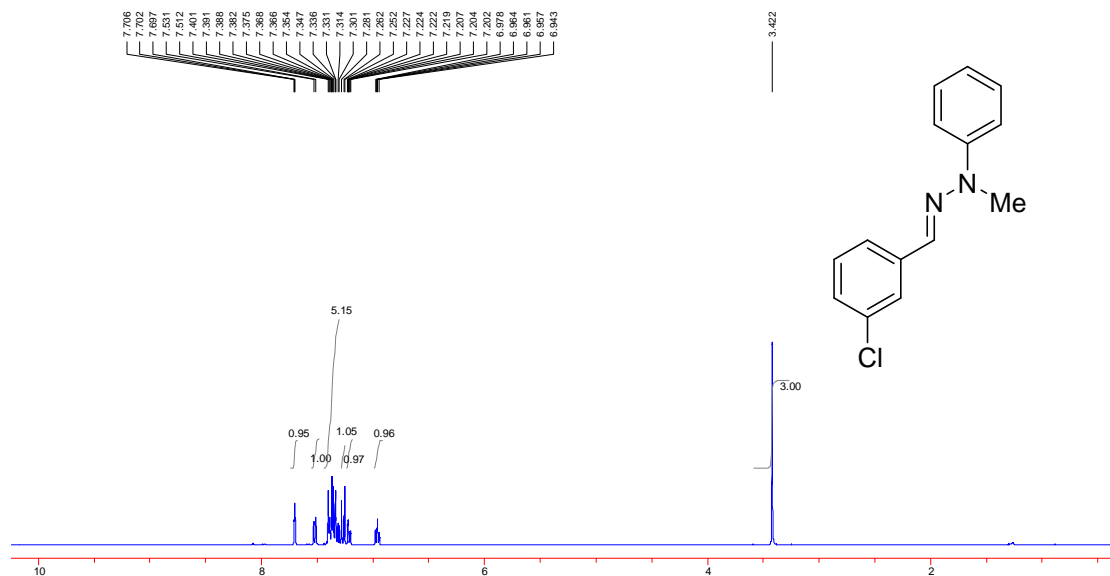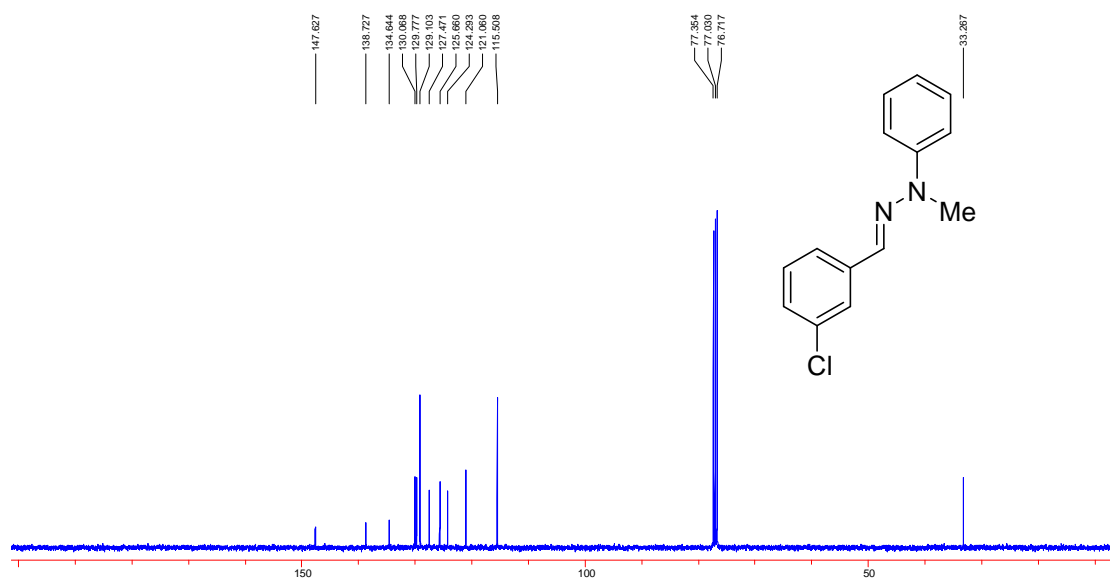

# NMR spectra of **1m**

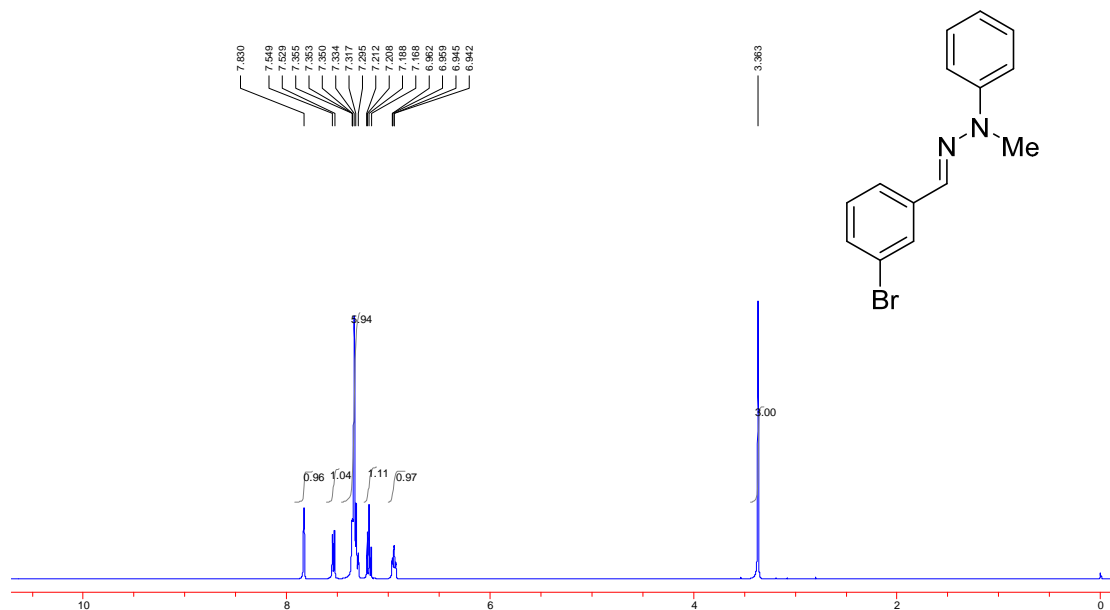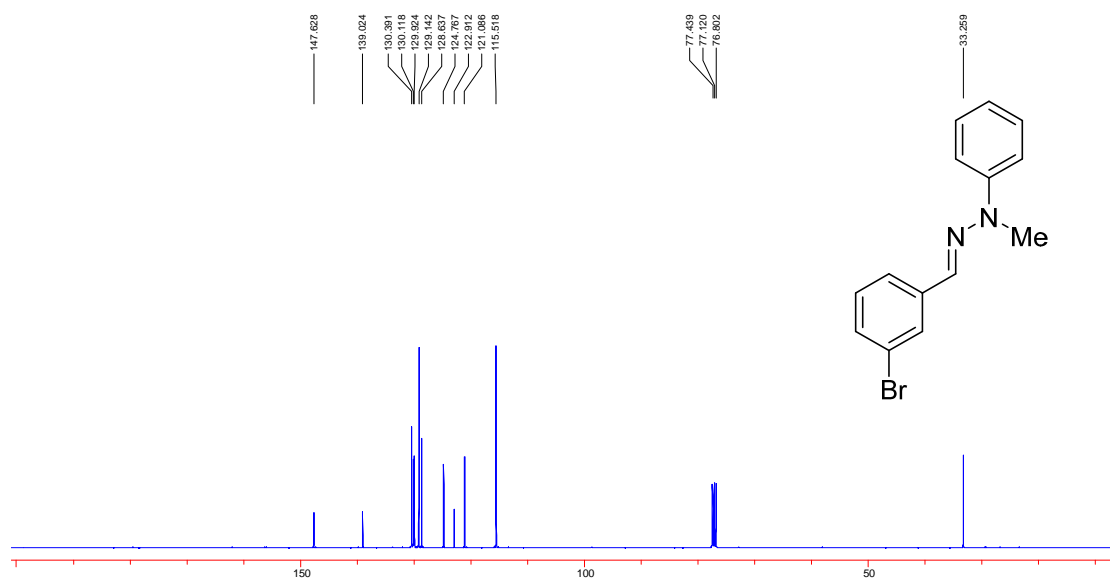

# NMR spectra of **1n**

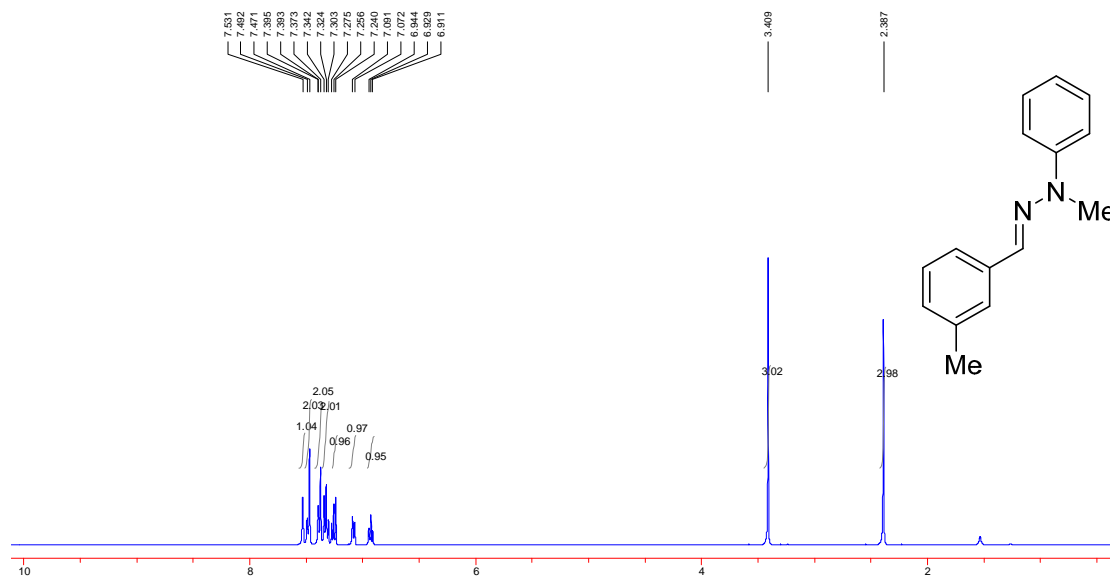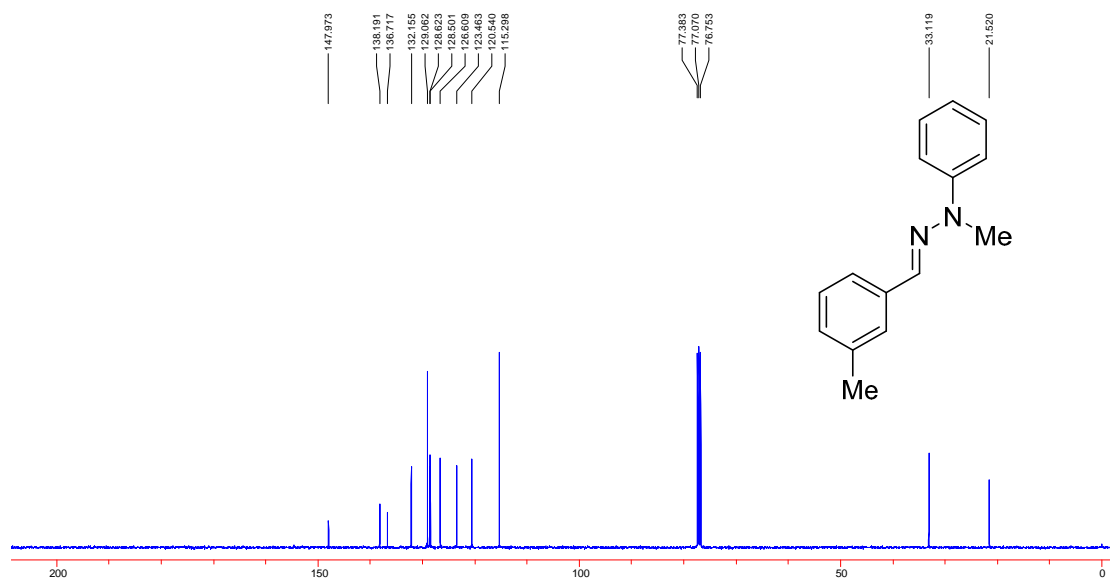

# NMR spectra of **1o**

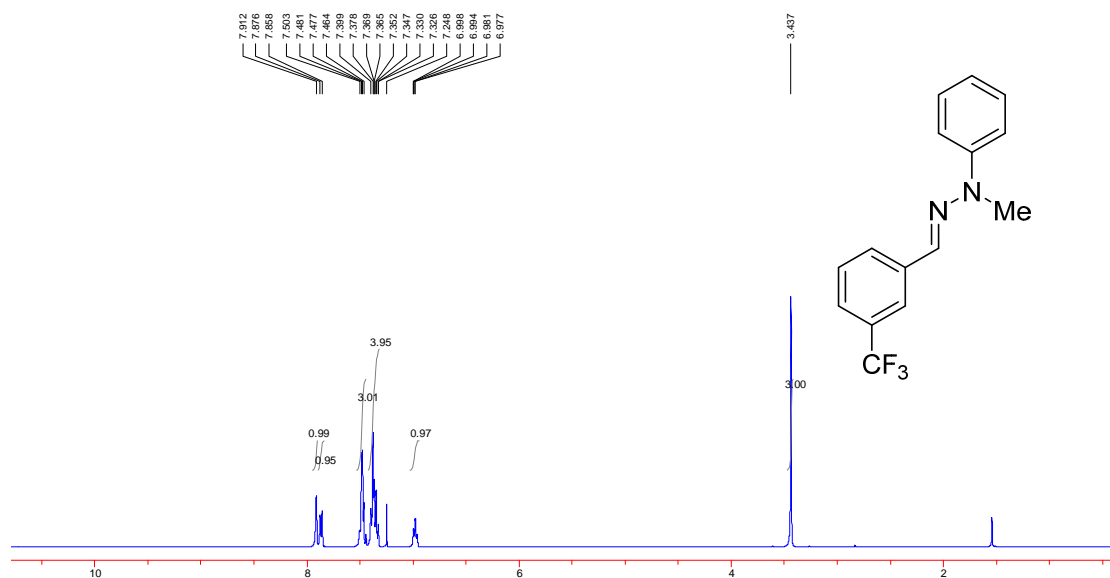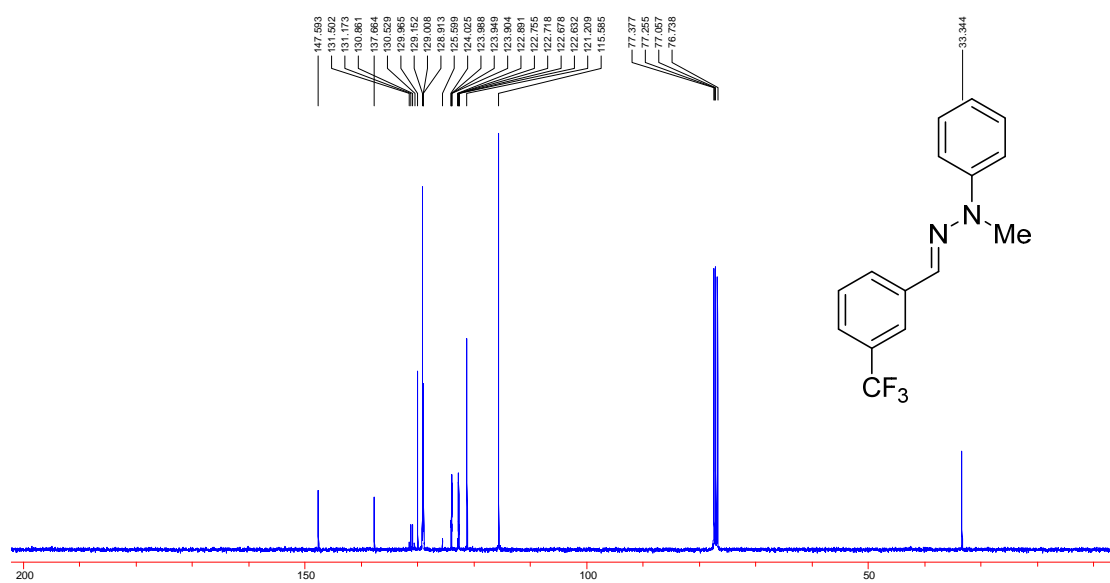

# NMR spectra of **1p**

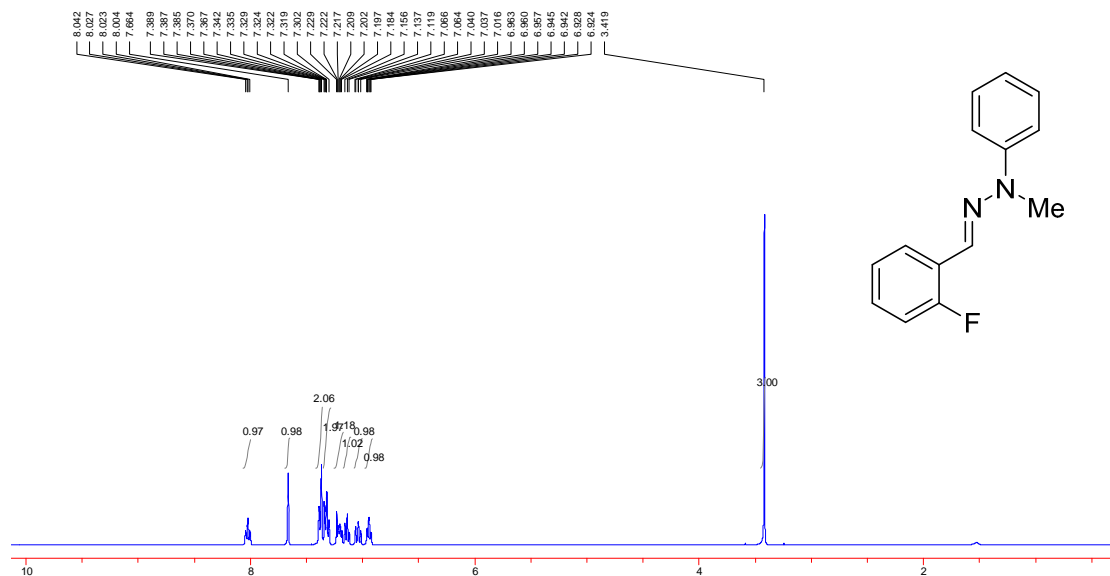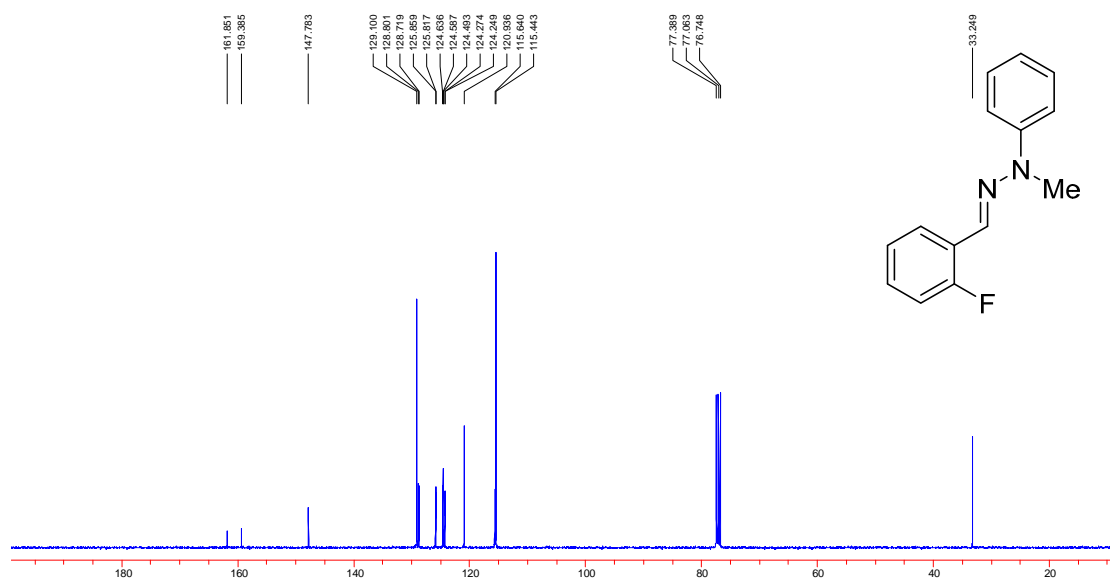

# NMR spectra of **1q**

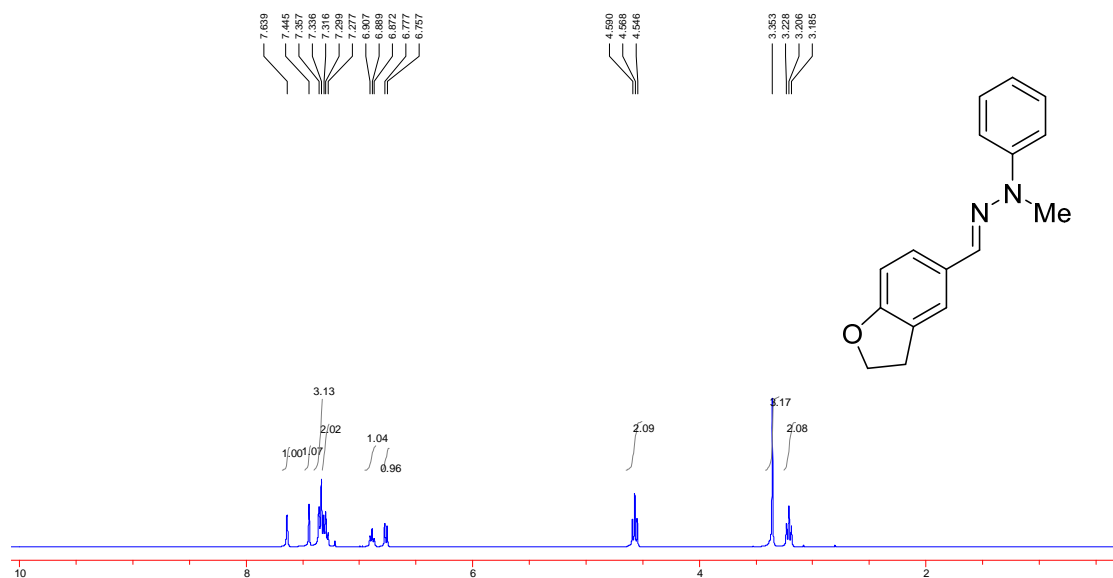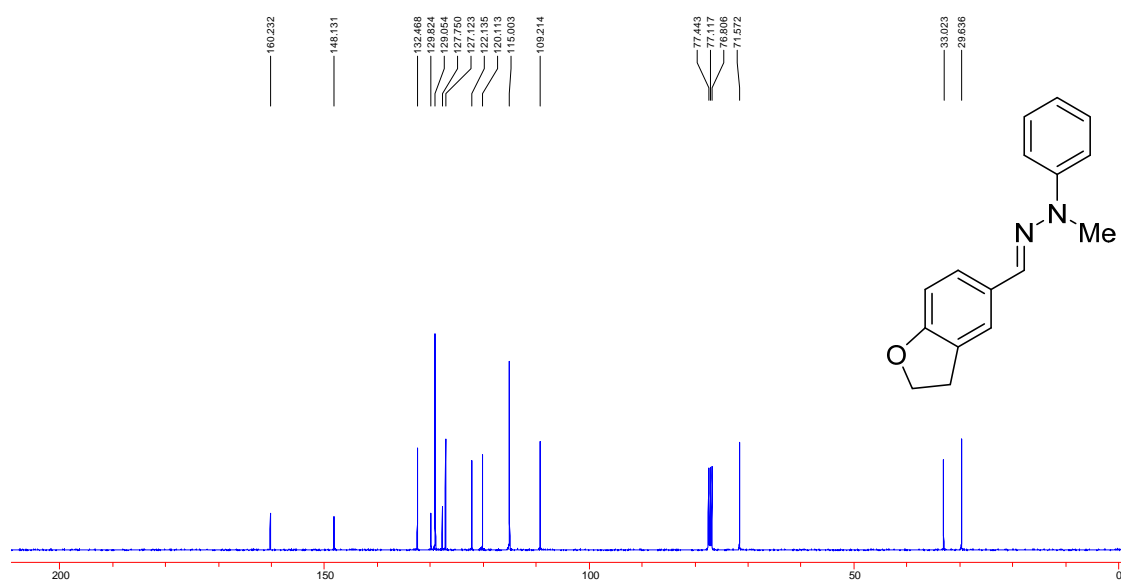

# NMR spectra of **1r**

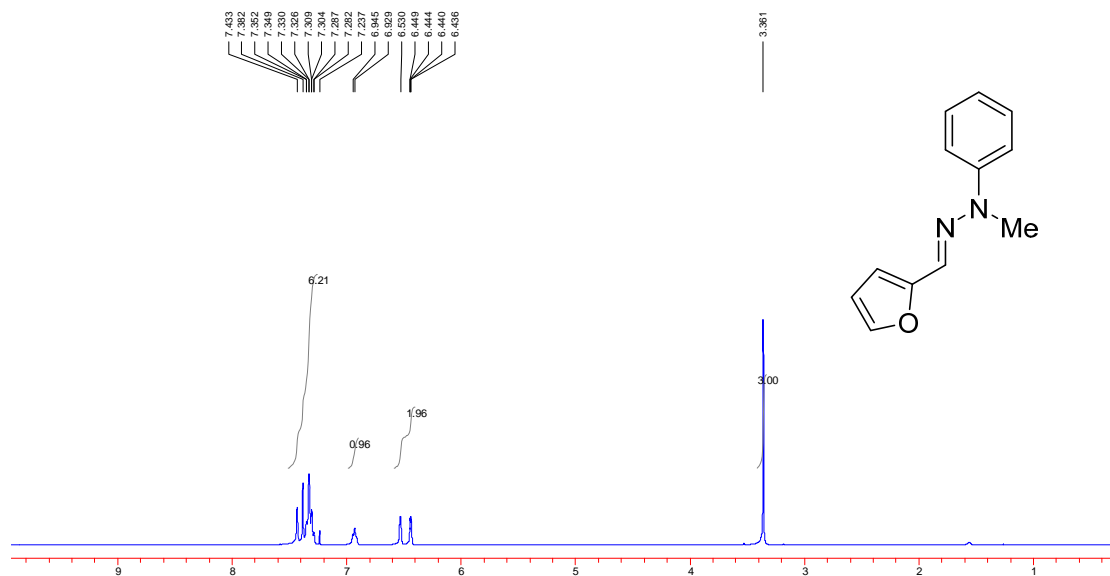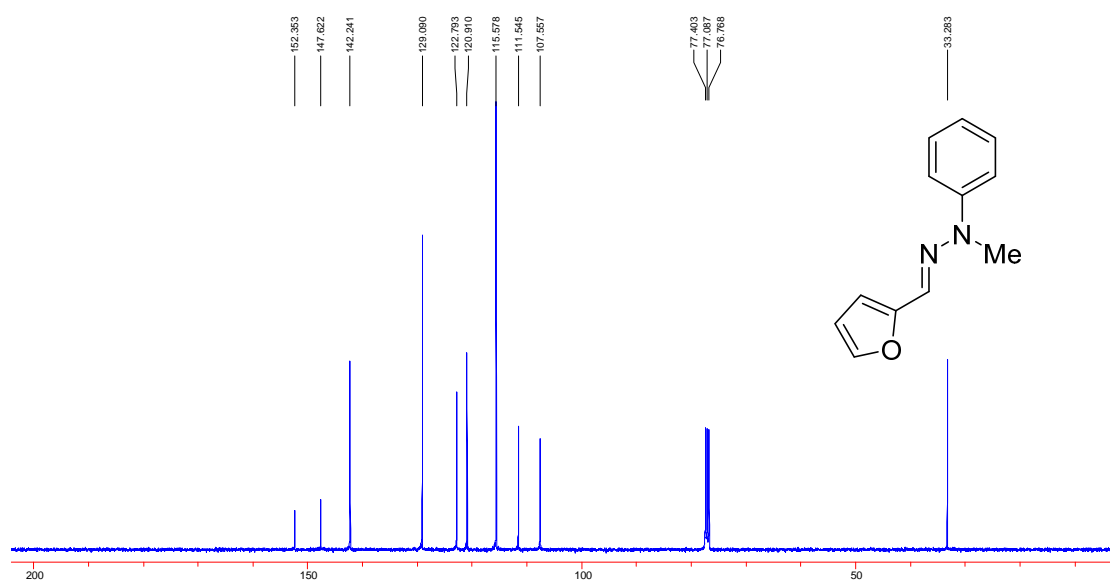

# NMR spectra of **1s**

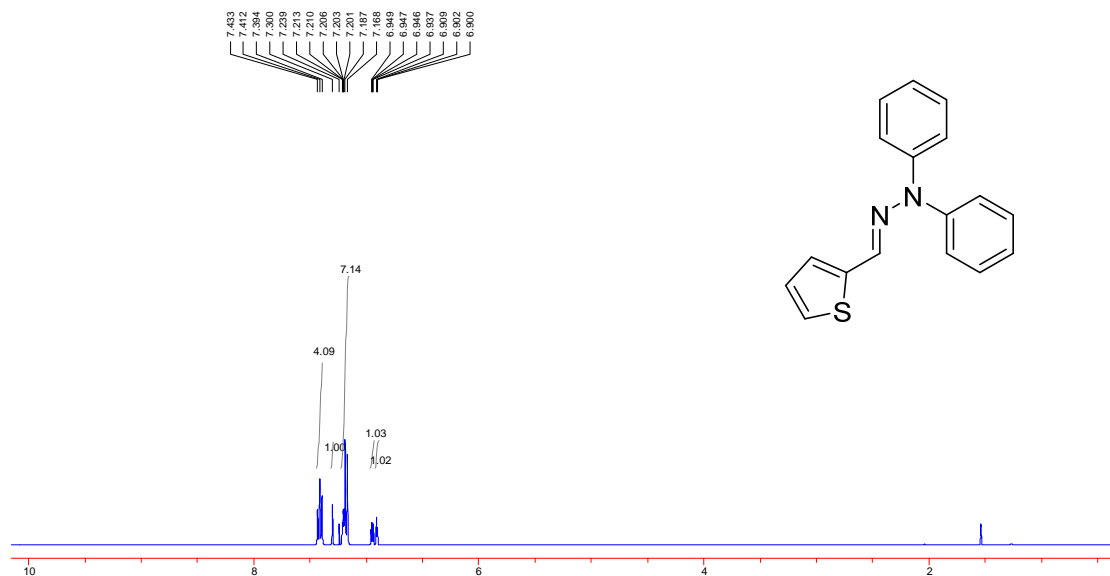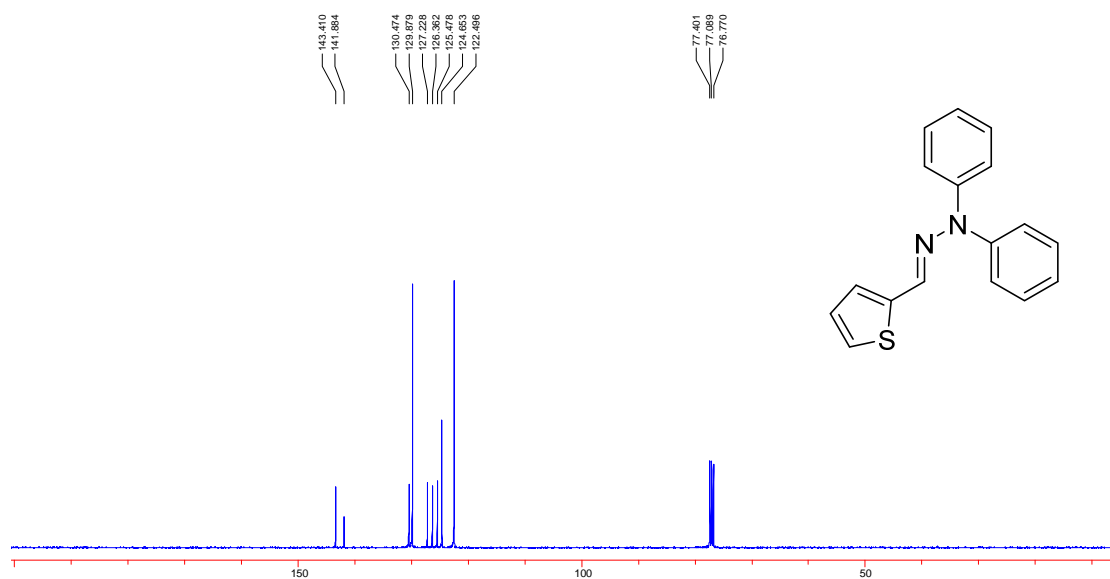



# NMR spectra of **1t**

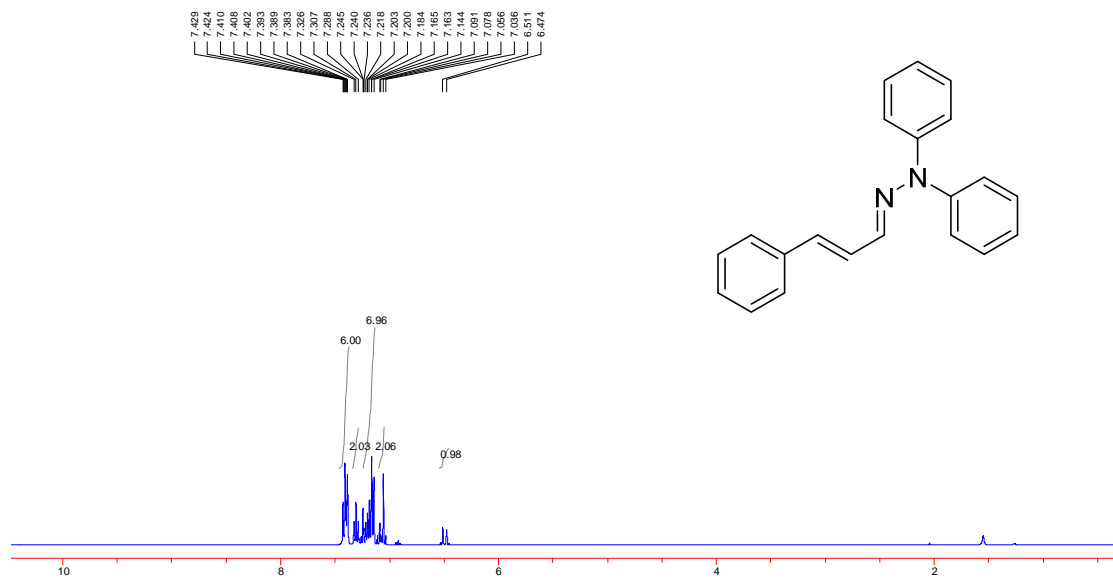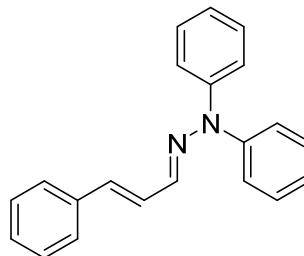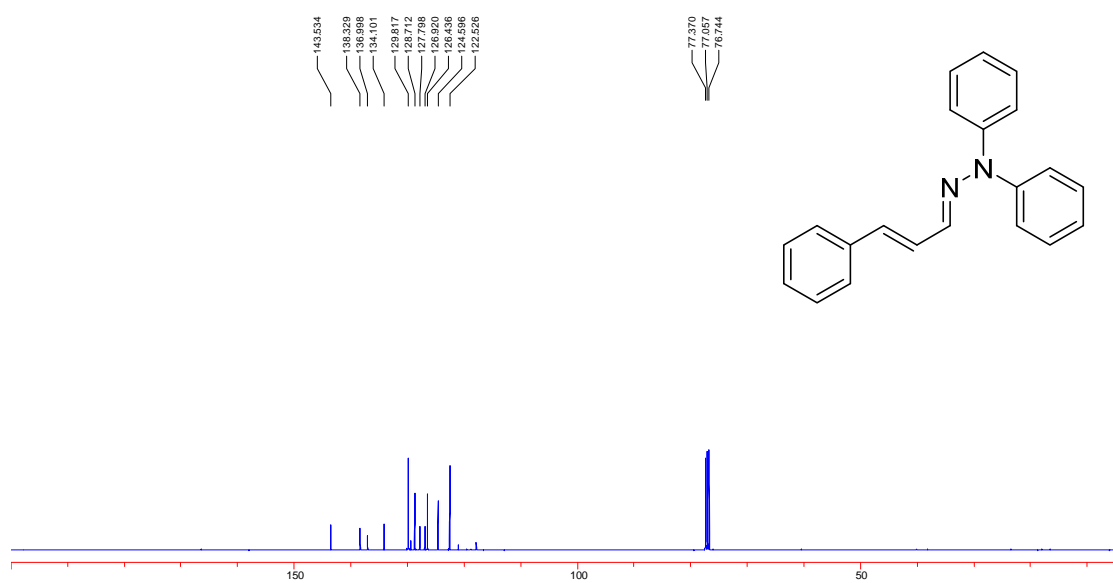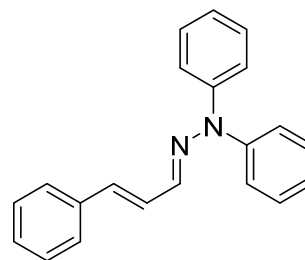

# NMR spectra of **1u**

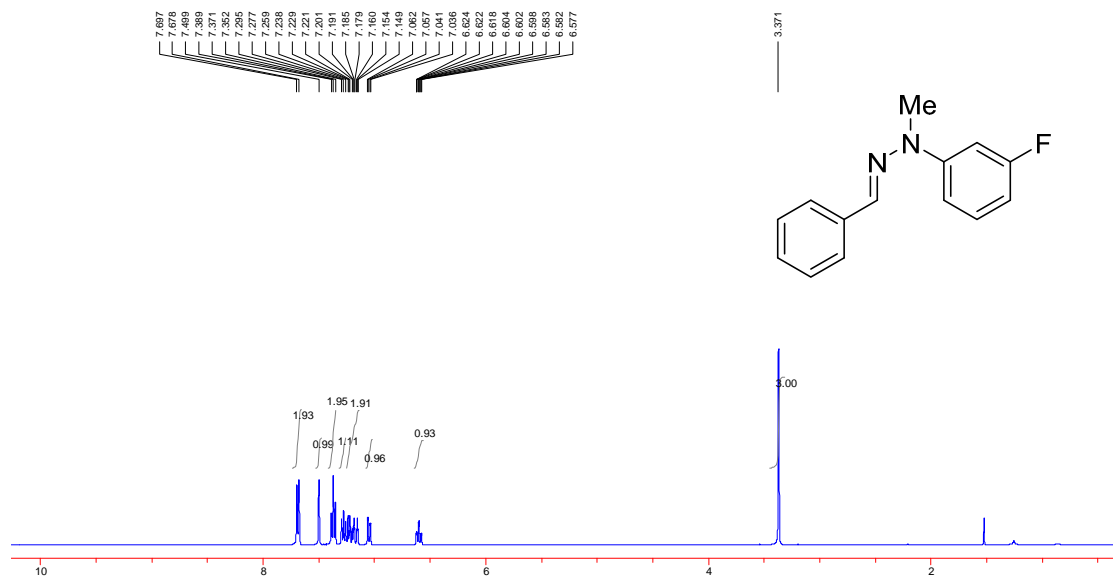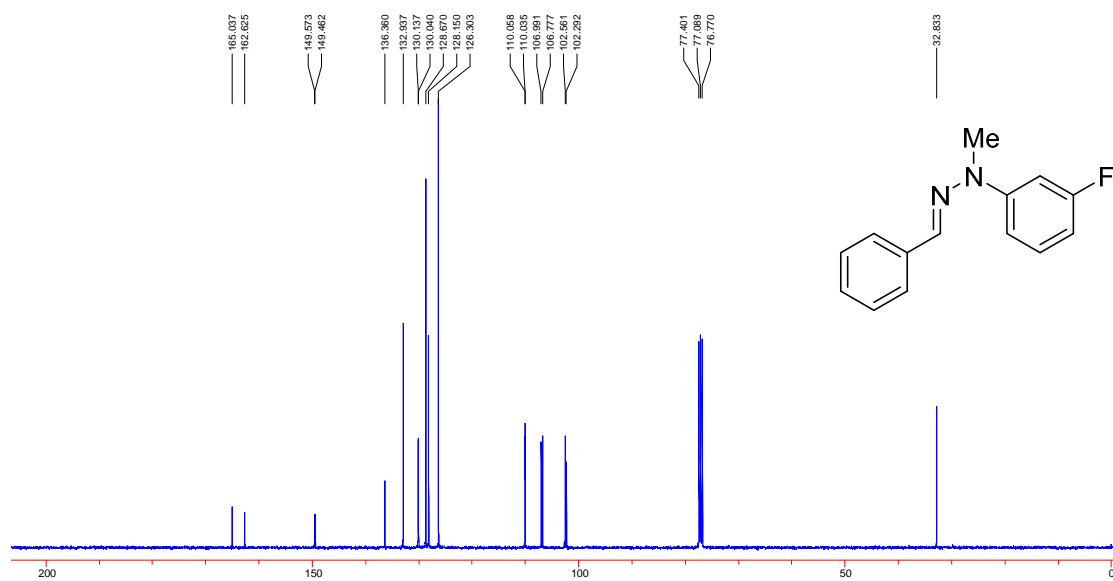

# NMR spectra of **1v**

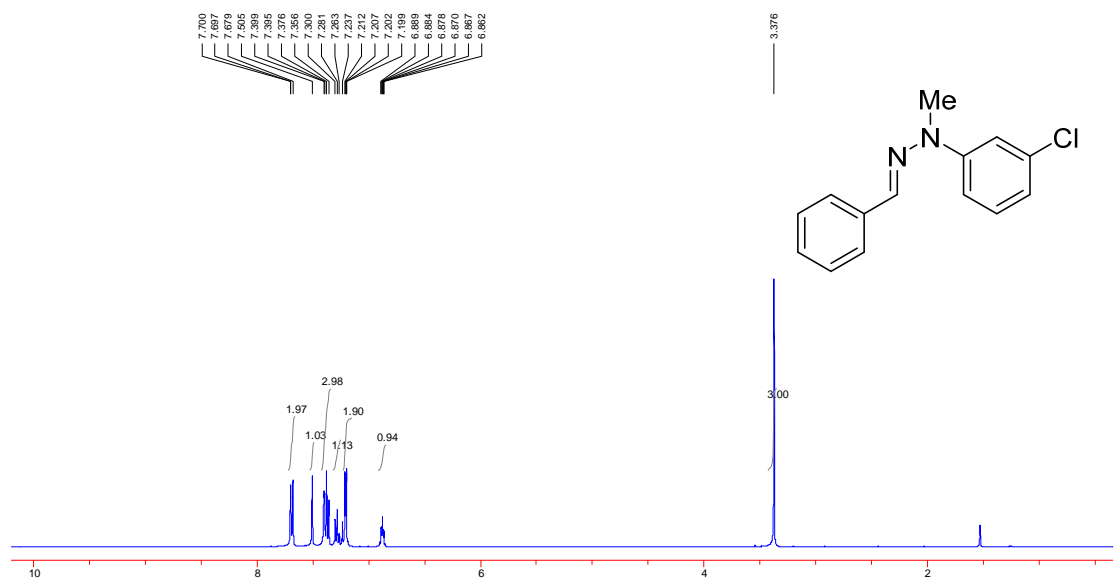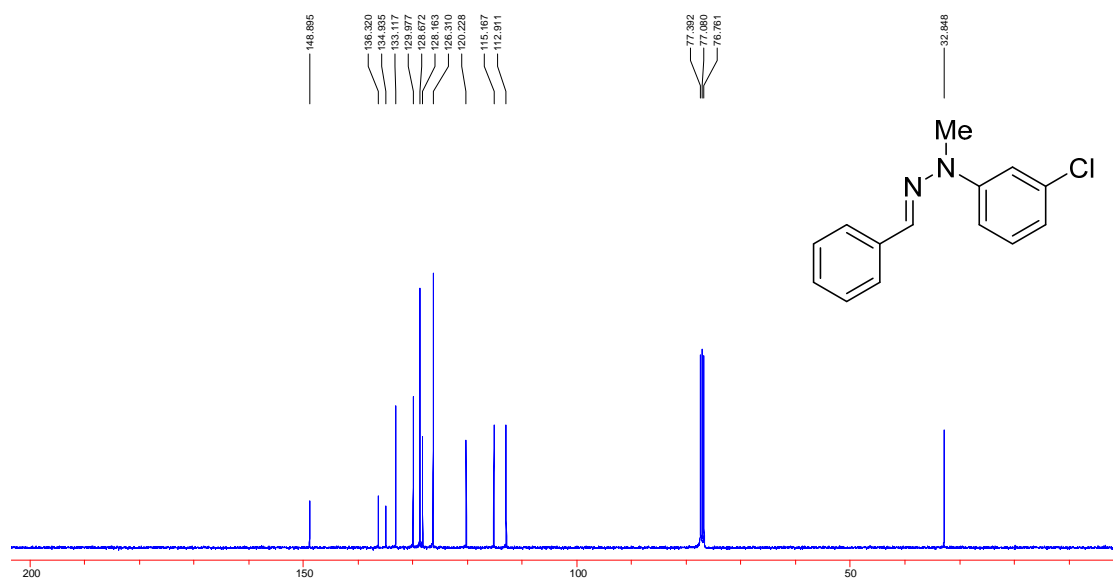

# NMR spectra of **1w**

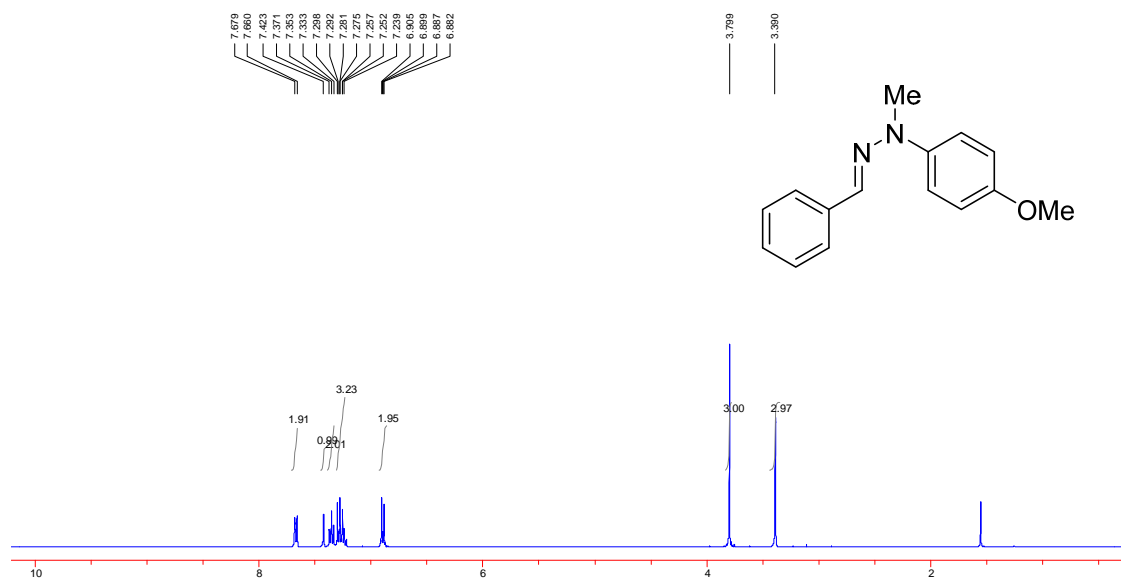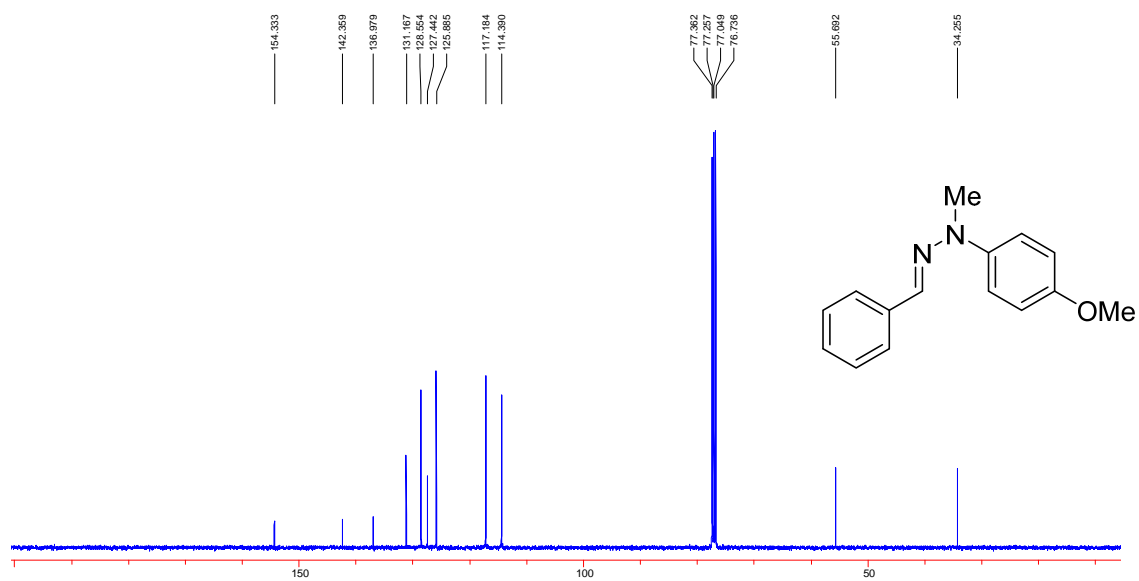

# NMR spectra of **1x**

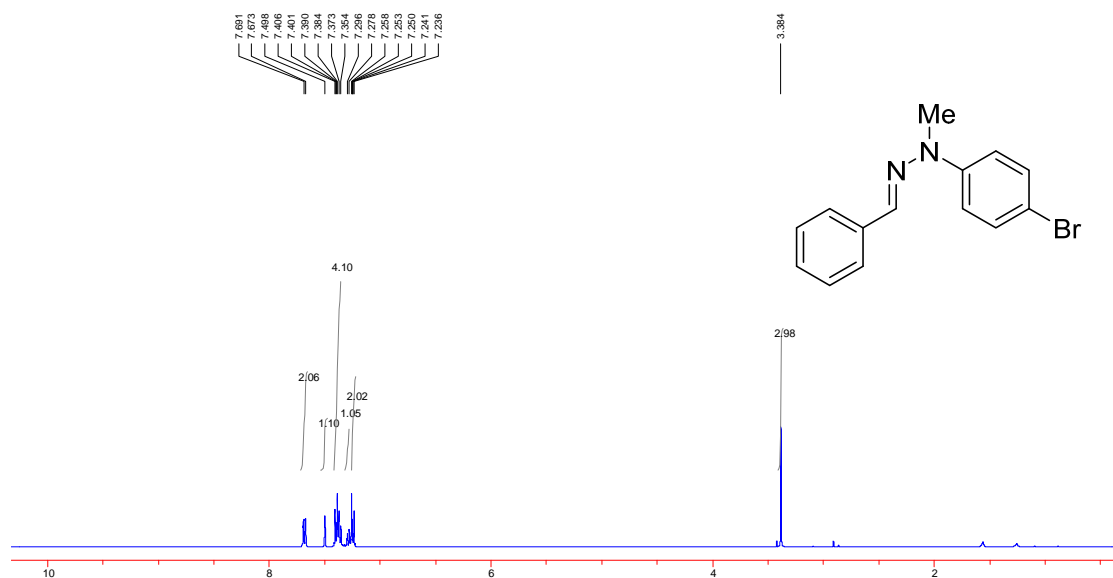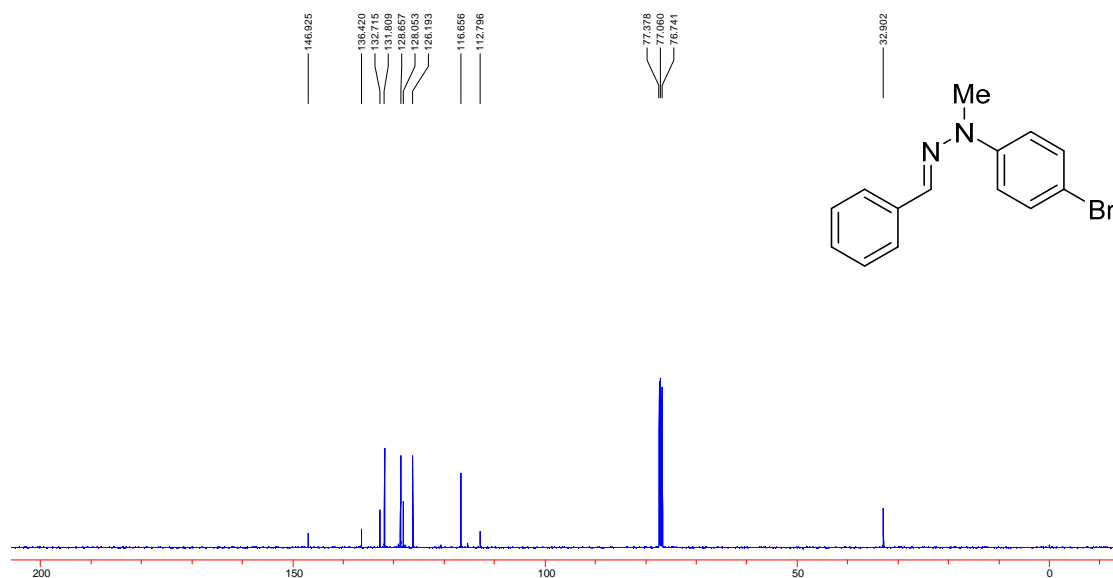

# NMR spectra of **3a**

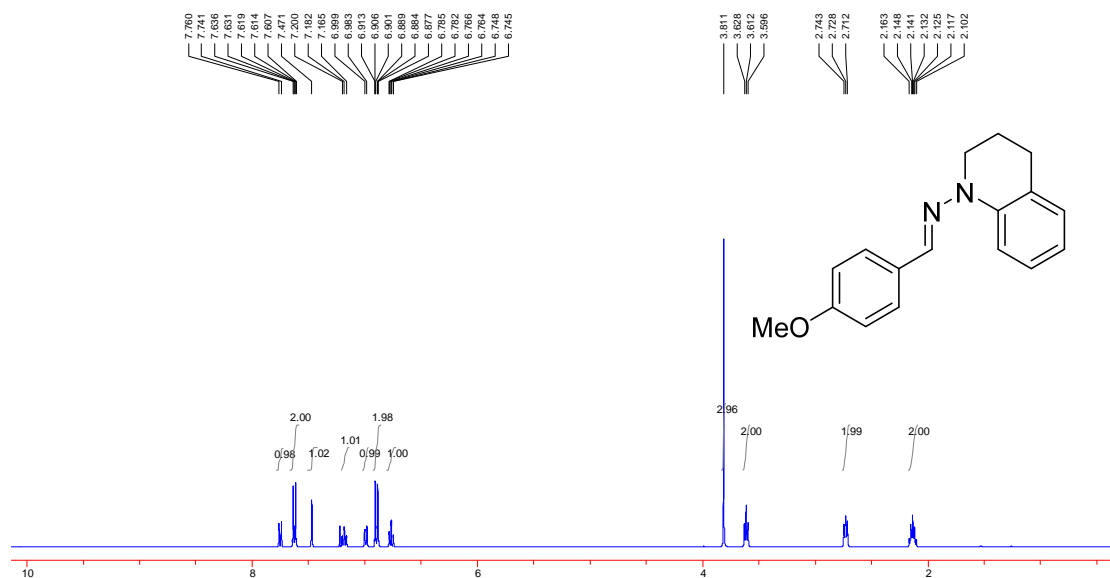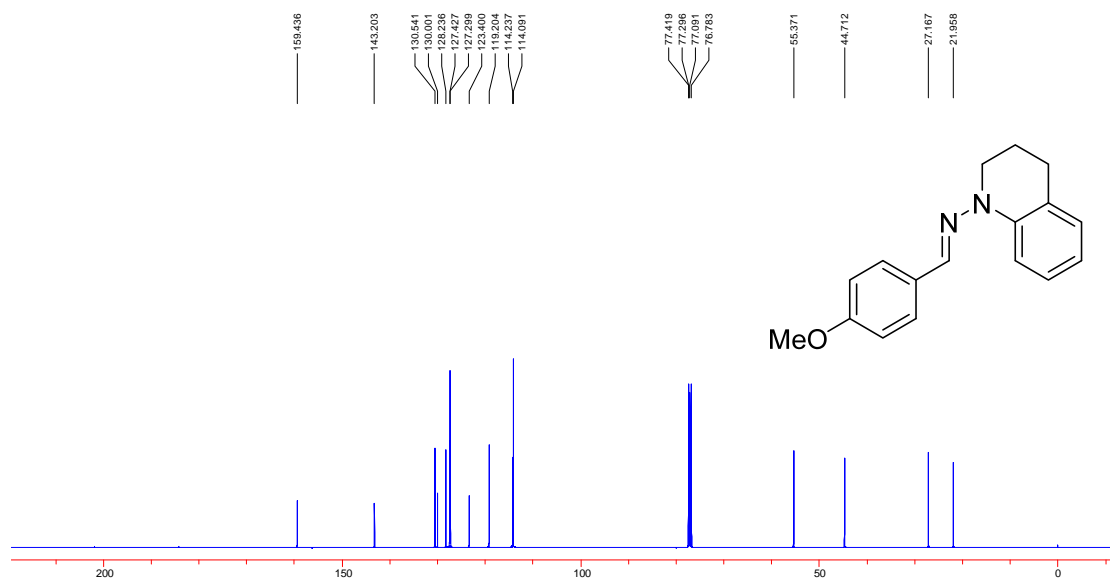

# NMR spectra of **3b**

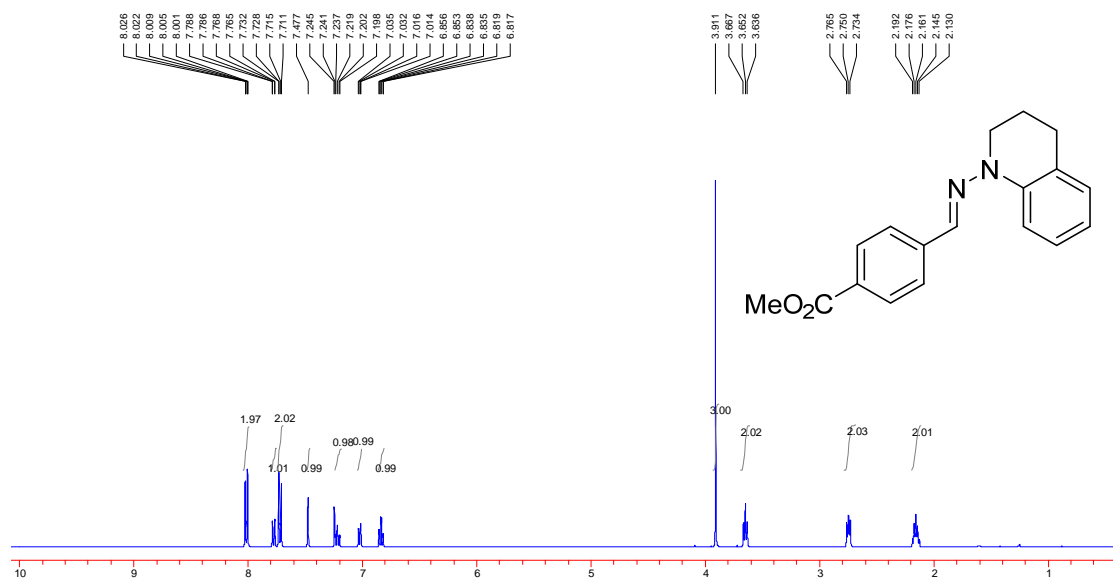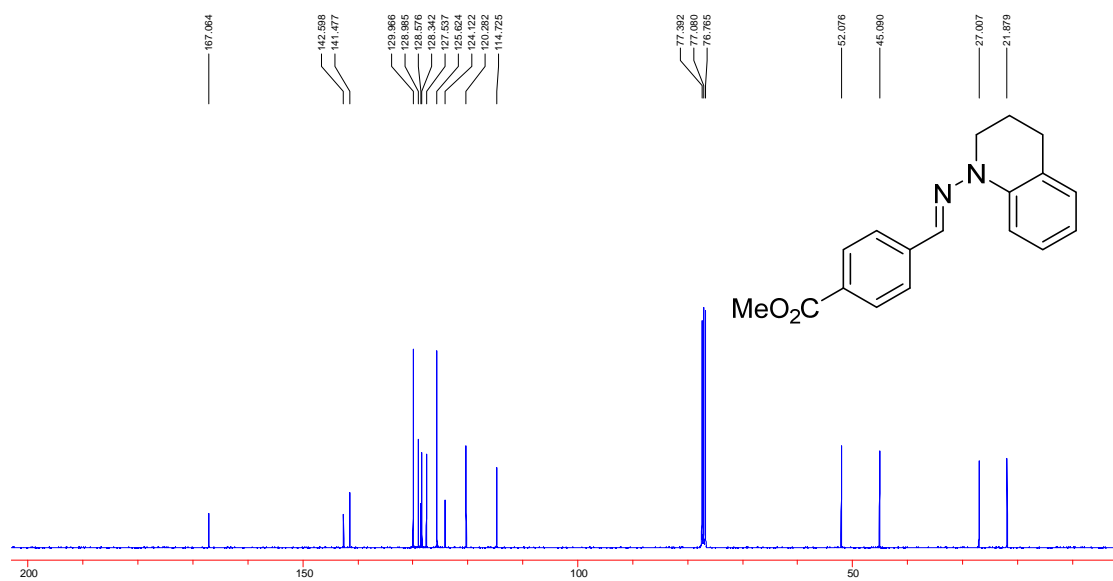

# NMR spectra of **3c**

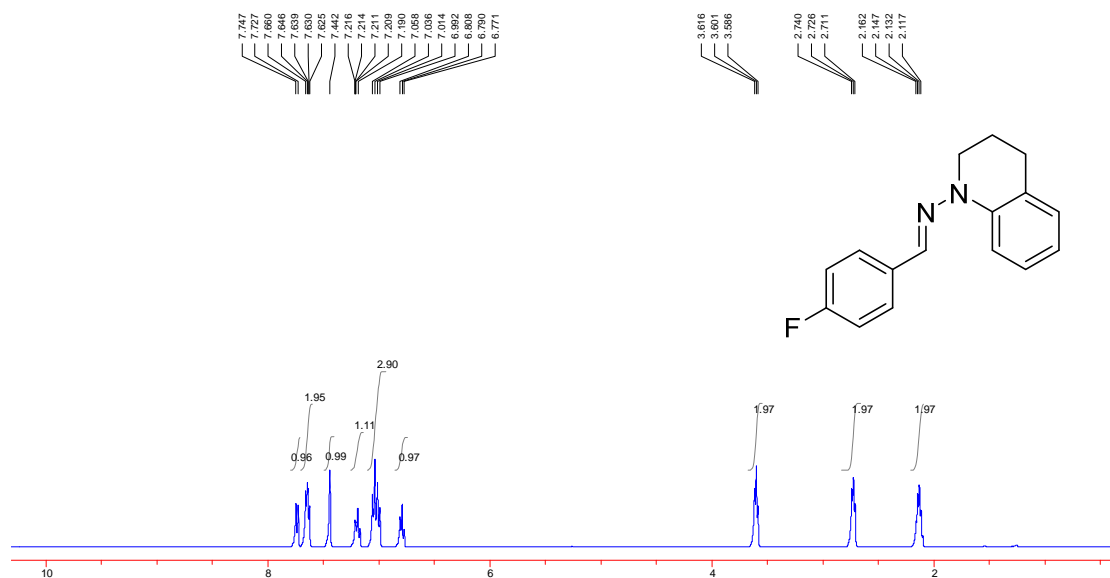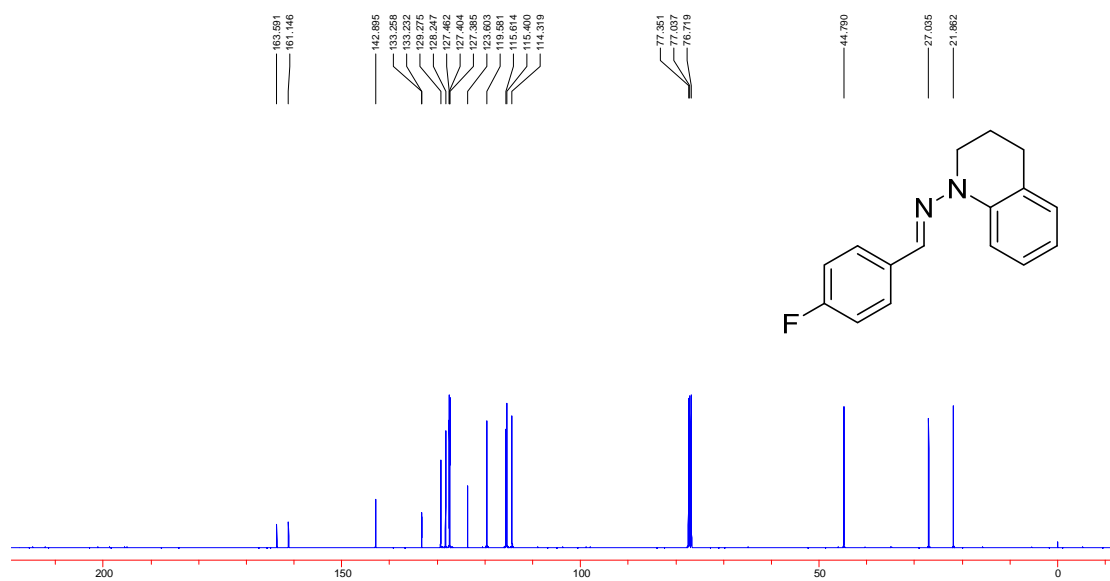



# NMR spectra of **3d**

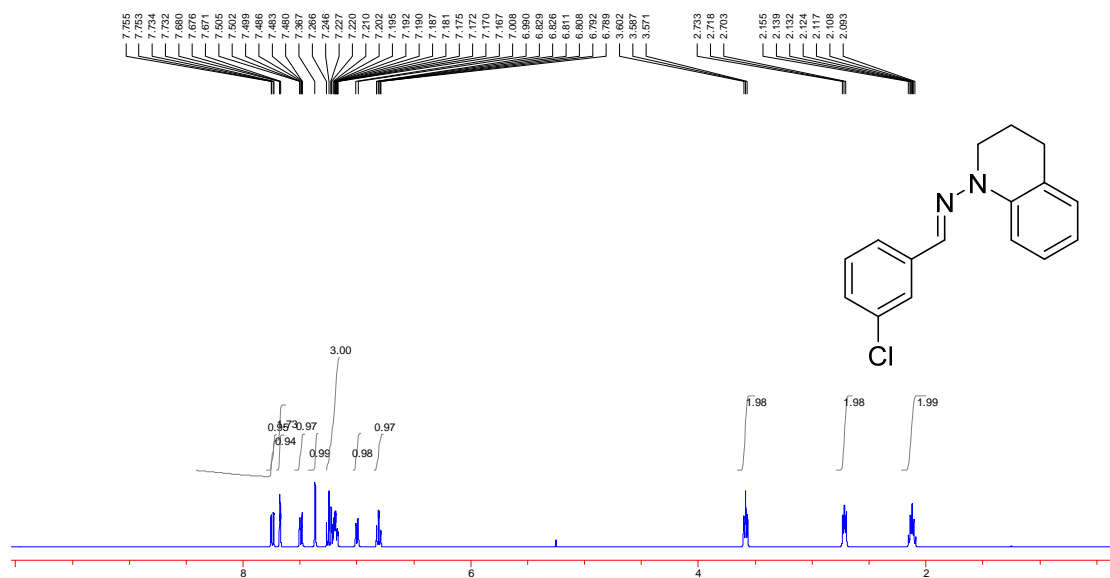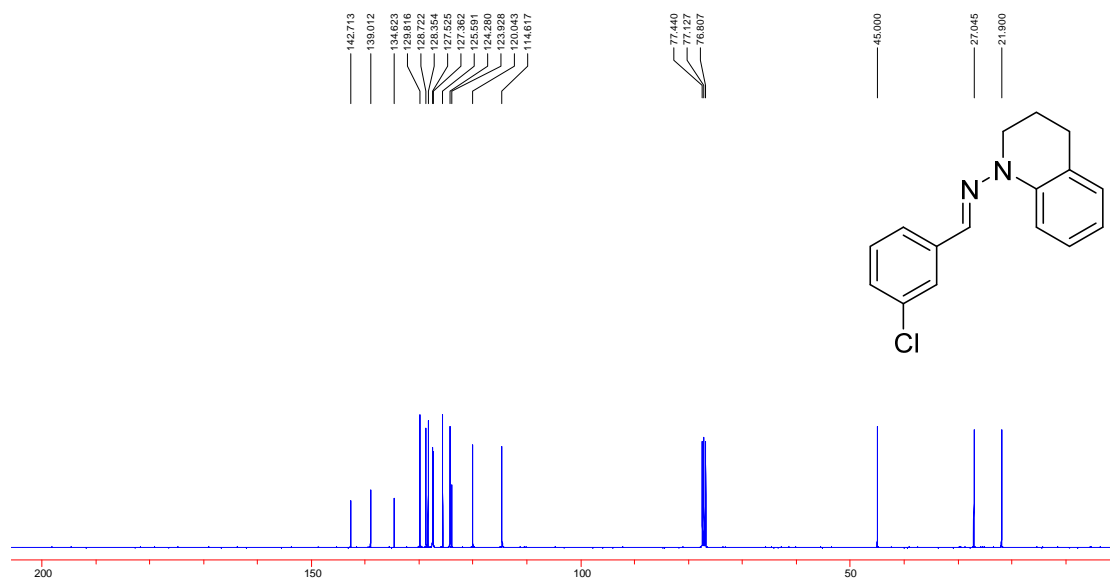

# NMR spectra of **3e**

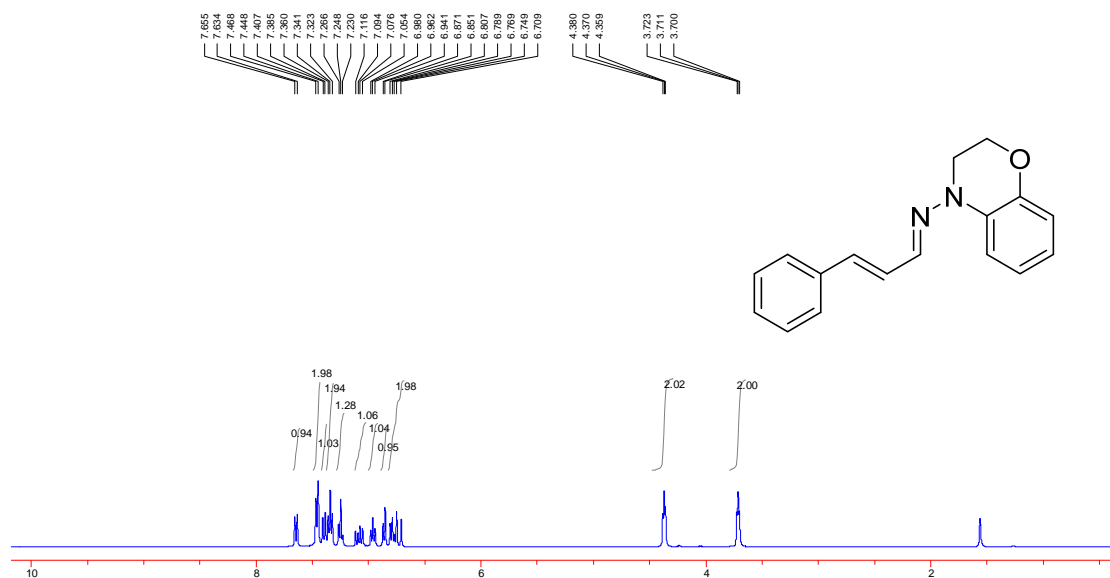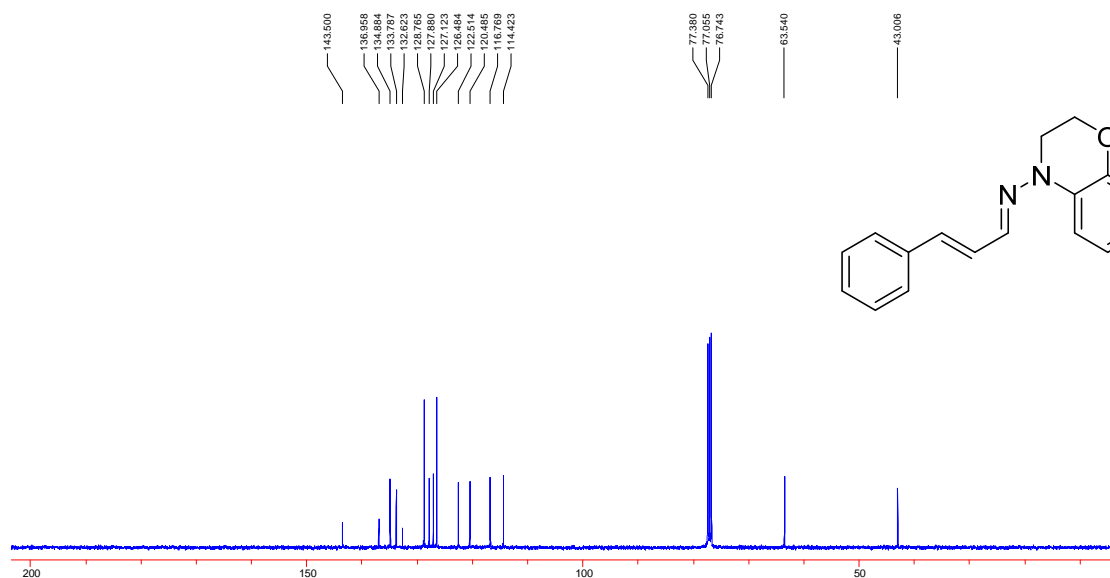

# NMR spectra of **3f**

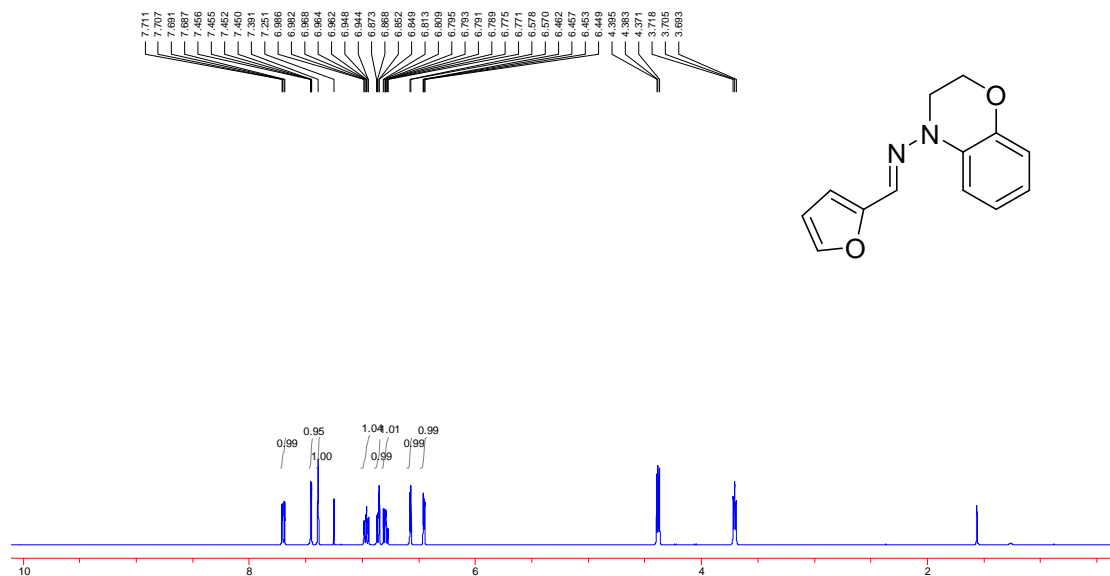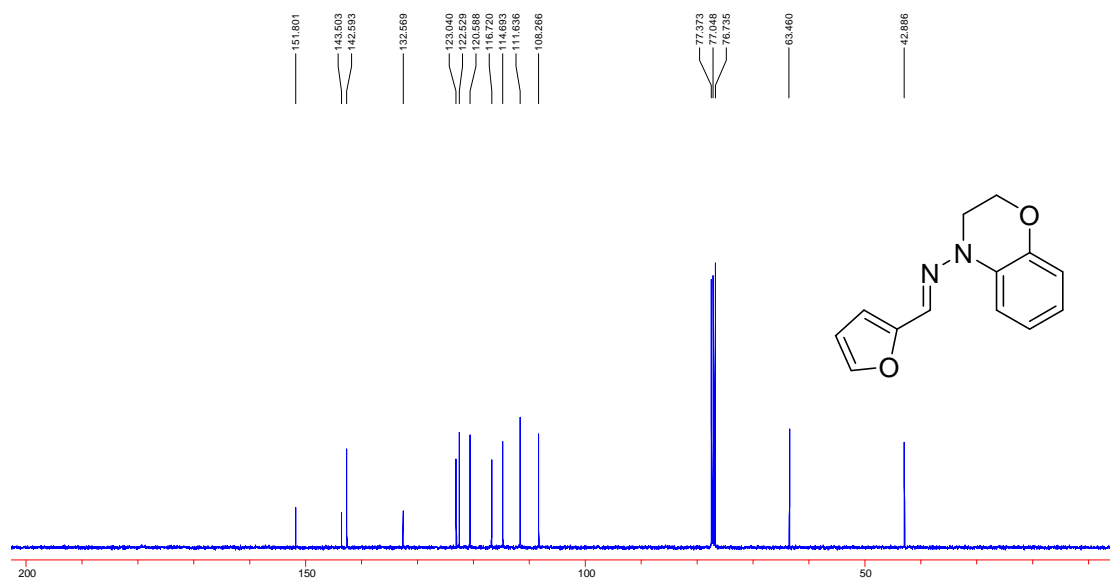

# NMR spectra of **2a**

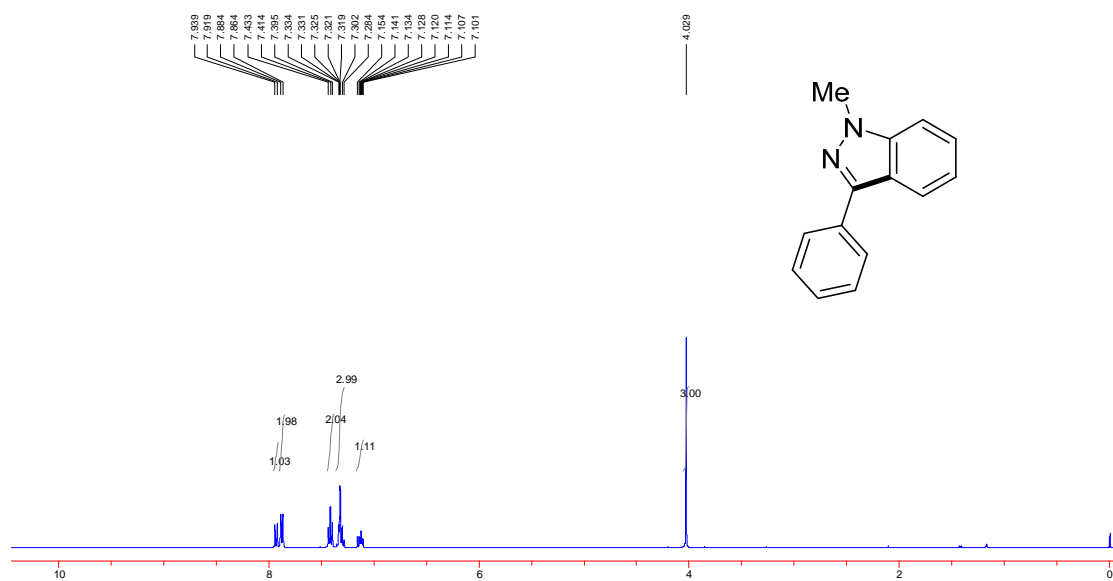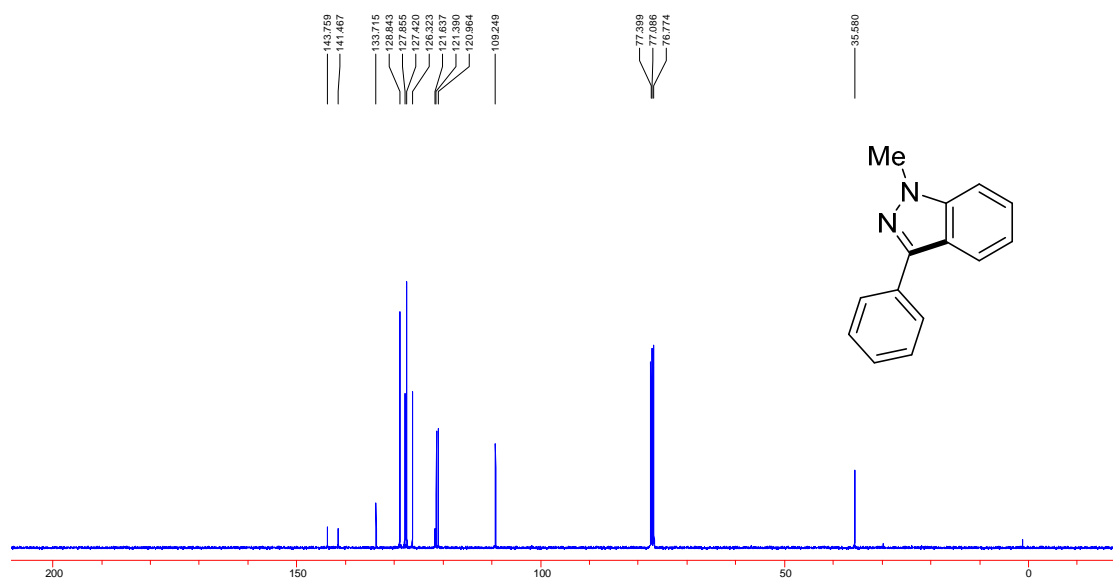

# NMR spectra of **2b**

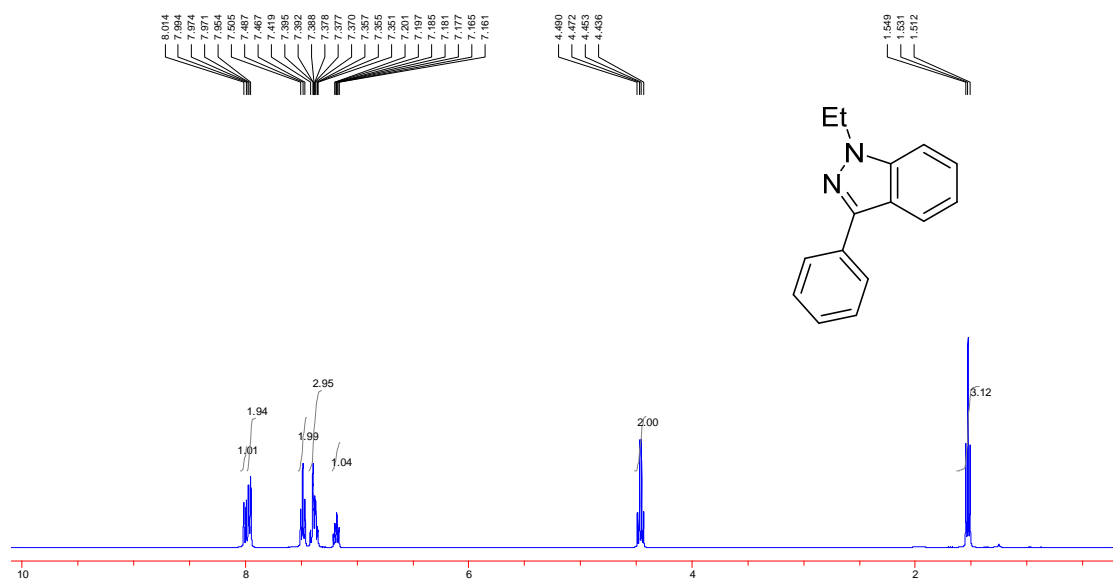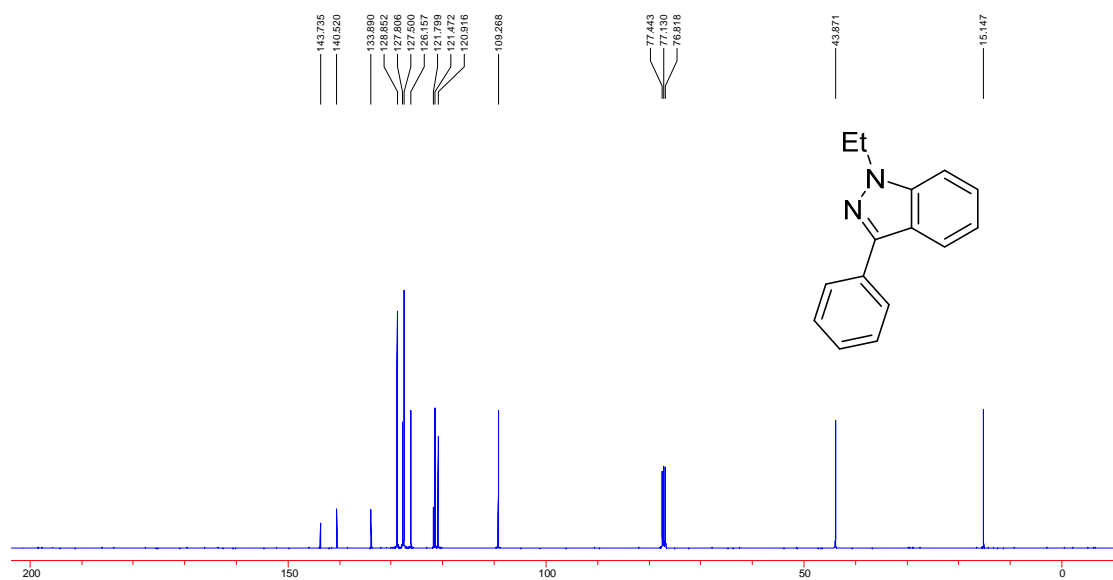

# NMR spectra of **2c**

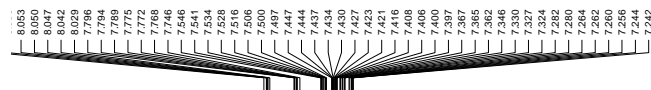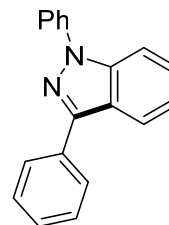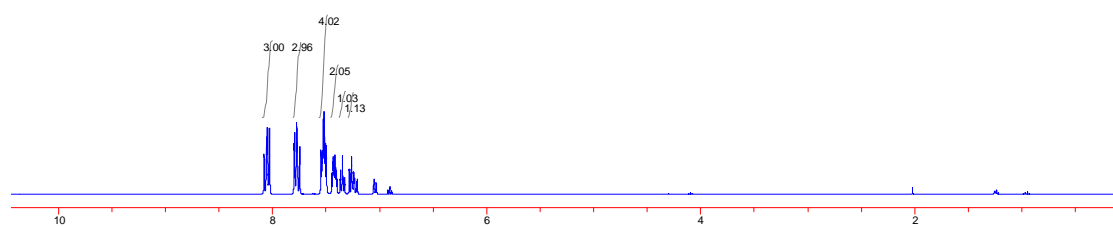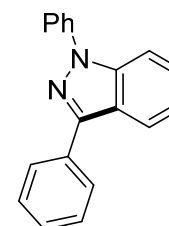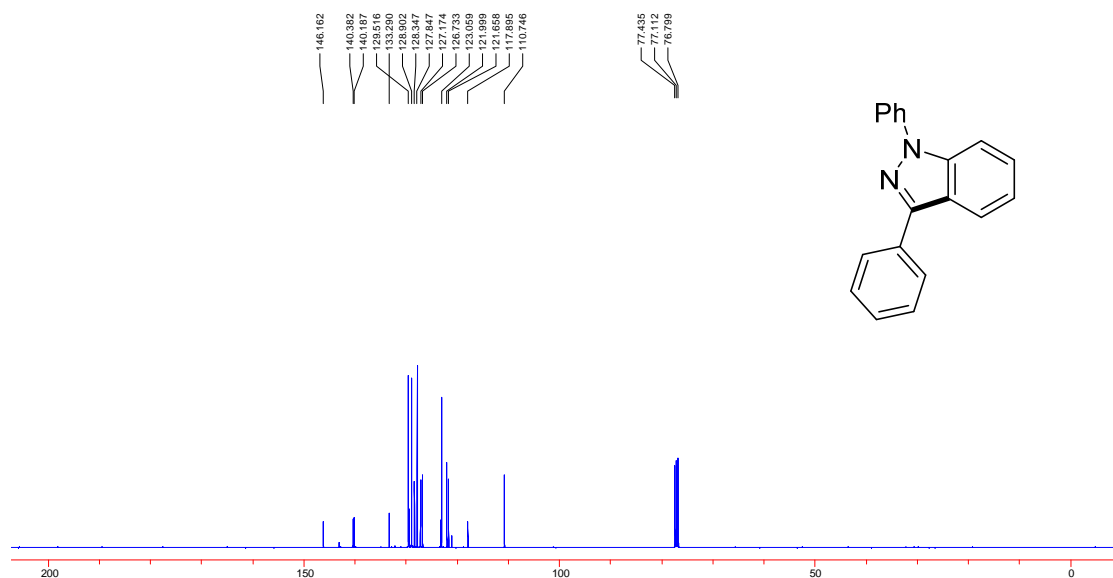

# NMR spectra of **2d**

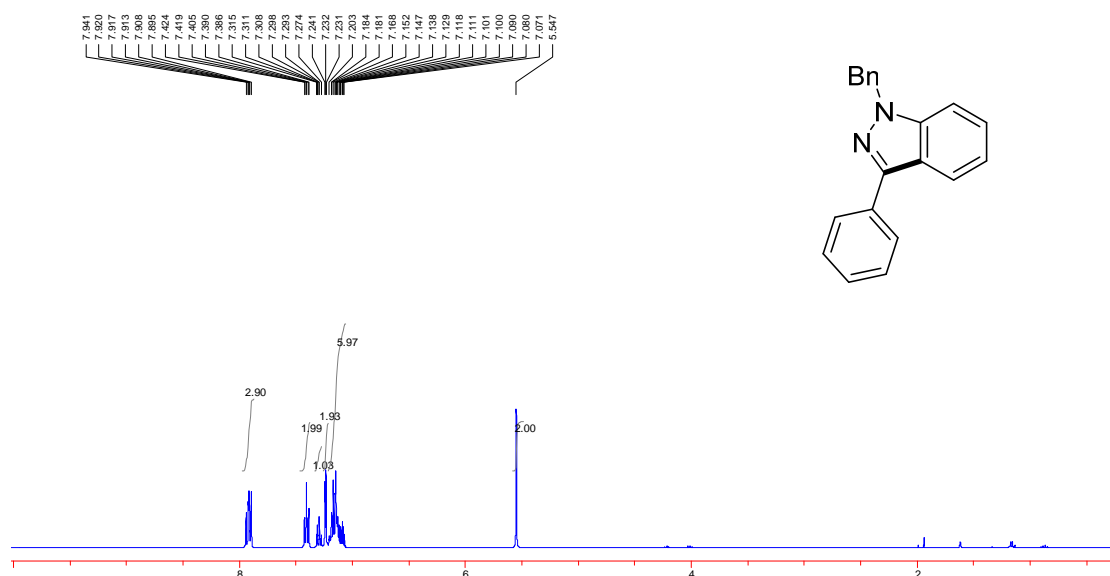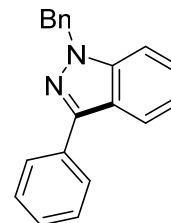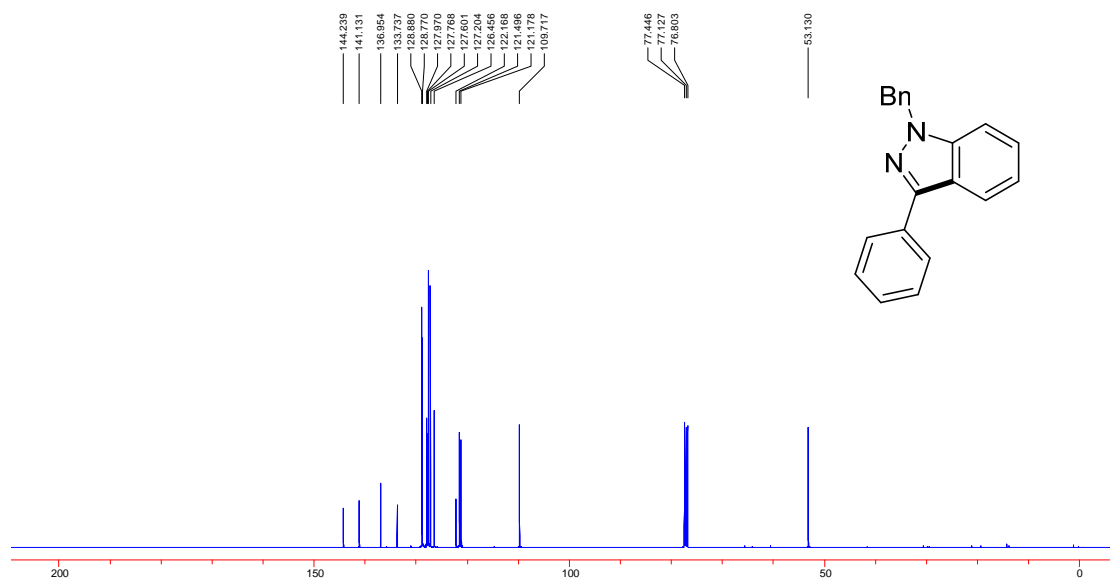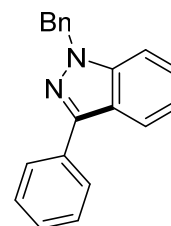

# NMR spectra of **2e**

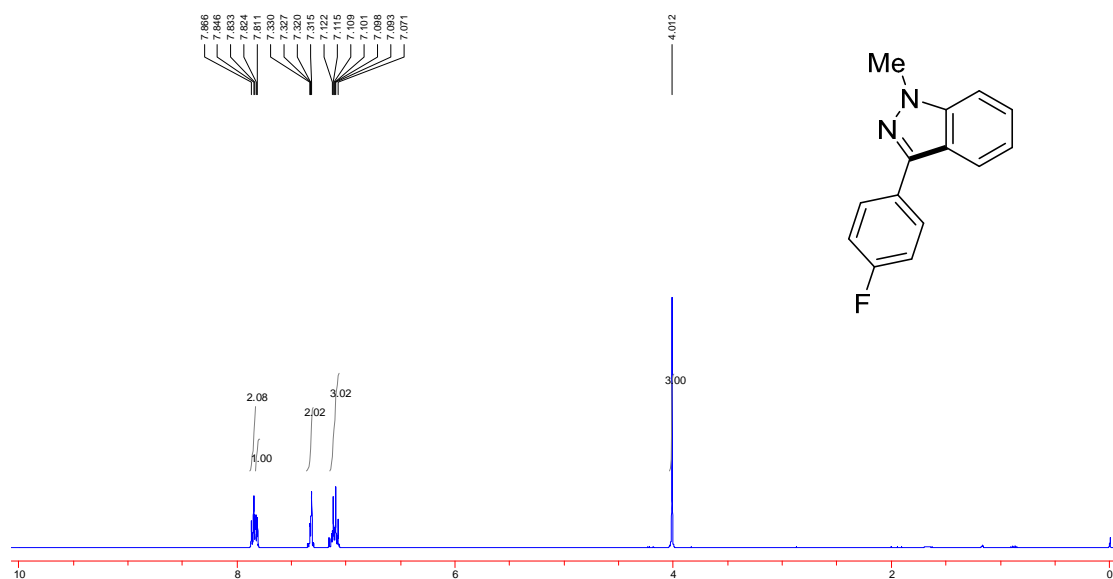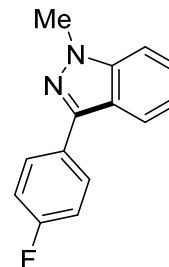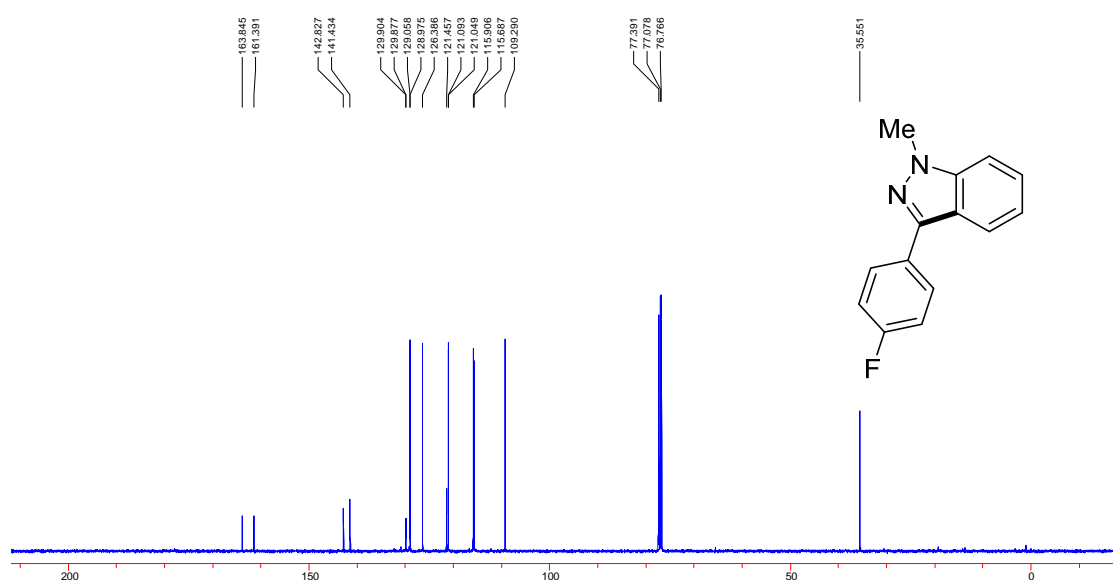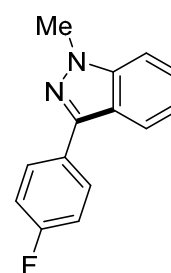



# NMR spectra of **2f**

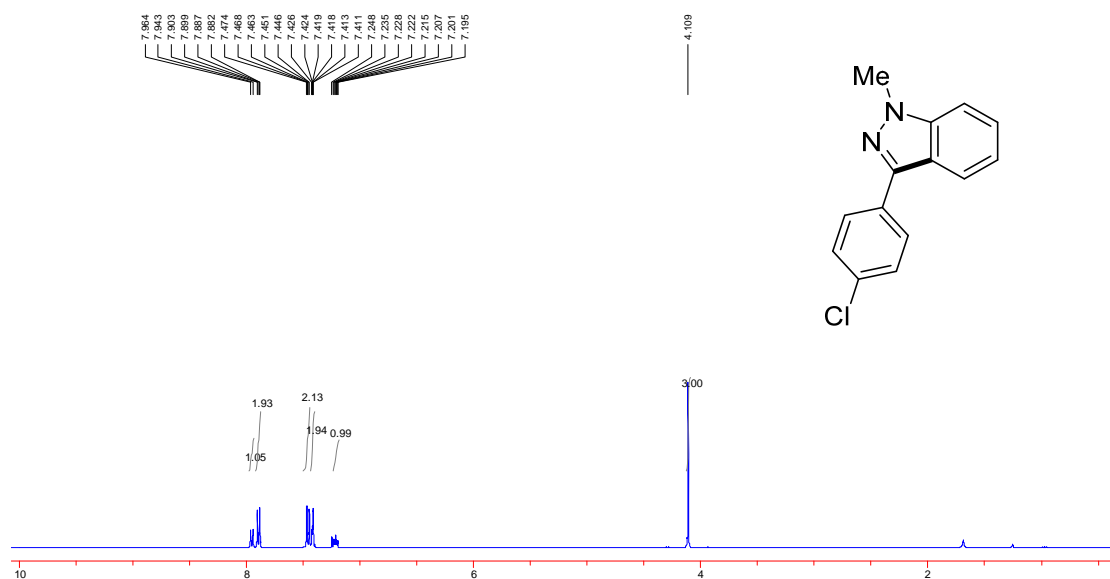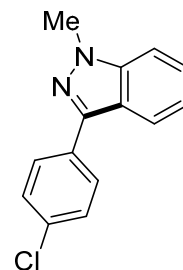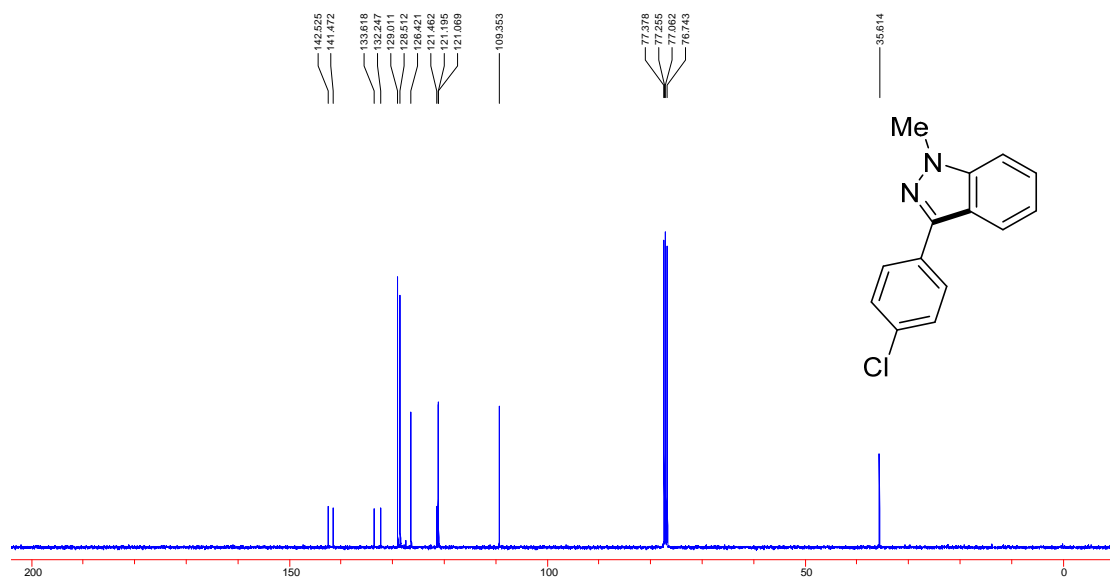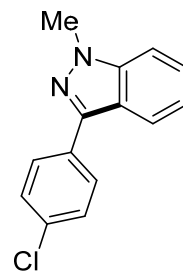

# NMR spectra of **2g**

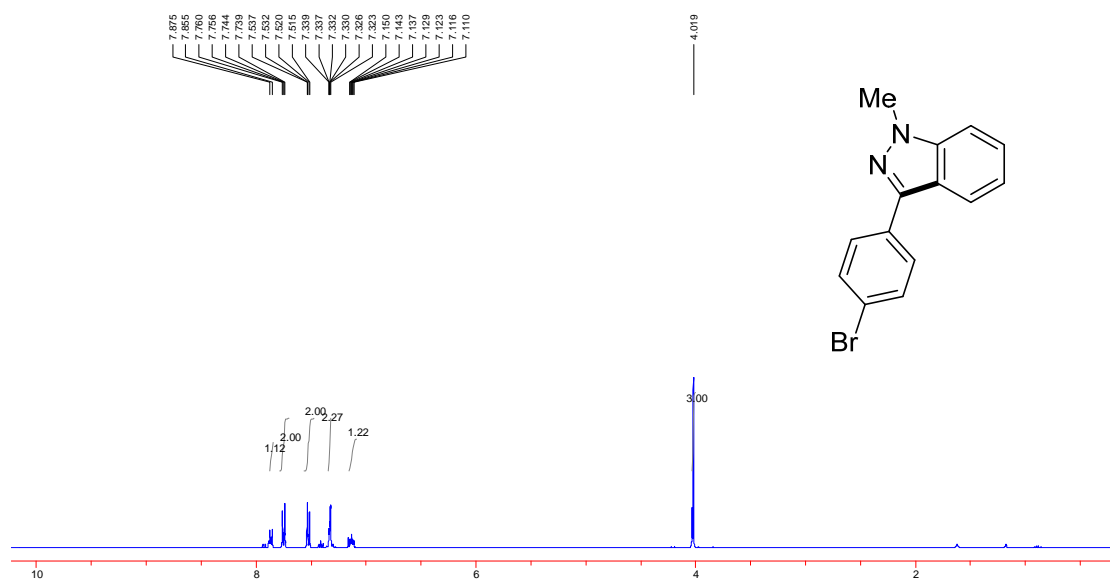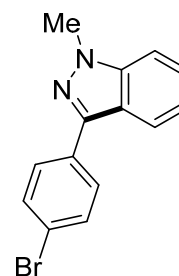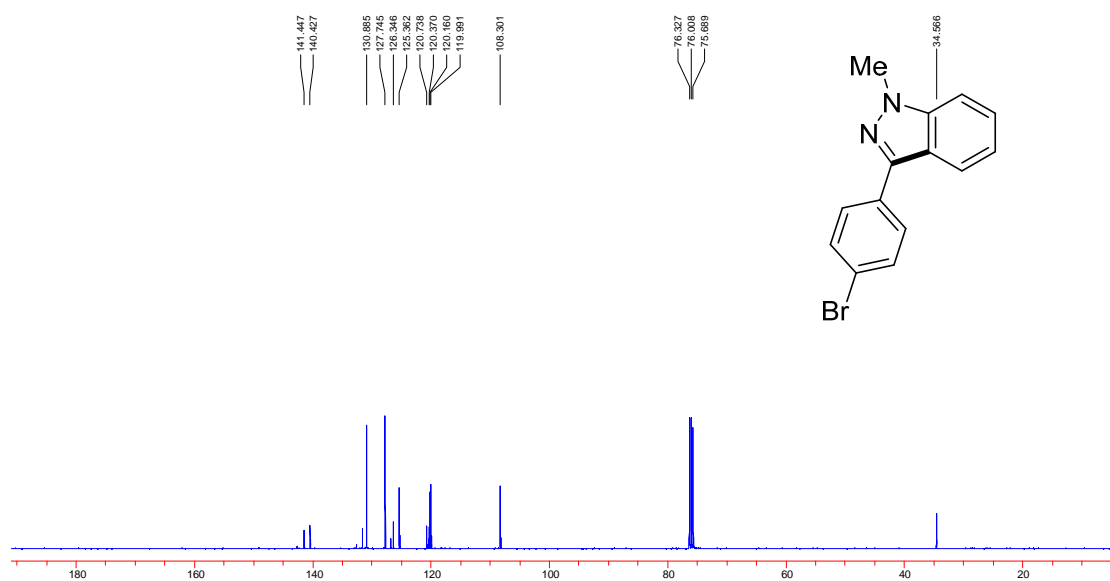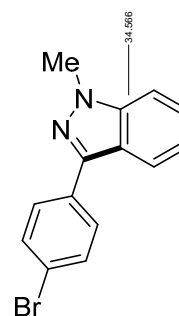

# NMR spectra of **2h**

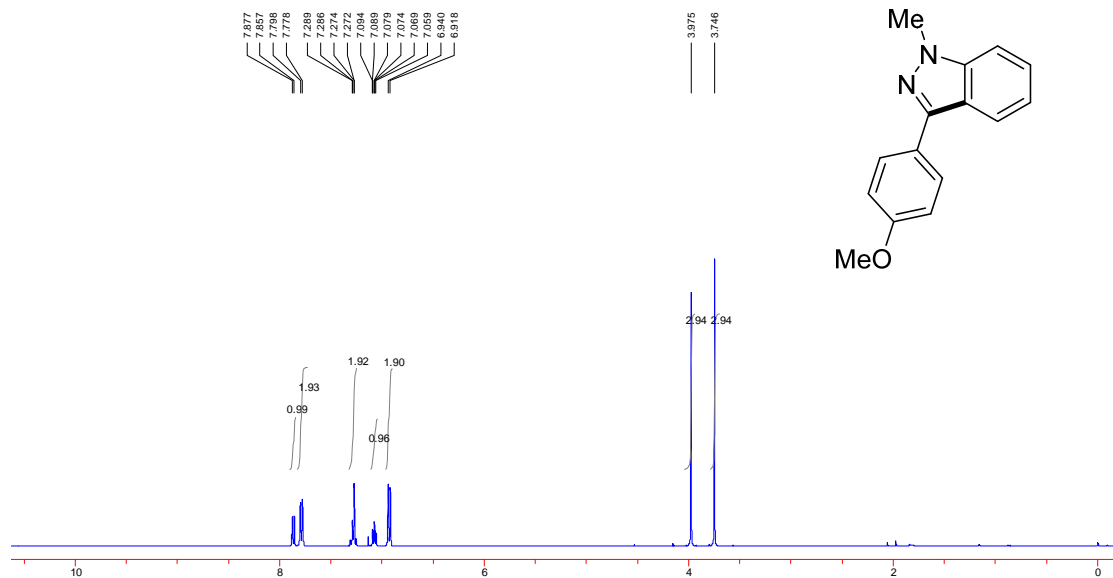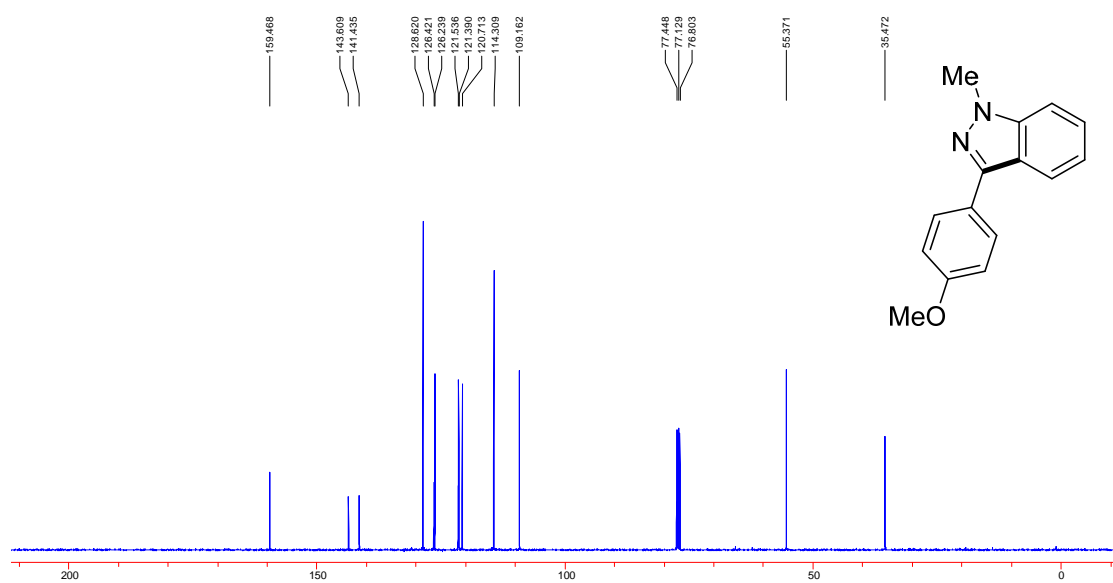

# NMR spectra of **2i**

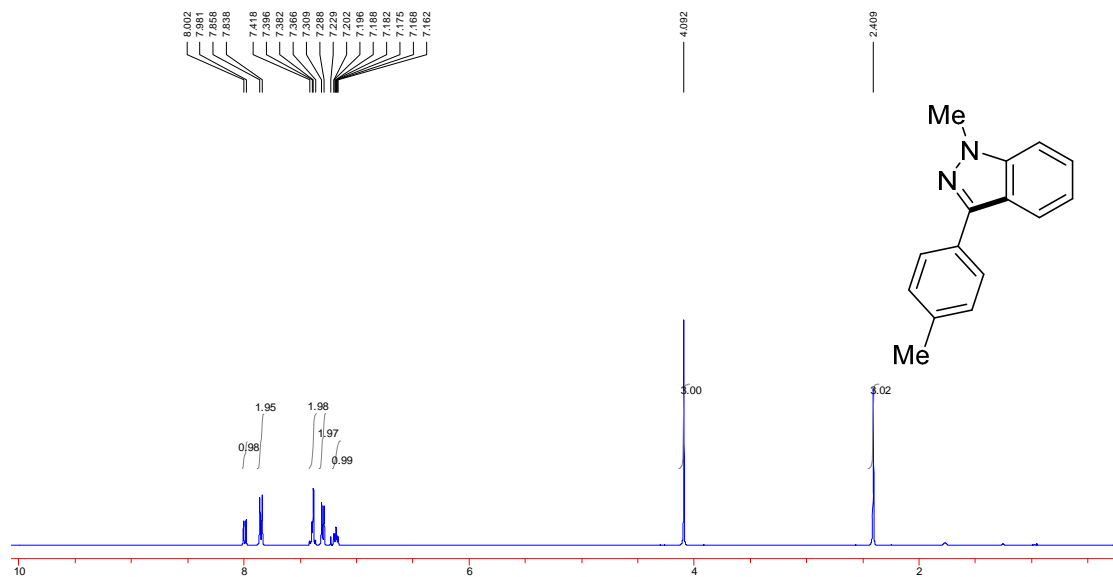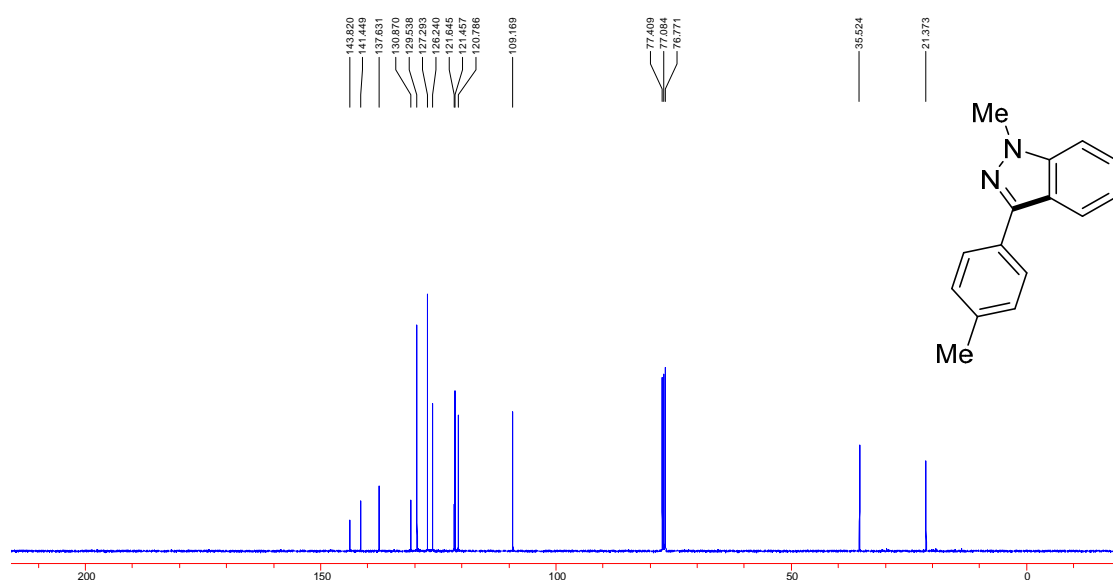

# NMR spectra of **2j**

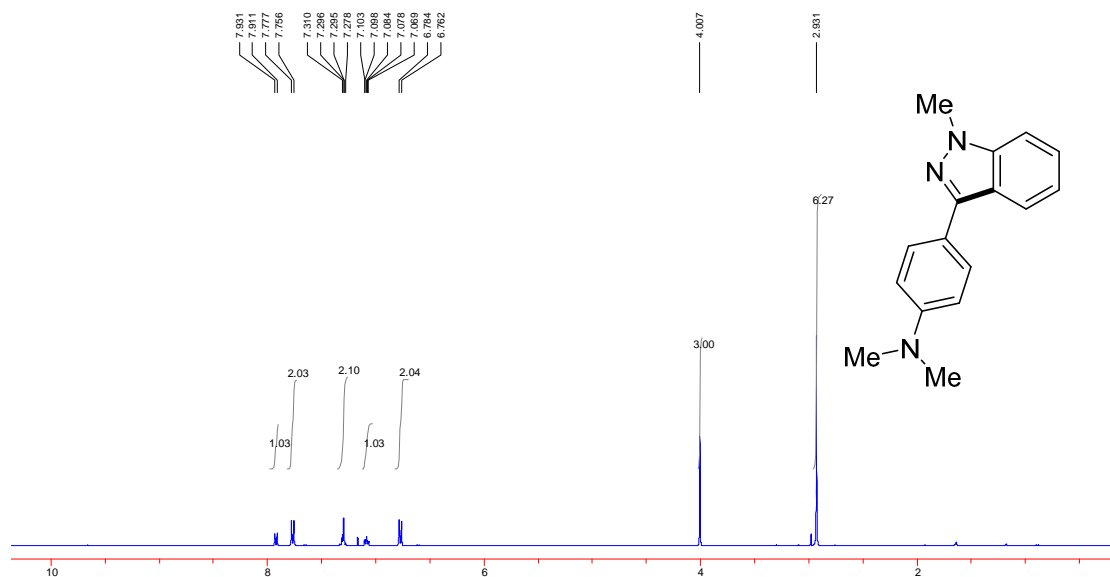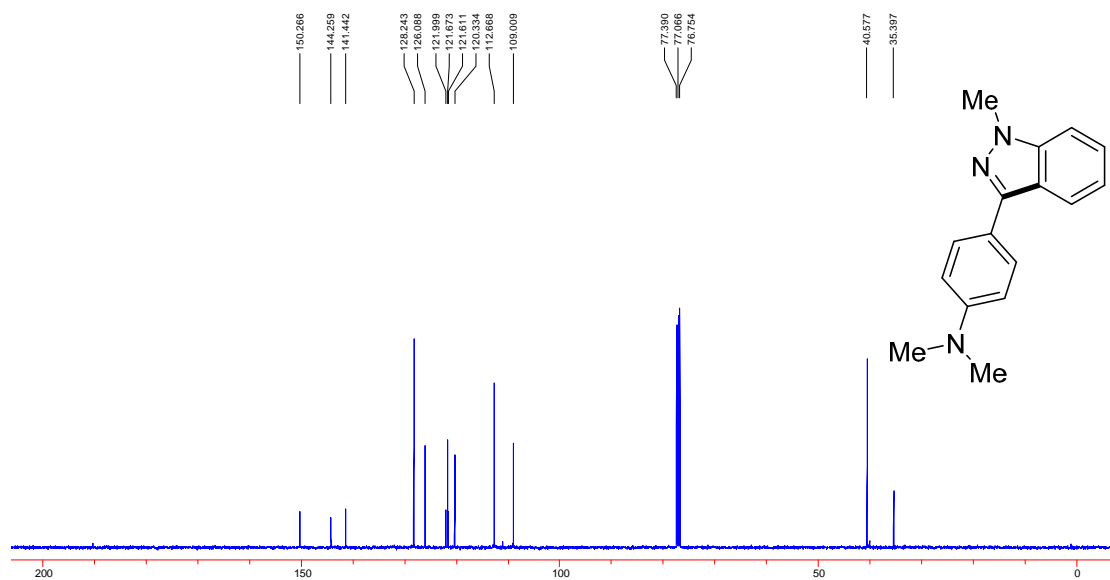

# NMR spectra of **2k**

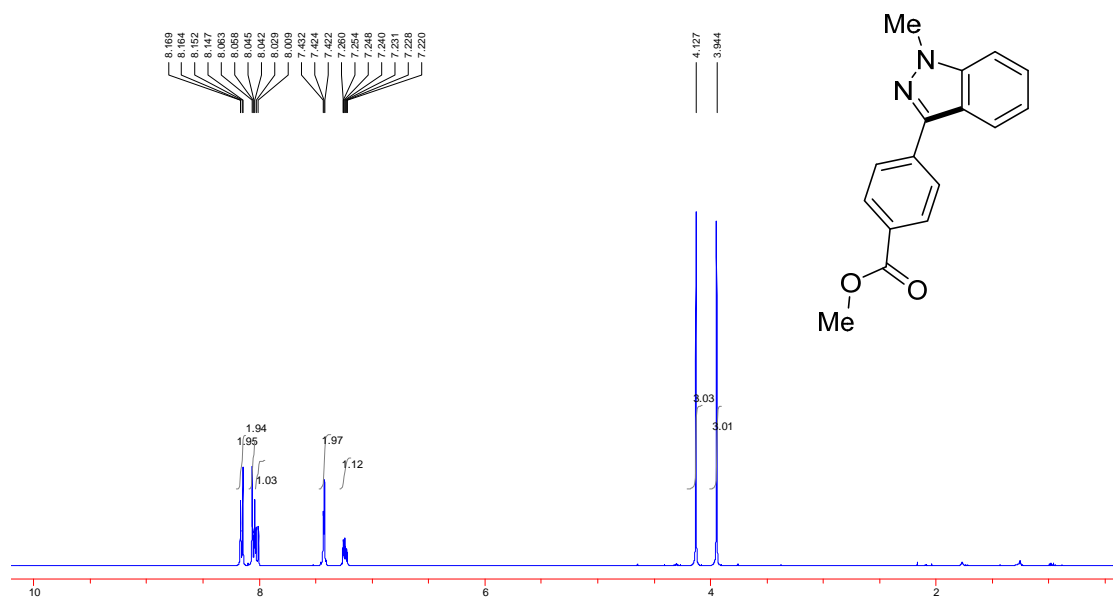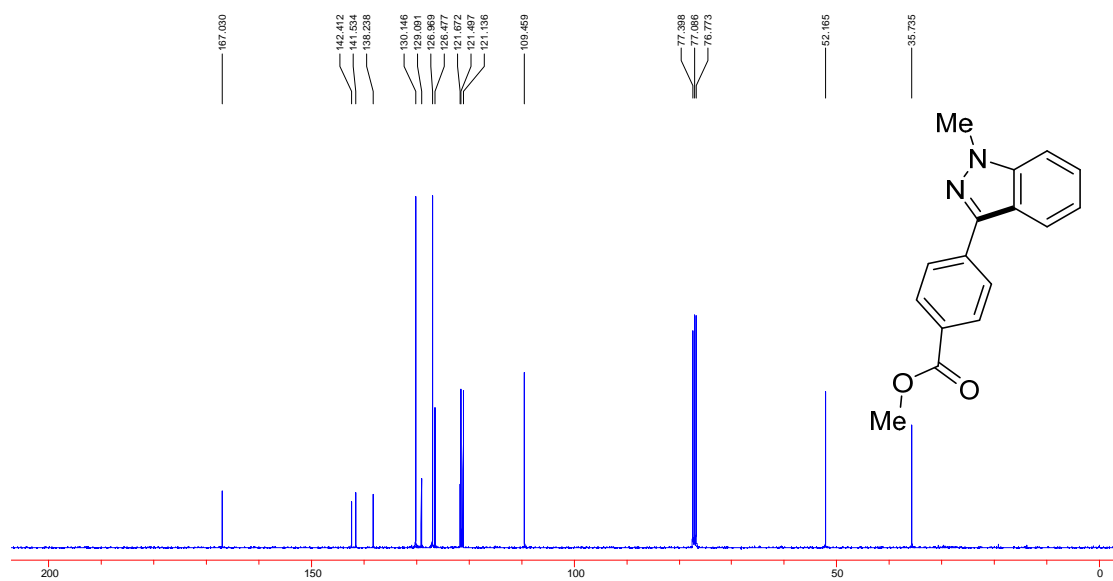

# NMR spectra of **2l**

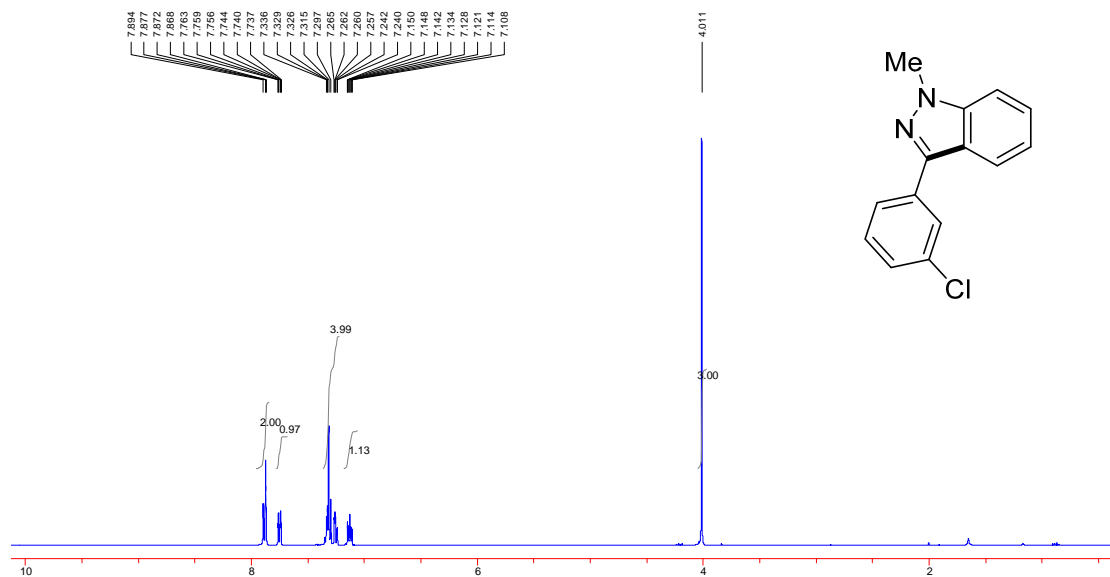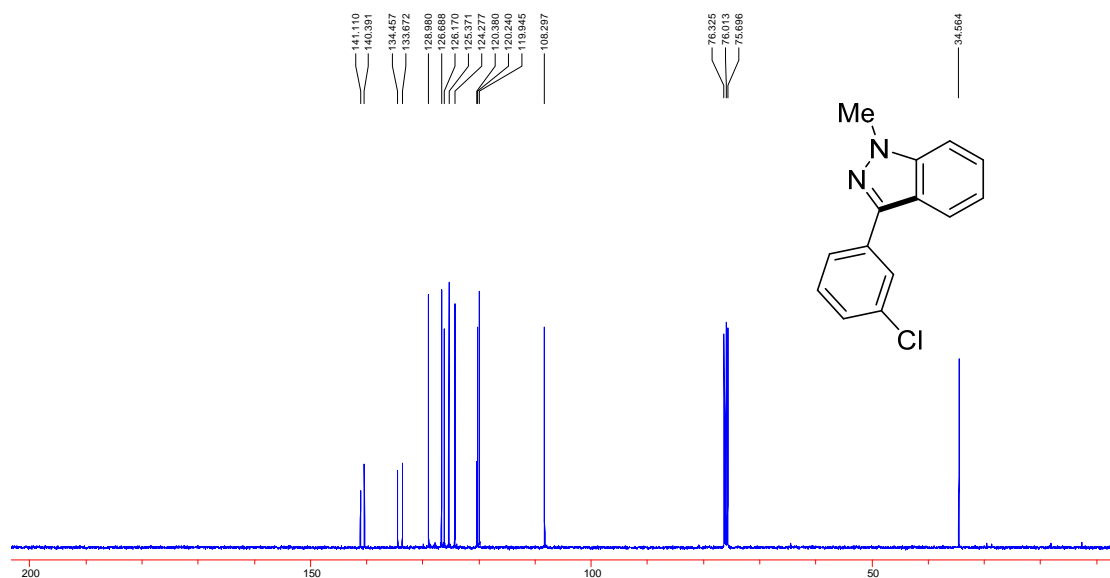

# NMR spectra of **2m**

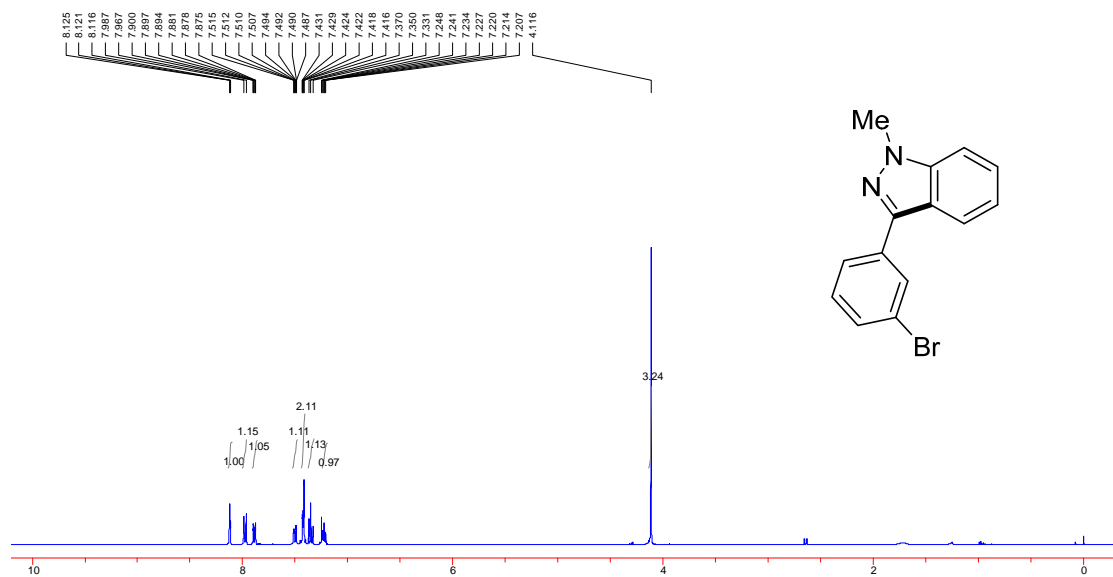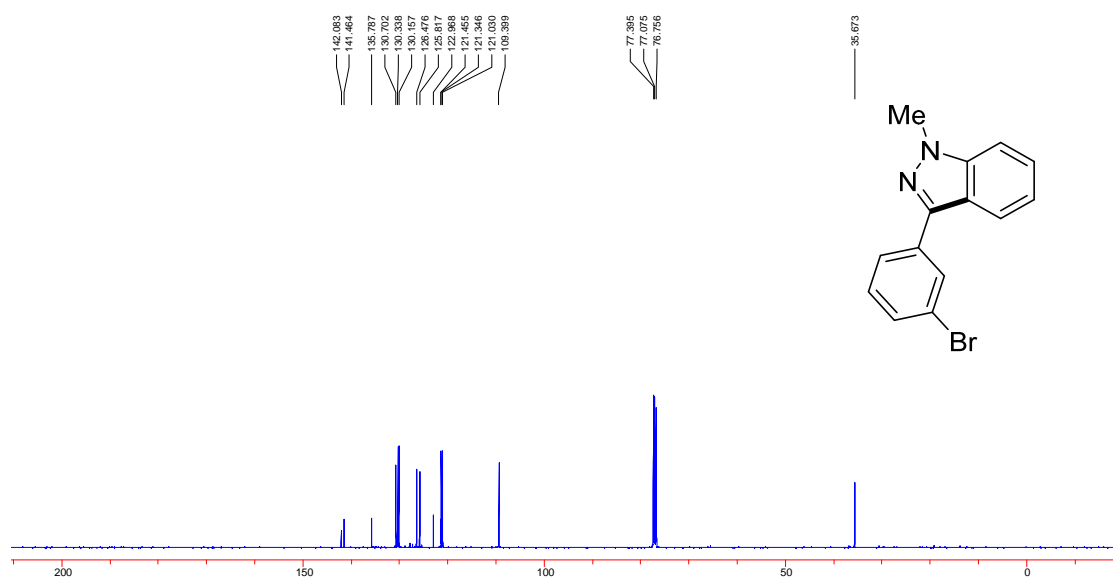



# NMR spectra of **2n**

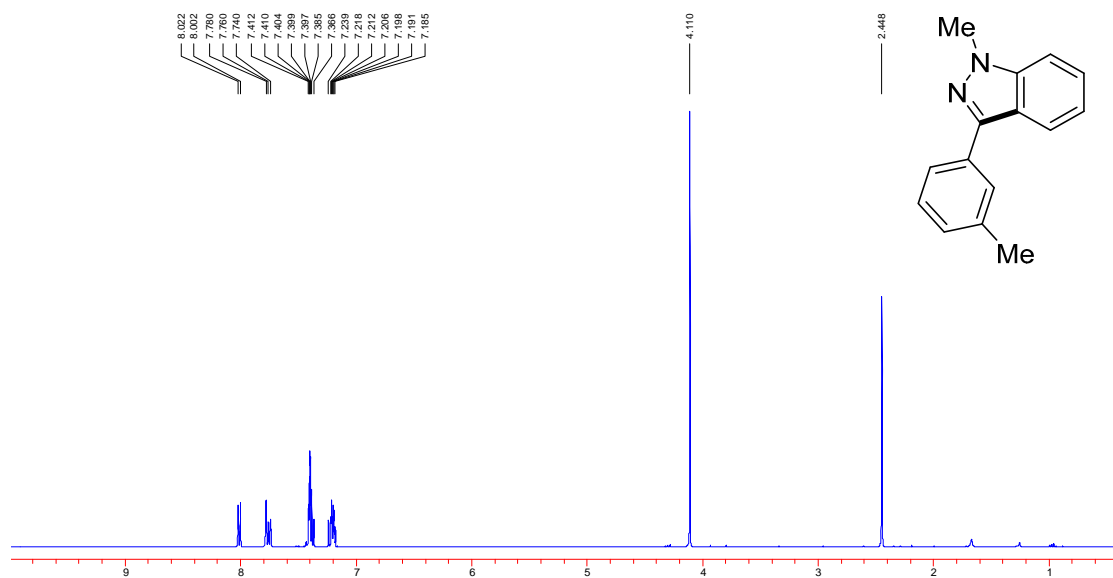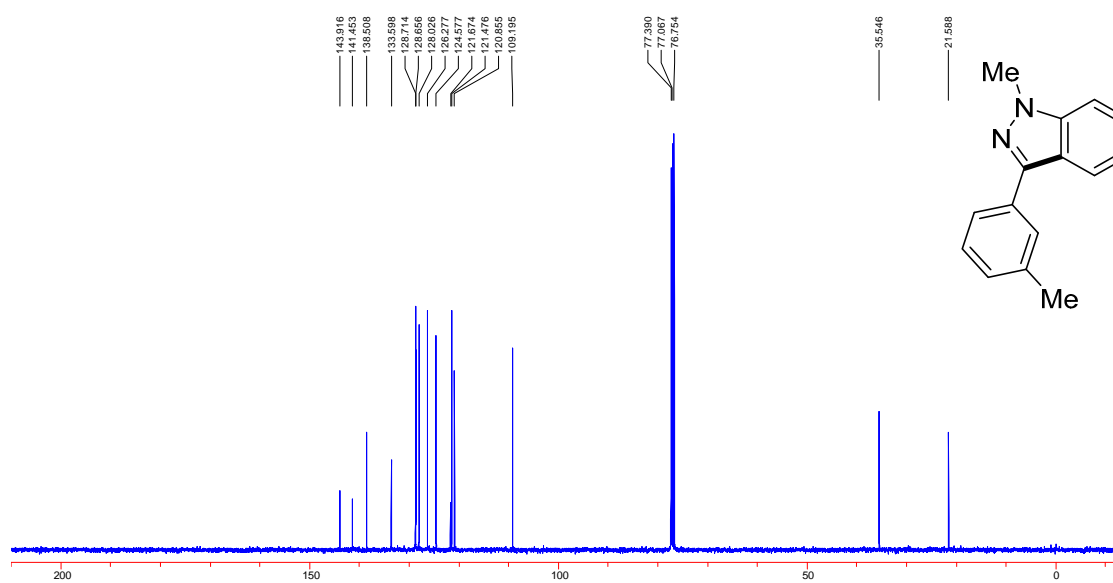

# NMR spectra of **2o**

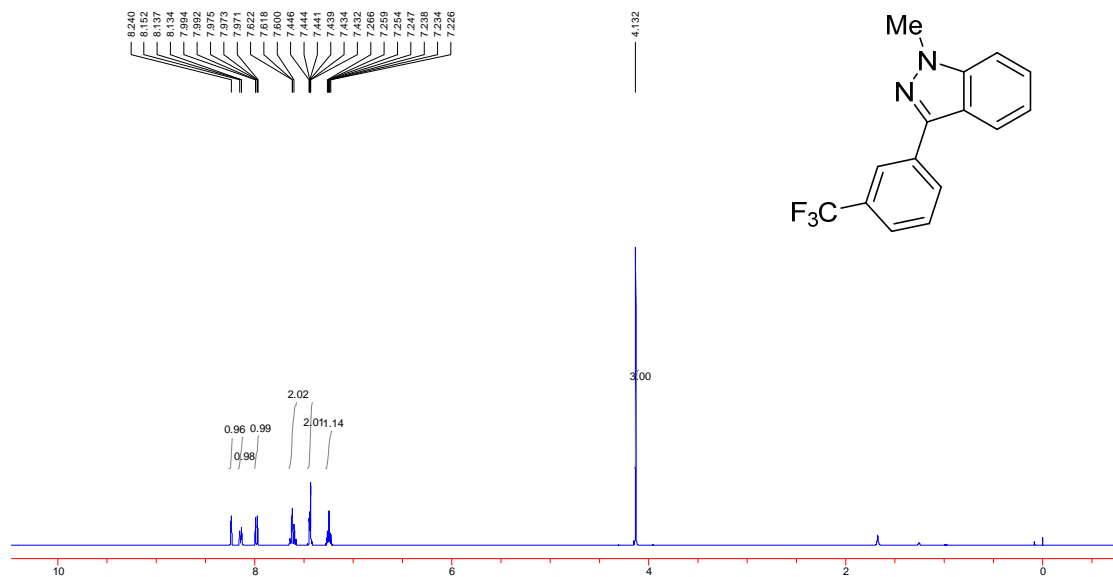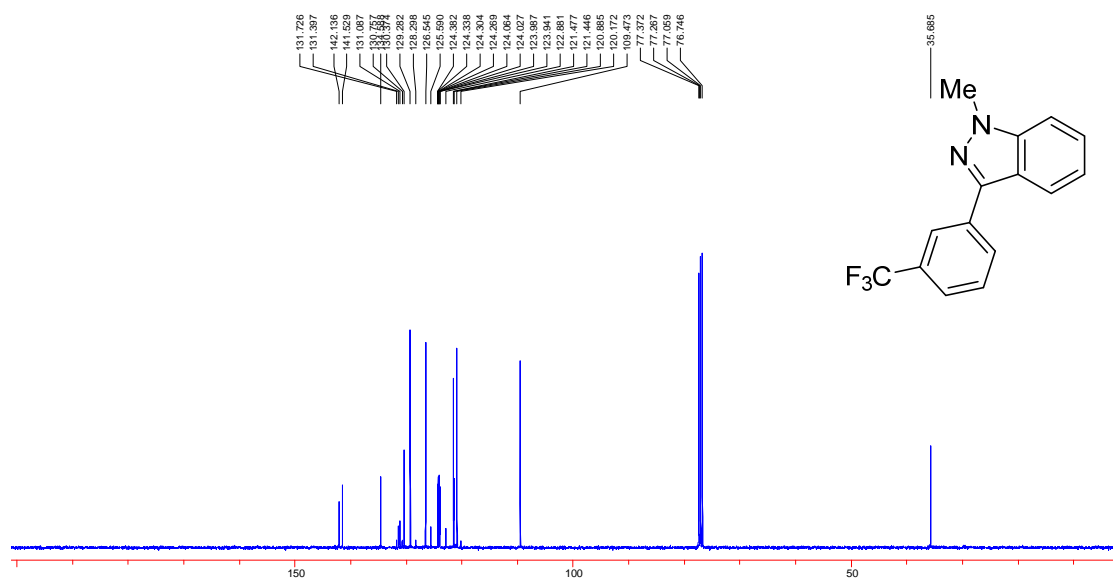

# NMR spectra of **2p**

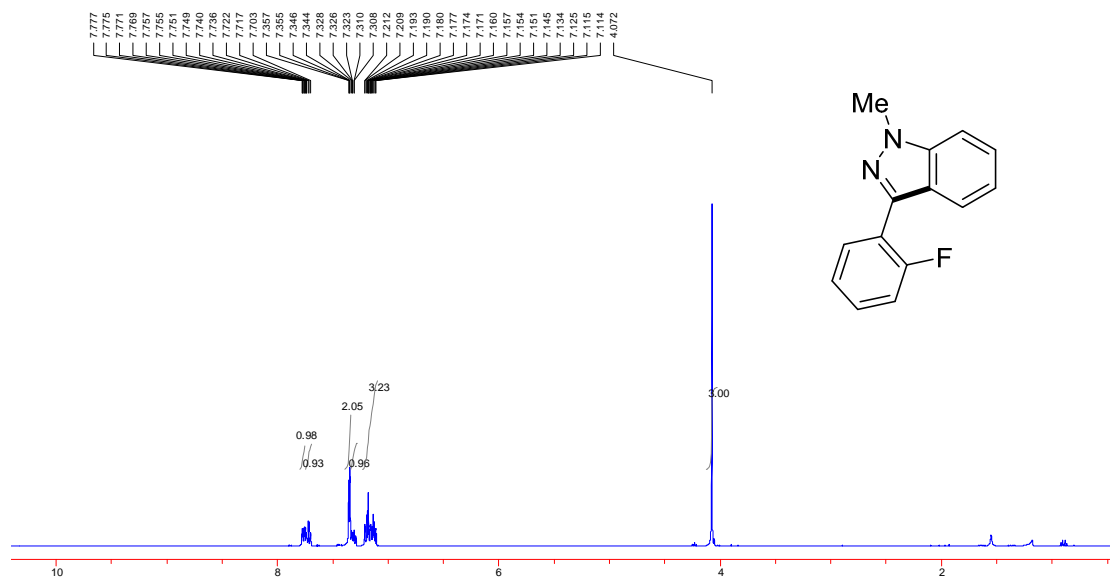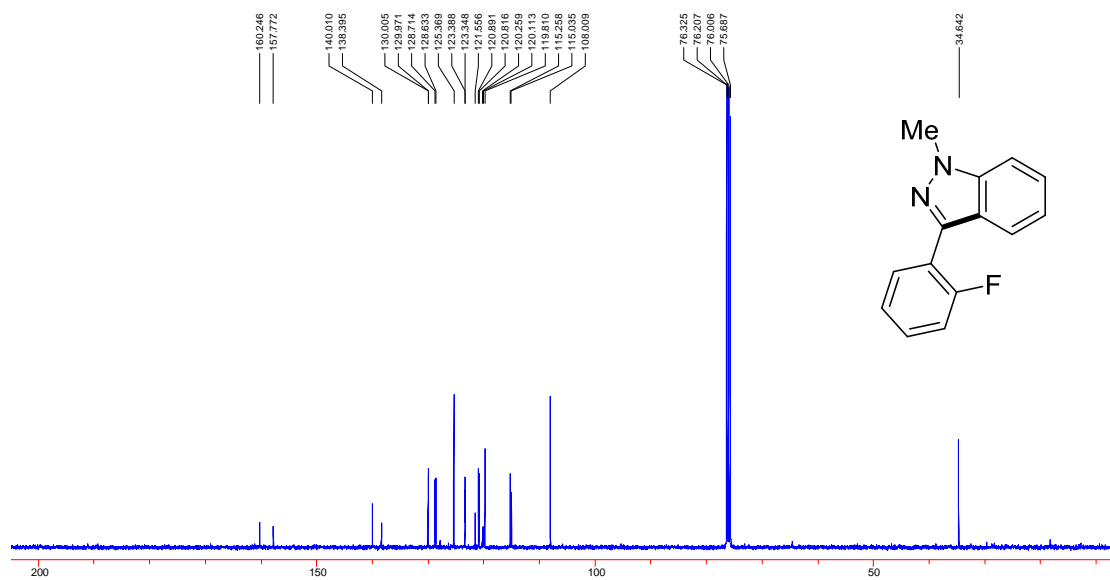

# NMR spectra of **2q**

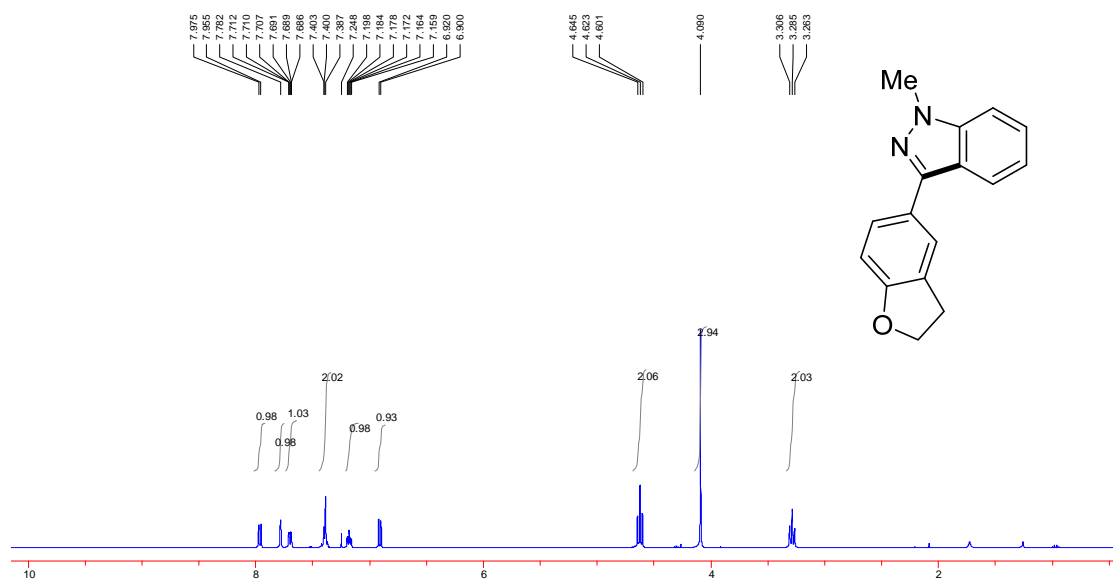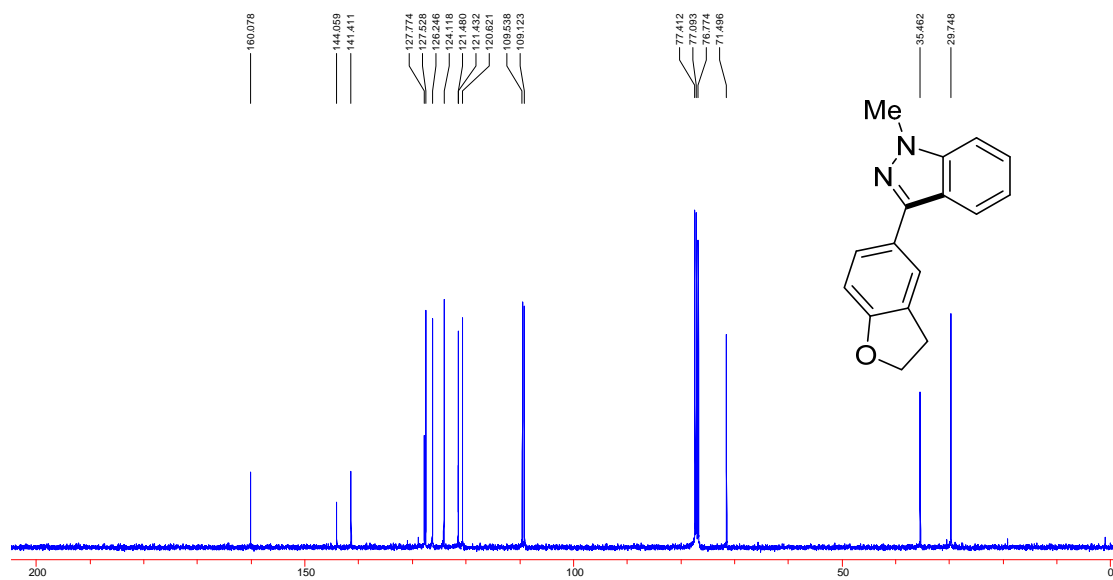

# NMR spectra of **2r**

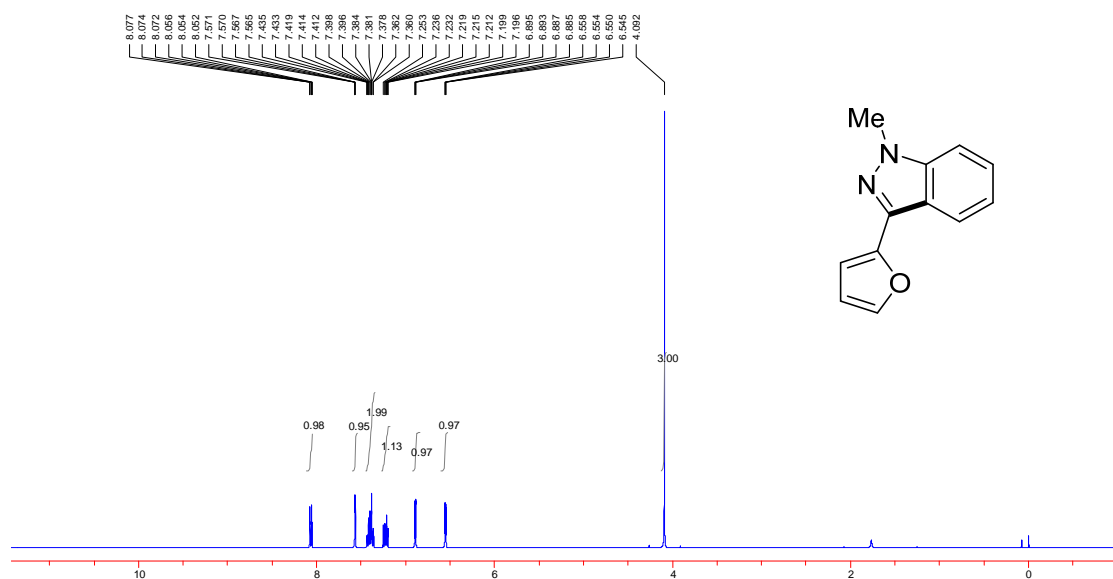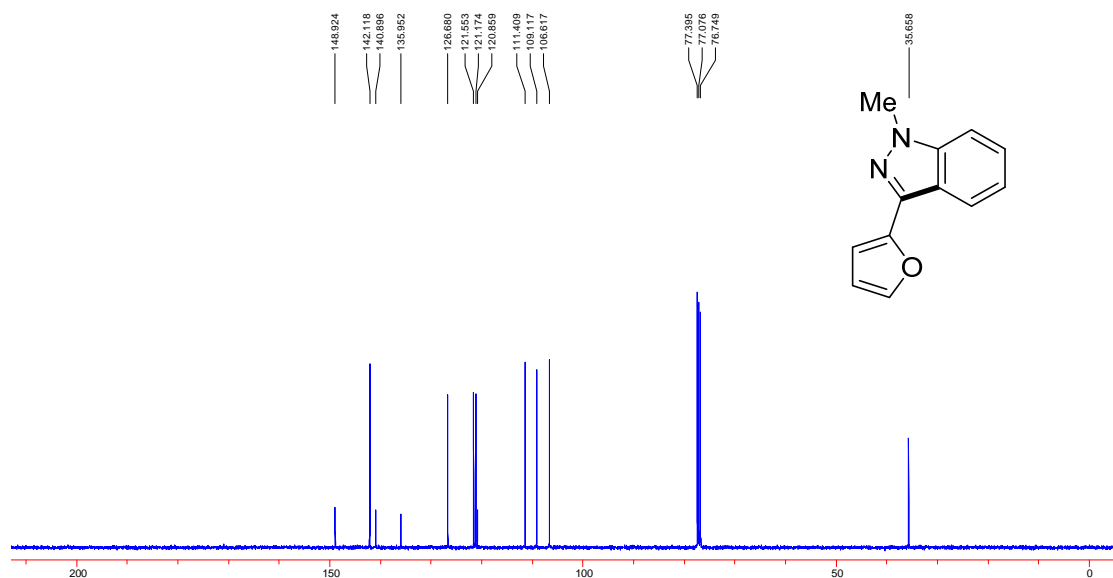

# NMR spectra of **2s**

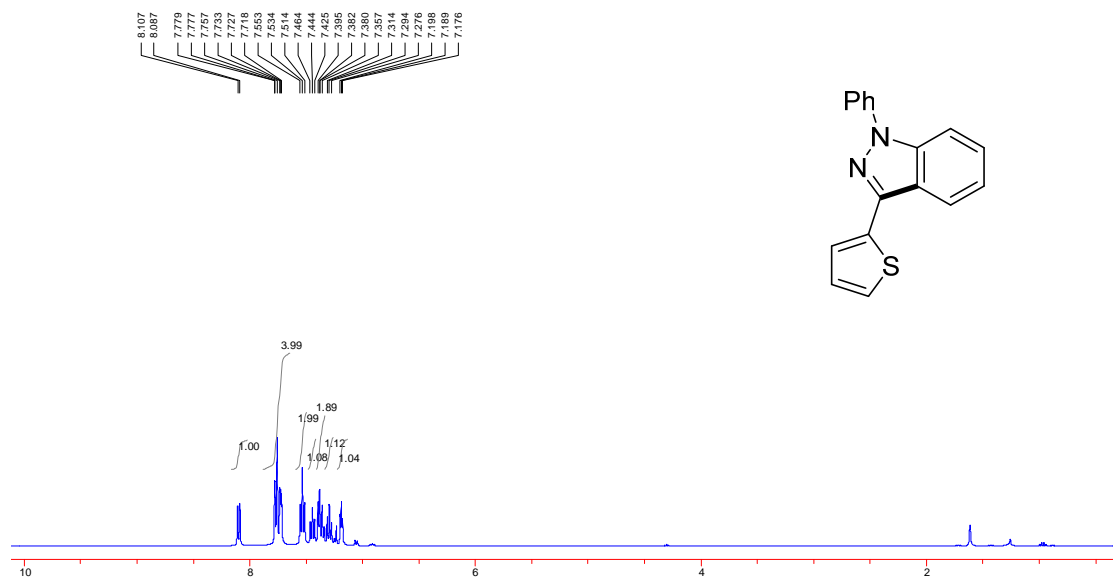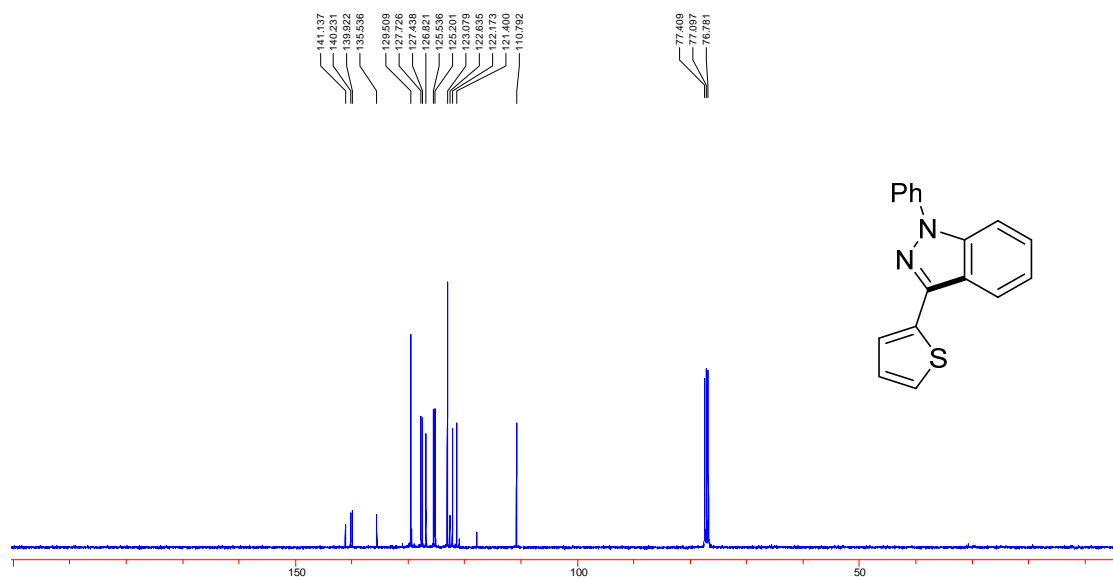

# NMR spectra of **2t**

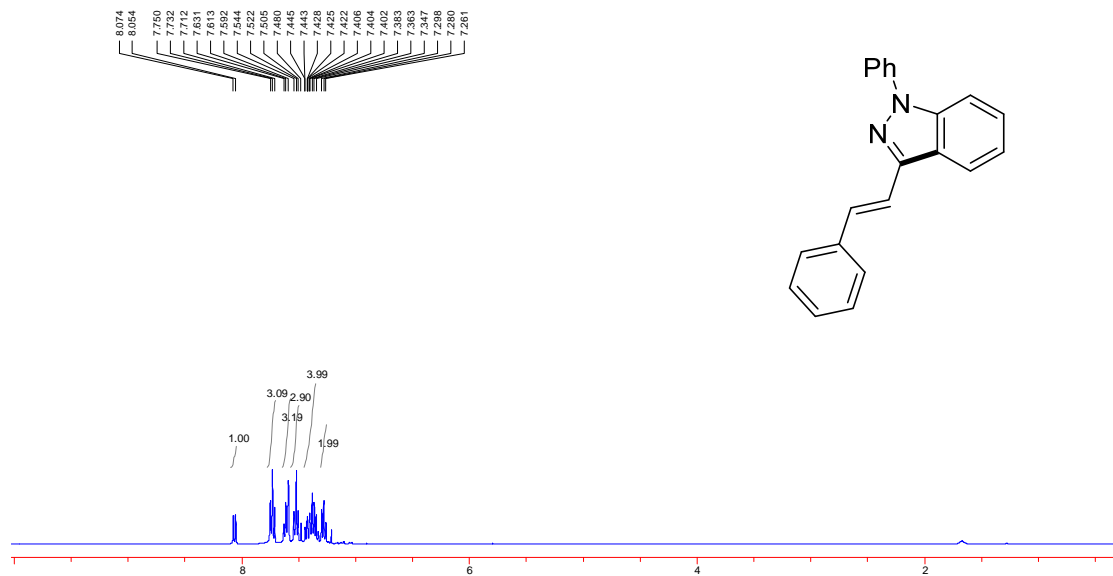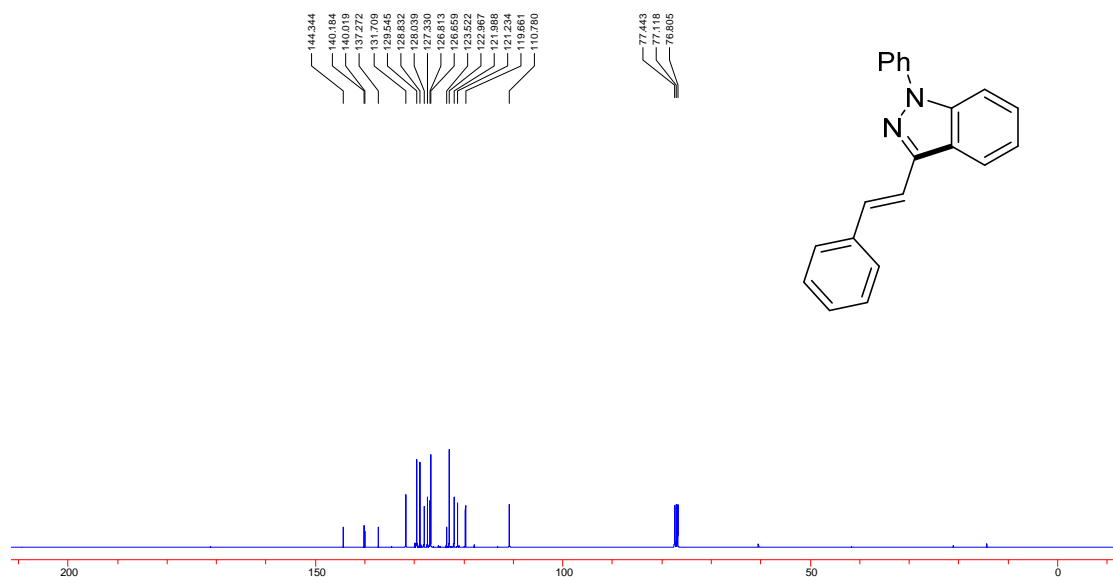

# NMR spectra of **2u** and **2u'**

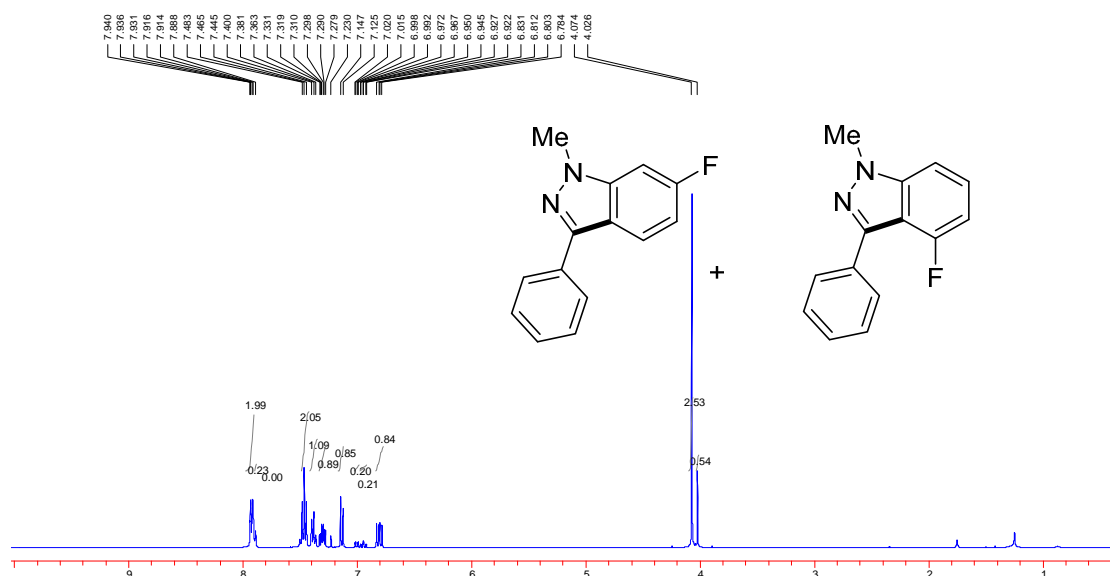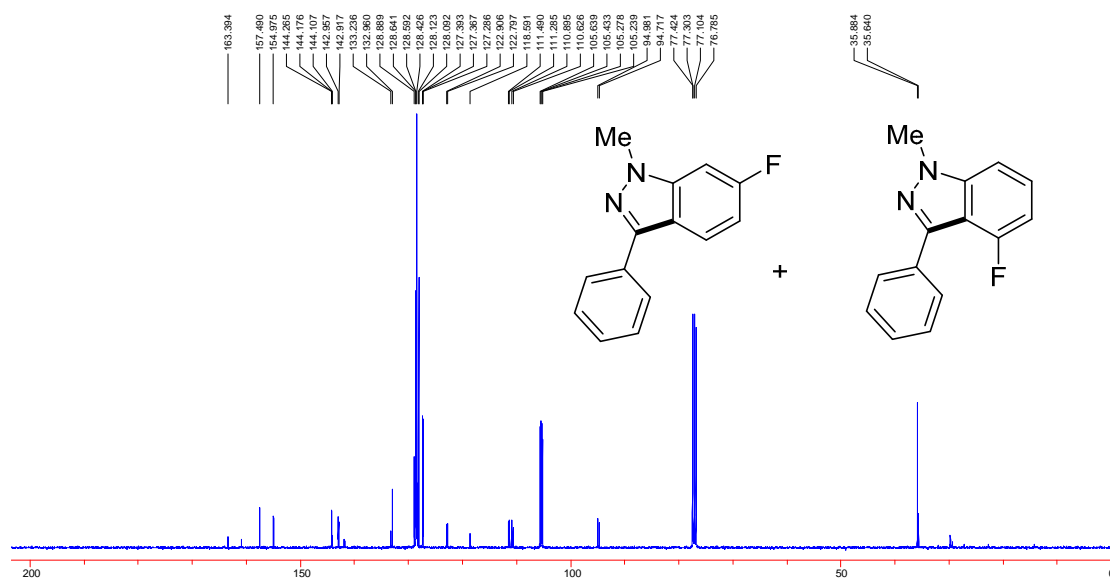



# NMR spectra of **2v** and **2v'**

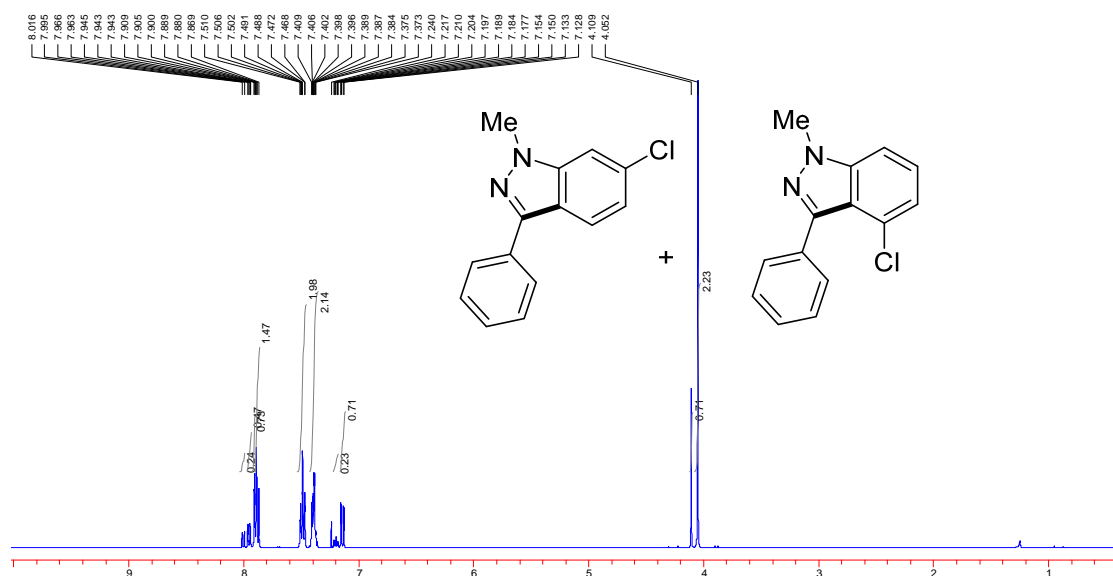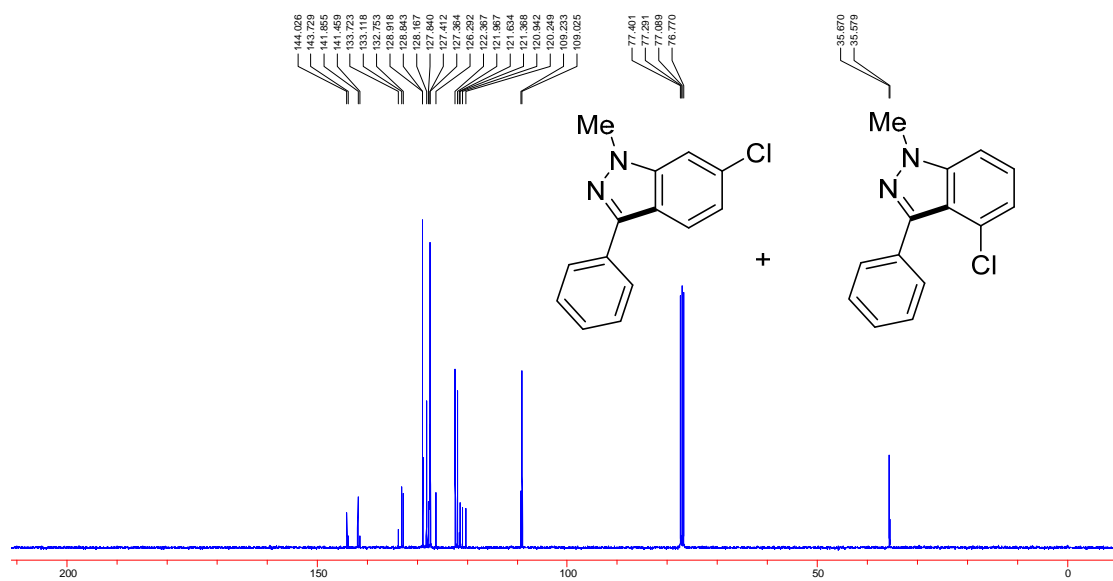

# NMR spectra of **2w**

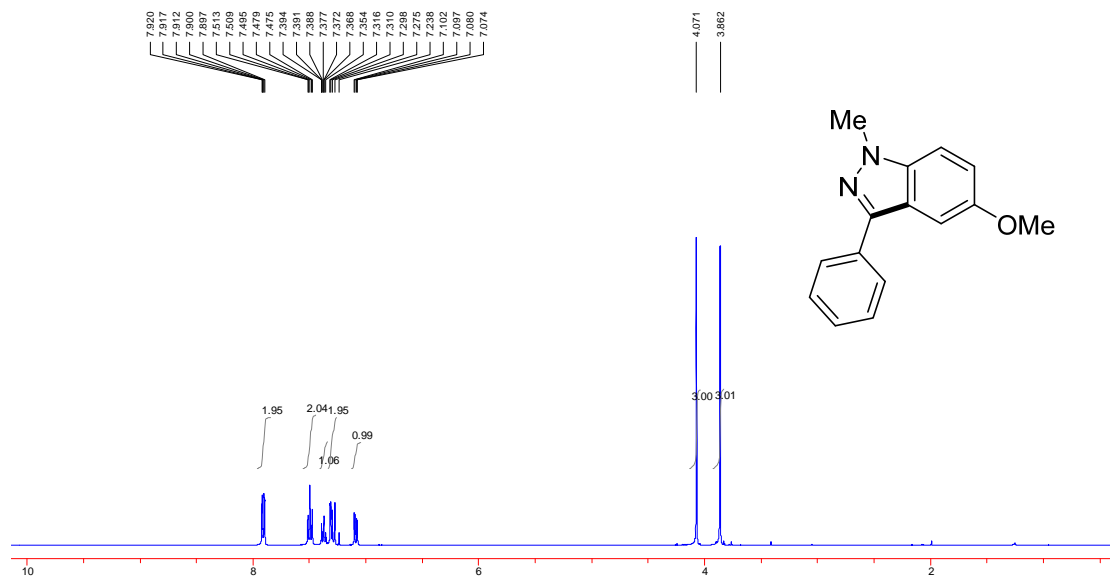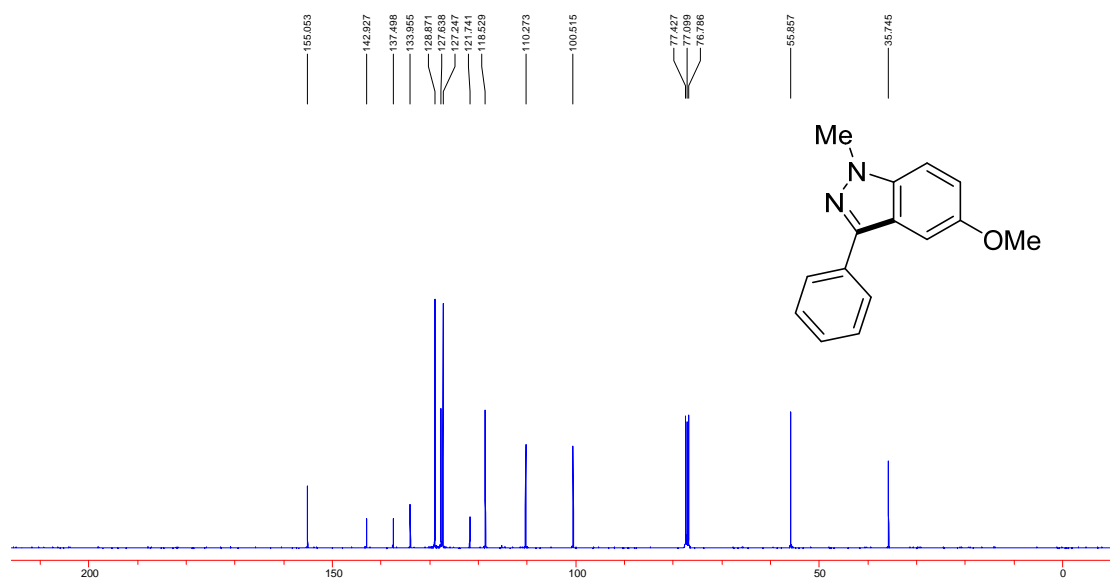

# NMR spectra of **2x**

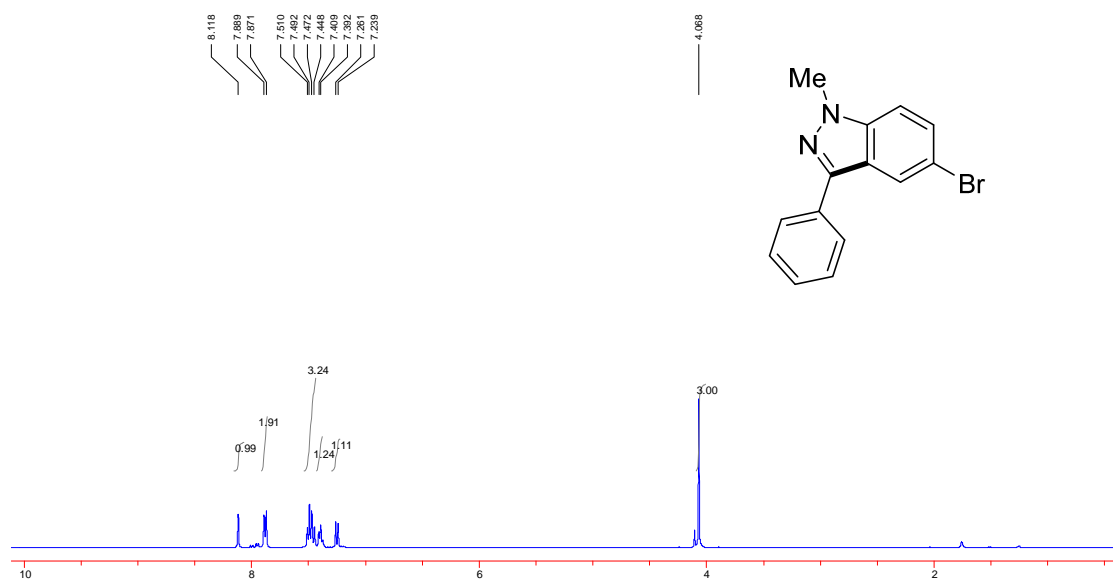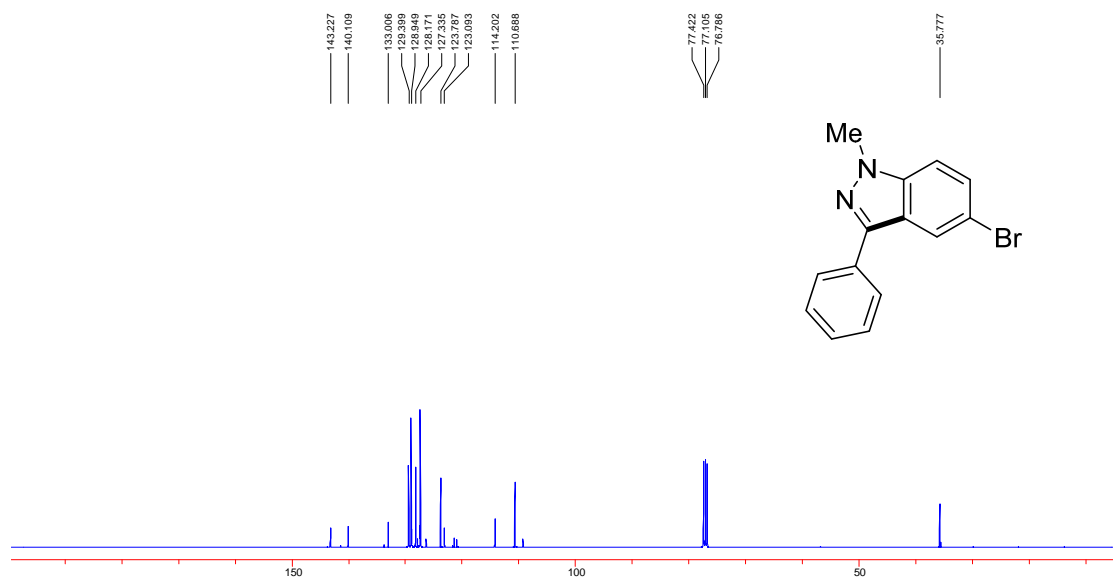

# NMR spectra of 4a

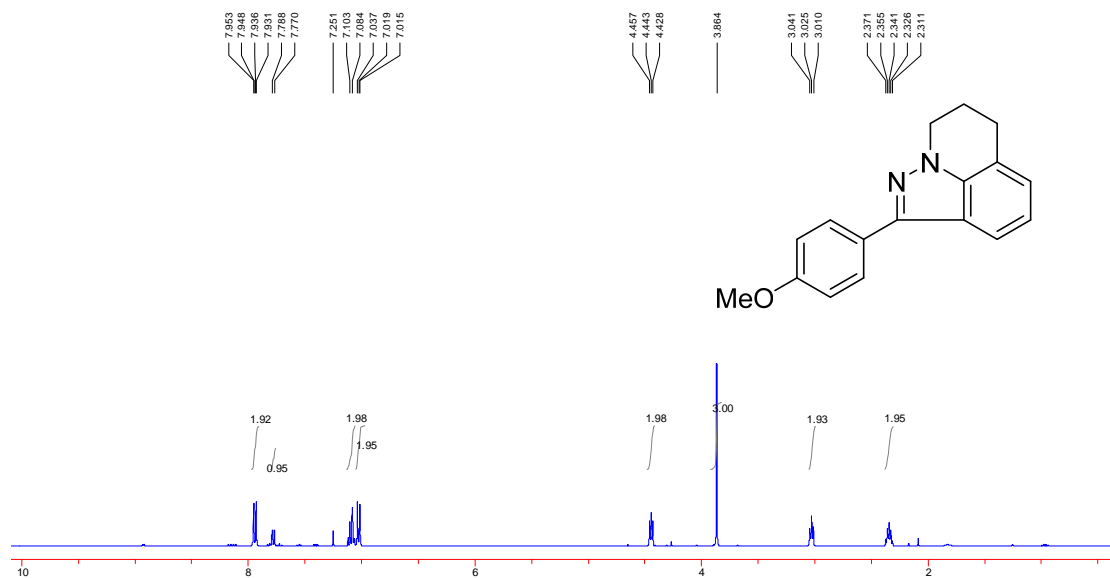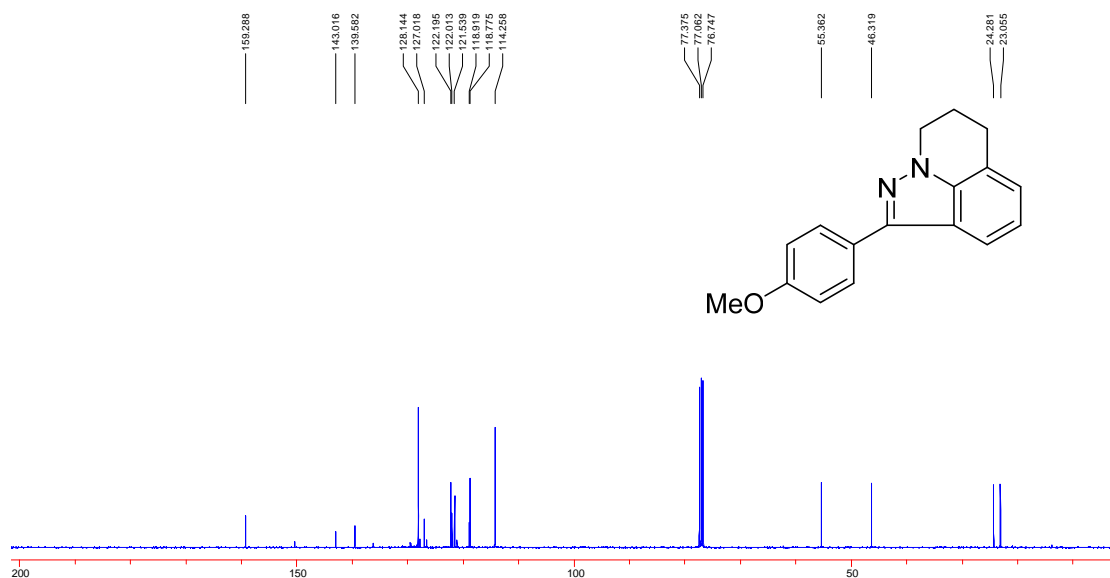

# NMR spectra of **4b**

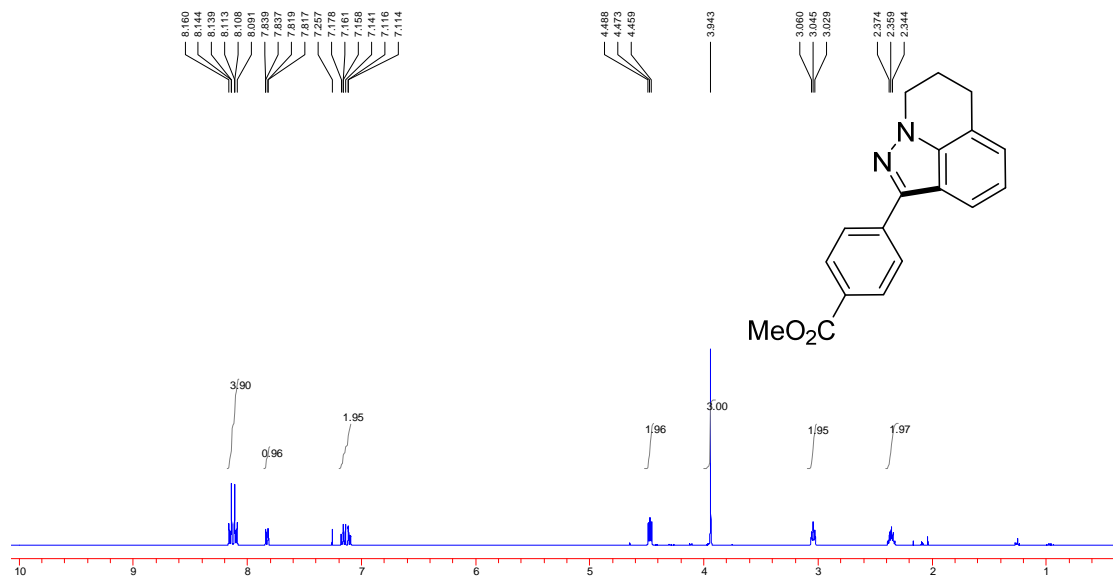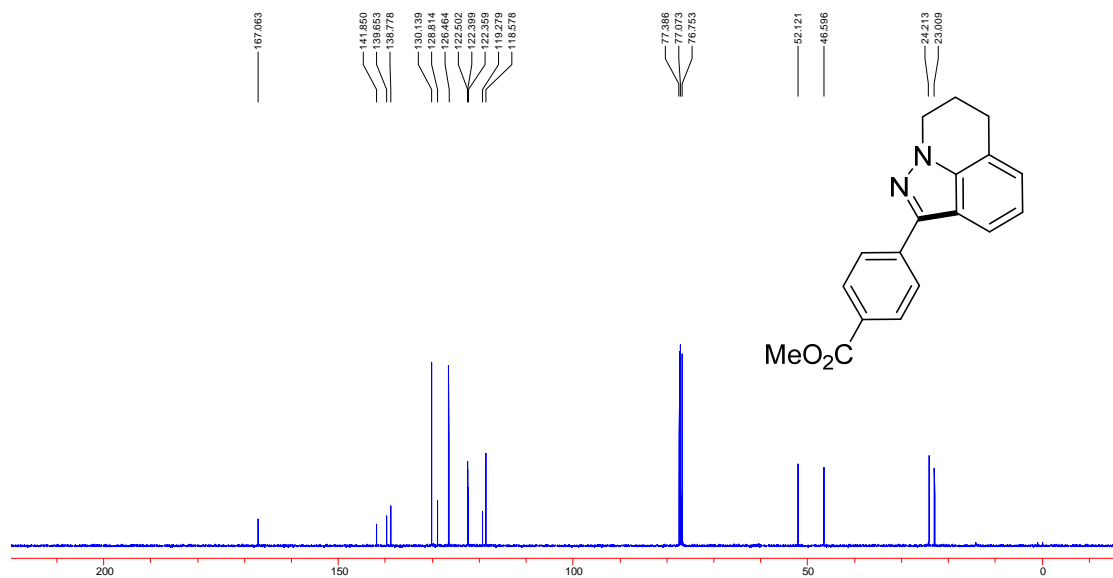

# NMR spectra of **4c**

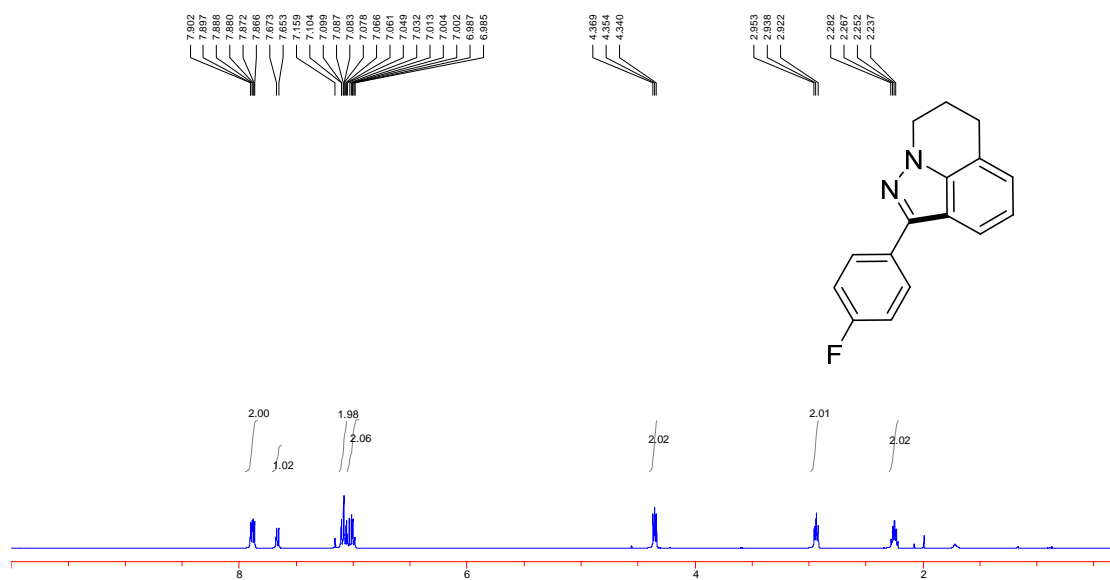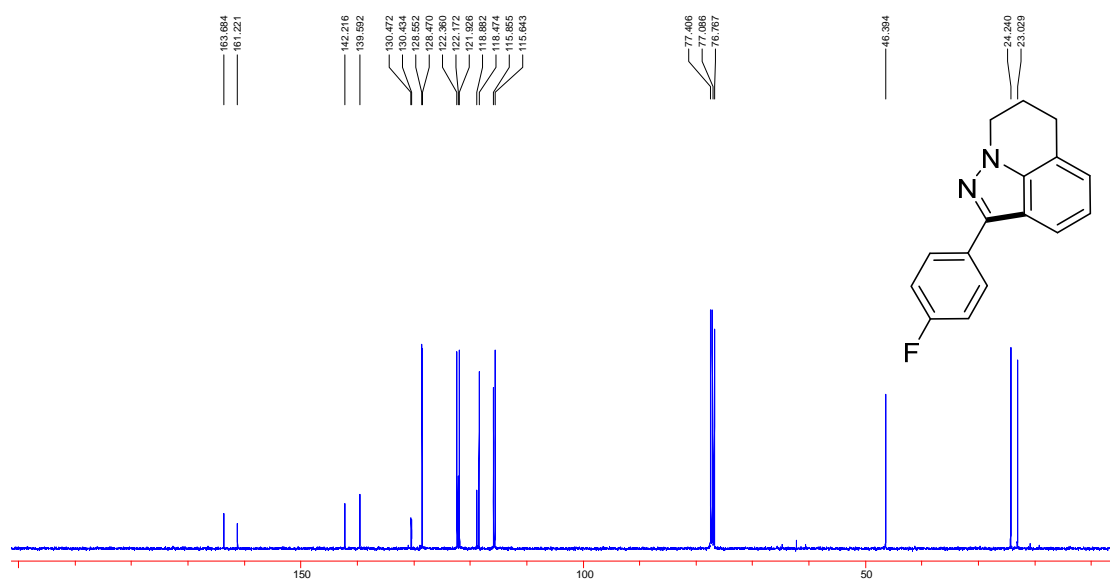

# NMR spectra of **4d**

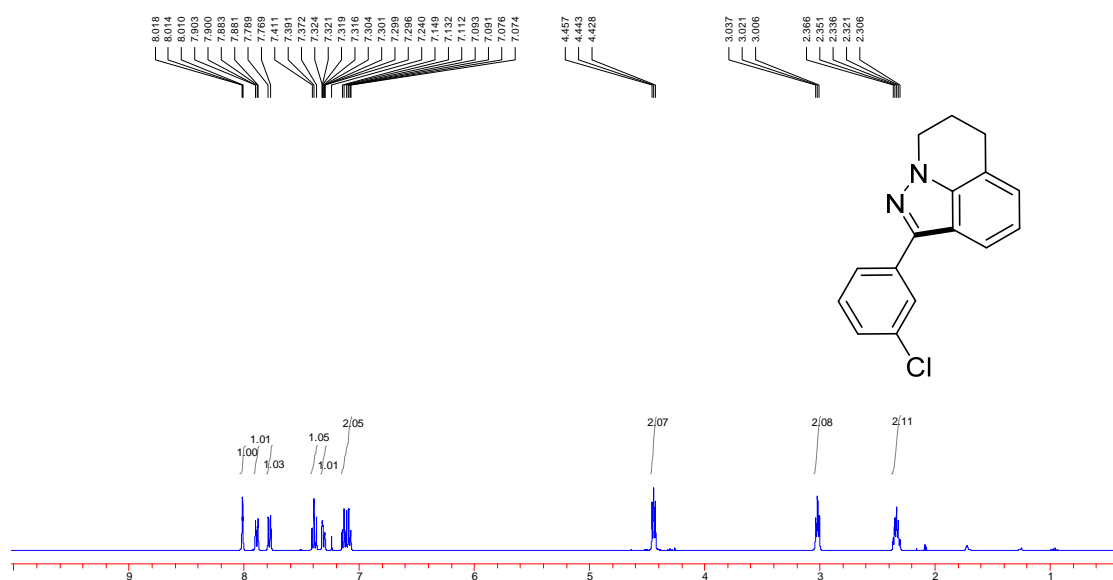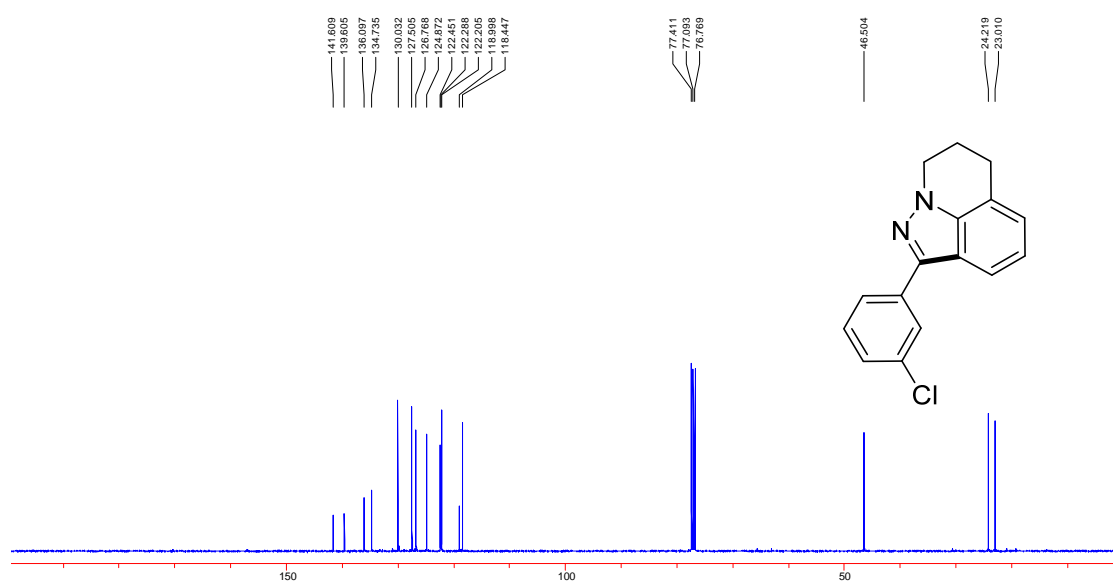

# NMR spectra of **4e**

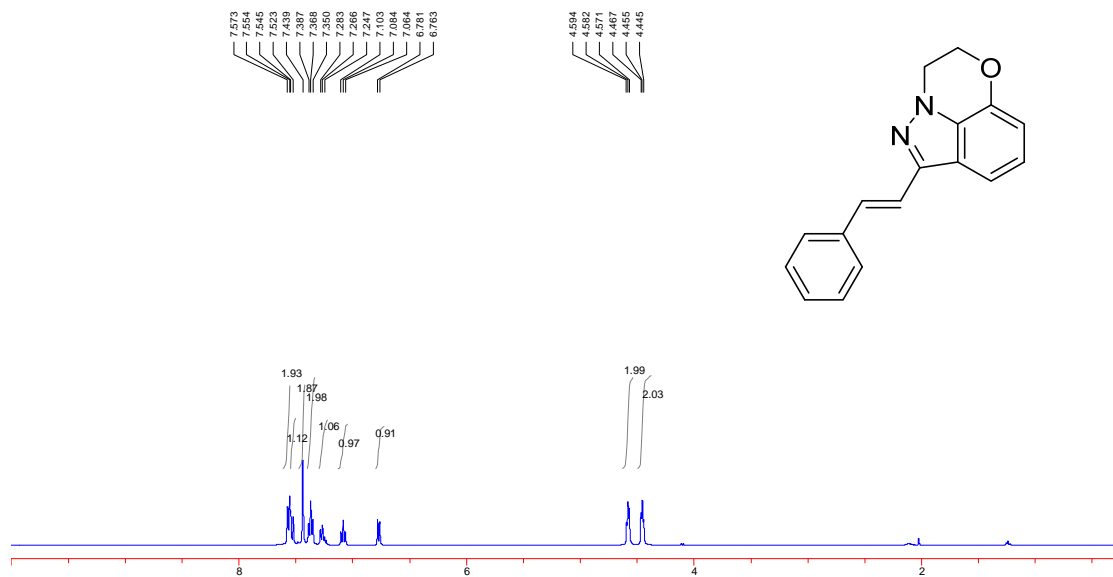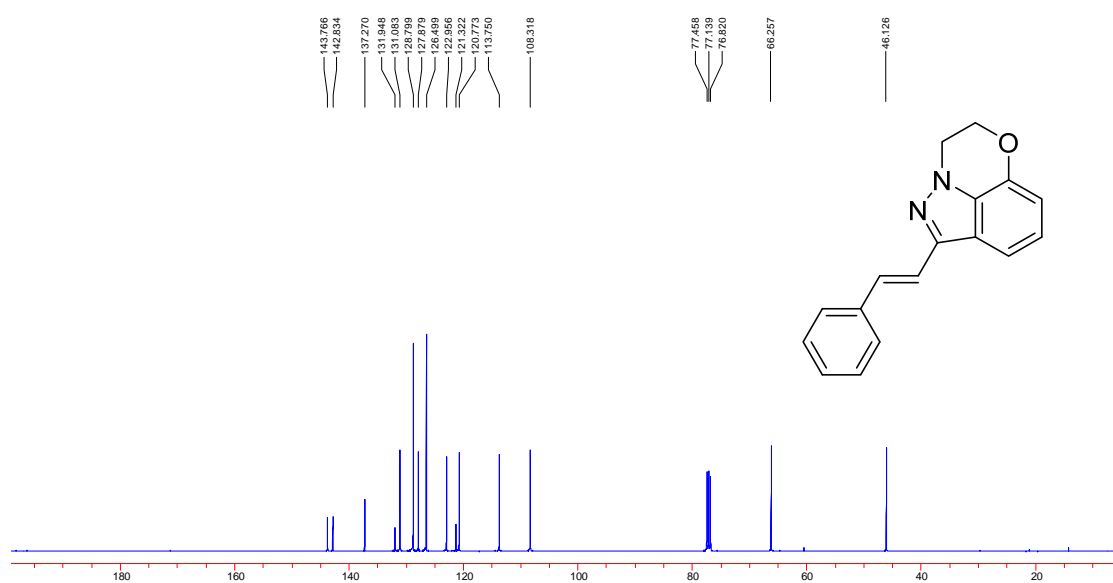



# NMR spectra of **4f**

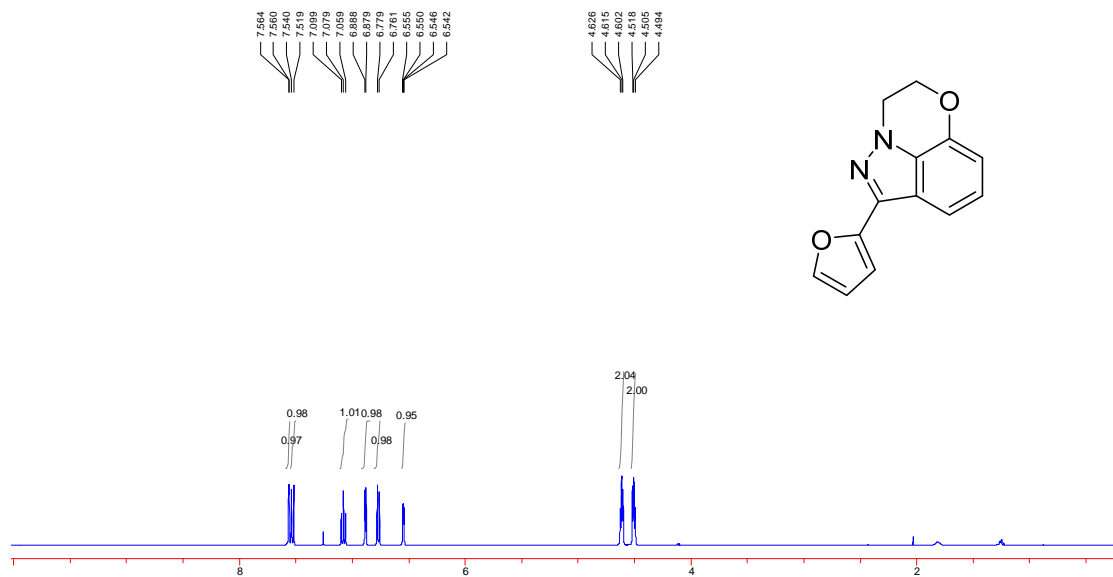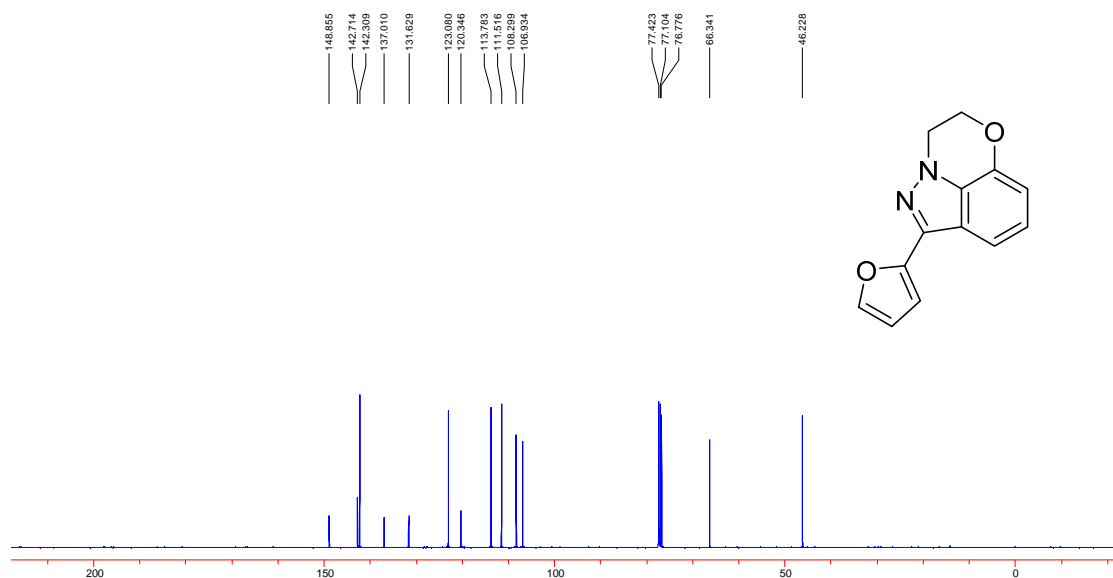

Supplement: SC-008-C6SC03888C-s001.pdf [file SC-008-C6SC03888C-s001.pdf]
